# Supplementary material for: Enhanced Solid-State Fluorescence of Flavin Derivatives by In-Corporation in the Metal-Organic Frameworks MIL-53(Al) and MOF-5
Source: Preprints.org preprint supplement (doi:10.20944/preprints202302.0498.v1), 2023-02-28
Supplement: Supplementary file 1 [file supplementary]

Supplementary Material

Enhanced solid-state fluorescence of flavin derivatives by incorporation in metal-organic frameworks MIL-53(Al) and MOF-5

Dietrich Püschel 1,Simon Hédé 2,Ivan Maisuls 3,Simon-Patrick Höfert 1, Dennis Woschko 1, Ralf Kühnemuth 4,Suren Felekyan 4, Claus A. M. Seidel 4,*, Constantin Czekelius 5, Oliver Weingart 2,*, Cristian A. Strassert 3,*and Christoph Janiak 1,*

1 Institut für Anorganische Chemie und Strukturchemie, Heinrich-Heine-Universität Düsseldorf, Universitätsstraße 1, D-40225 Düsseldorf, Germany. [Dietrich.Pueschel@hhu.de](mailto:Dietrich.Pueschel@hhu.de) (D.P.); [Simon.patrick.hoefert@googlemail.com](mailto:Simon.patrick.hoefert@googlemail.com) (S.-P.H.); [Dennis.Woschko@hhu.de](mailto:Dennis.Woschko@hhu.de) (D.W.); [janiak@uni-duesseldorf.de](mailto:janiak@uni-duesseldorf.de) (C.J.)

2 Institut für Theoretische Chemie und Computerchemie, Heinrich-Heine-Universität Düsseldorf, Universitätsstraße 1, D-40225 Düsseldorf, Germany. [Simon.Hede@hhu.de](mailto:Simon.Hede@hhu.de) (S.H.); [Oliver.Weingart@hhu.de](mailto:Oliver.Weingart@hhu.de) (O.W.)

3 Institut für Anorganische und Analytische Chemie, CeNTech, CiMIC, SoN, Westfälische Wilhelms-Universität Münster, Heisenbergstraße 11, D-48149 Münster, Germany. [Maisuls@uni-muenster.de](mailto:Maisuls@uni-muenster.de) (I.M.); [ca.s@wwu.de](mailto:ca.s@wwu.de) (C.S.)

4 Institut für Physikalische Chemie, Heinrich-Heine-Universität Düsseldorf, Universitätsstraße 1, D-40225 Düsseldorf, Germany. [Ralf.Kuehnemuth@hhu.de](mailto:Ralf.Kuehnemuth@hhu.de) (R.K.); [Suren.Felekyan@uni-duesseldorf.de](mailto:Suren.Felekyan@uni-duesseldorf.de) (S.K.); [Cseidel@hhu.de](mailto:Cseidel@hhu.de) (C.A.M.S.)

5 Institut für Organische Chemie und Makromolekulare Chemie, Heinrich-Heine-Universität Düsseldorf, Universitätsstraße 1, D-40225 Düsseldorf, Germany. [Constantin.Czekelius@hhu.de](mailto:Constantin.Czekelius@hhu.de) (C.C.)

Corresponding author:

E-mail: [janiak@uni-duesseldorf.de](mailto:janiak@uni-duesseldorf.de); Fax: + 49-211-81-12287; Tel: +49-211-81-12286

Additional E-mail addresses:

[Dietrich.Pueschel@hhu.de](mailto:Dietrich.Pueschel@hhu.de); [Simon.Hede@hhu.de](mailto:Simon.Hede@hhu.de); [Maisuls@uni-muenster.de](mailto:Maisuls@uni-muenster.de); Simon.patrick.hoefert@googlemail.com; [Dennis.Woschko@hhu.de](mailto:Dennis.Woschko@hhu.de); [Ralf.Kuehnemuth@hhu.de](mailto:Ralf.Kuehnemuth@hhu.de); [Suren.Felekyan@uni-duesseldorf.de](mailto:Suren.Felekyan@uni-duesseldorf.de), [Cseidel@hhu.de](mailto:Cseidel@hhu.de) ; [Oliver.Weingart@hhu.de](mailto:Oliver.Weingart@hhu.de); [Constantin.Czekelius@hhu.de](mailto:Constantin.Czekelius@hhu.de); [ca.s@wwu.de](mailto:ca.s@wwu.de)

Table of Contents

[Section S1: Materials and methods 3](#_Toc128392665)

[Section S1.1: Synthesis of flavins 3](#_Toc128392666)

[Section S1.2: MOF syntheses and flavin incorporation 3](#_Toc128392667)

[Section S2: MIA and 6F-MIA absorption spectra and calibration curves (Figure S3 - Figure S10) 9](#_Toc128392668)

[Section S3: Structure descriptions (Figure S11 - Figure S14) 14](#_Toc128392669)

[Section S3.1: Structure of 10‐methyl‐isoalloxazine (MIA) (Figure S11) 14](#_Toc128392670)

[Section S3.2: Additional structure description of MIL-53(Al) (Figure S12 and Figure S13) 14](#_Toc128392671)

[Section S3.3: Additional structure description of MOF-5 (Figure S14) 16](#_Toc128392672)

[Section S4: Nitrogen adsorption isotherms and powder X-ray diffractograms (Figure S15, Figure S16, Figure S17, Figure S18) 18](#_Toc128392673)

[Section S5: Photophysical characterization of the dyes and dye@MOF (Figure S19 - Figure S34) 23](#_Toc128392674)

[Section S6: Theoretical calculations (Figure S35 - Figure S41) 32](#_Toc128392675)

[Section S6.1: Force Field MIA 32](#_Toc128392676)

[Section S6.2: Force Field MIL-53(Al) 35](#_Toc128392677)

[Section S6.3: Force Field MOF-5 38](#_Toc128392678)

[Section S6.4: QM part, MM part 41](#_Toc128392679)

[Section S6.5: Transition dipole moments of MIA 46](#_Toc128392680)

### Section S1: Materials and methods

Commercially available reagents (Table S1) were used without further purification. All reagents were used in reagent grade without further purification. The solvents were purchased in reagent grade or purified by conventional methods. For reactions requiring an inert atmosphere the glassware was dried in a compartment dryer at 120 °C and standard Schlenk techniques were used to work under a dry nitrogen atmosphere. Degassing of solvents was done by purging with dry nitrogen for 30 minutes.

**Table S1.** Sources for starting materials and solvents.

| Reagent | Manufacturer |
| --- | --- |
| Zinc nitrate hexahydrate | ACROS Organics |
| Terephthalic acid | Alfa Aesar |
| Ethanol | CHEMSOLUTE |
| *N*,*N*-dimethylformamide | Honeywell |
| *N*,*N*-diethylformamide | Honeywell |
| Aluminum nitrate nonahydrate | CARL ROTH |

### Section S1.1: Synthesis of flavins

Flavins were prepared from the corresponding 2-methylamino-anilines by condensation with alloxan hydrate. *N*-Methylation of 2-nitro-anilines was performed by alkylation of the corresponding trifluoroacetamides with dimethylsulfate following a procedure by Brown and Rizzo [[[1]](#endnote-1)]. 10-Methyl-isoalloxazine (MIA) (Scheme S1) was prepared following a protocol reported by Imada, Murahashi and coworkers [[[2]](#endnote-2)]. 6-Fluoro-10-methyl-isoalloxazine (6F-MIA) (Scheme S1) [[[3]](#endnote-3)] was prepared following a modified protocol reported by Averill and co-workers [[[4]](#endnote-4)].

**Scheme S1**. 10‐Methyl‐isoalloxazine (MIA) and 6-fluoro-10-methyl-isoalloxazine (6F-MIA)

### Section S1.2: MOF syntheses and flavin incorporation

*Preparation of saturated MIA and 6F-MIA dye solutions*

The MIA or 6F-MIA dye was mixed in chloroform or DMF and dissolved for 30 min at 40 °C using ultrasound. When a clear homogeneous solution was obtained, this process was repeated until no more dye could be dissolved. The saturated chloroform solutions (*c*MIA = 69.5 mg∙L–1, *c*6F-MIA = 20.25 mg∙L–1; see Section S2) or DMF solutions (*c*MIA = 272 mg∙L–1, *c*6F-MIA = 2640 mg∙L–1; see Section S2) were then filtered at room temperature and used for the syntheses.

*Synthesis of MIL-53(Al) according to Alaerts et al. and Loiseau et al.* [[[5]](#endnote-5),[[6]](#endnote-6)]

Aluminum nitrate nonahydrate (3.75 g, 10.0 mmol), terephthalic acid (0.83 g, 5.0 mmol) and dist. water (7.16 mL) were mixed in a 60 mL Teflon-lined stainless-steel autoclave, which was heated at 220 °C for 72 h including a 3 h heating ramp and 3 h cooling ramp. After cooling to room temperature, the white raw product was washed three times with water (10 mL). The white solid was dispersed in DMF and heated under reflux to 160 °C for 48 h to remove the incorporated terephthalic acid from the pores. The product was finally washed three times with hot ethanol (10 mL each). Yield 46 %.

*10-Methyl-isoalloxazine (MIA) and 6-fluoro-10-methyl-isoalloxazine (6F-MIA) incorporation into MIL-53*

Post-synthetic wet infiltration was performed by adding 1 to 15 mL from the concentrated solutions of the dyes in chloroform to 20 mg activated powders of the microcrystalline MIL-53. After brief mixing, slow evaporation at room temperature was used to promote diffusion of the dyes into the MOF pores.

*MOF-5 single crystal synthesis according to Han et al. and Eddaoudi et al.* [[[7]](#endnote-7),[[8]](#endnote-8)]

Zinc nitrate hexahydrate (511 mg, 1.72 mmol) and terephthalic acid (96 mg, 0.58 mmol) were dissolved in dimethylformamide, DMF (5 mL). The solution was transferred to Pyrex tubes, which were placed in a programmable oven at 85 °C for 72 h including a 2.5 h heating ramp and 3.5 h cooling ramp. The colorless crystals obtained were washed with DMF (5 mL each) twice daily for three days and with ethanol (5 mL each) twice daily for another three days. After washing, the MOF-5 crystals were filtered and dried under vacuum (15 h at 120 °C). Yield 58 %. The MOF-5 were stored under nitrogen until further investigations.

*MOF-5 single crystal synthesis with 10-methyl-isoalloxazine (MIA)*

MIA (5.0 mg, 0.022 mmol) was added to DMF (5 mL) and sonicated at 60 °C for 30 min. The solution was then filtered to obtain a homogeneous MIA-saturated DMF solution with *c*MIA = 272 mg∙L–1 (Section S2). Zinc nitrate hexahydrate (175.5 mg, 0.59 mmol) and terephthalic acid (31.0 mg, 0.19 mmol) were dissolved in the MIA-DMF solution (5 mL). The solution was then placed in a programmable oven at 85 °C for 72 h including a 2.5 h heating ramp and 3.5 h cooling ramp. Yellow discolored cubic crystals were obtained. The crystals were washed three times with DMF (5 mL), filtered and dried under vacuum (15 h at 120 °C). Yield 42.3 mg (MIA@MOF-5), 39.9 mg MOF-5 after deduction of MIA content (see below), ~90% MOF-5 based on terephthalic acid. The dry MIA@MOF-5 composites were stored under nitrogen until further investigations. For longer storage (> 4 weeks), the non-washed crystals were stored in the mother liquor at 4 °C. When needed, the crystals were then worked up as described above.

The 10-fold diluted supernatant DMF solution gave an absorption at 436 nm of 0.892 from which a residual MIA concentration of 0.892/0.04467 = 19.97 mg L–1 (Figure S4), thus 199.7 mg L–1 for the original supernatant could be obtained. Hence, from 1.36 mg of MIA in 5 mL of the saturated MIA-DMF solution 1.00 mg of MIA was still present in the supernatant after MOF-5 formation or 0.36 mg MIA were incorporated in 39.94 mg MOF-5 (42.3 mg – 0.36 mg), representing 0.36 / (0.36+39.94) = 0.85 wt%.

*MOF-5 single crystal synthesis with 6-fluoro-10-methyl-isoalloxazine (6F-MIA)*

6F-MIA (20 mg, 0.081 mmol) was added to DMF (5 mL) and sonicated at 60 °C for 30 min. The solution was then filtered to obtain a homogeneous 6F-MIA-saturated DMF solution with *c*6F-MIA = 2640 mg∙L–1 (Section S2). Zinc nitrate hexahydrate (176.4 mg, 0.59 mmol) and terephthalic acid (32.6 mg, 0.20 mmol) were dissolved in the 6F-MIA-DMF solution (5 mL). The solution was then placed in a programmable oven at 85 °C for 72 h including a 2.5 h heating ramp and 3.5 h cooling ramp. Yellow discolored cubic crystals were obtained. The crystals were washed three times with DMF (5 mL), filtered and dried under vacuum (15 h at 120 °C). Yield 40.5 mg (6F-MIA@MOF-5), 29.3 mg MOF-5 after deduction of 6F-MIA, ~57% MOF-5 based on terephthalic acid.

The dry 6F-MIA@MOF-5 composites were stored under nitrogen until further investigations. For longer storage (> 4 weeks), the non-washed crystals were stored in the mother liquor at 4 °C. When needed, the crystals were then worked up as described above.

The 20-fold diluted supernatant DMF solution gave an absorption at 425 nm of 0.544 from which a residual 6F-MIA concentration of 0.544/0.0272 = 20.0 mg L–1 (Figure S8), thus 400 mg L–1 for the original supernatant could be obtained. Hence, from 13.2 mg of 6F-MIA in 5 mL of the saturated MIA-DMF solution 2.0 mg of 6F-MIA was still present in the supernatant after MOF-5 formation or 11.2 mg MIA were incorporated in 29.3 mg MOF-5 (40.5 mg – 11.2 mg), representing 11.2 / (11.2+29.3) = 27.6 wt%.

**Infrared (IR) spectra of flavin@MOF**

The Fourier transform infrared (FT-IR) spectra were collected with a Bruker Tensor 37 instrument with KBR or attenuated total reflection (ATR) technique.

The spectra are collected in Figure S1 and Figure S2.

(**a**)
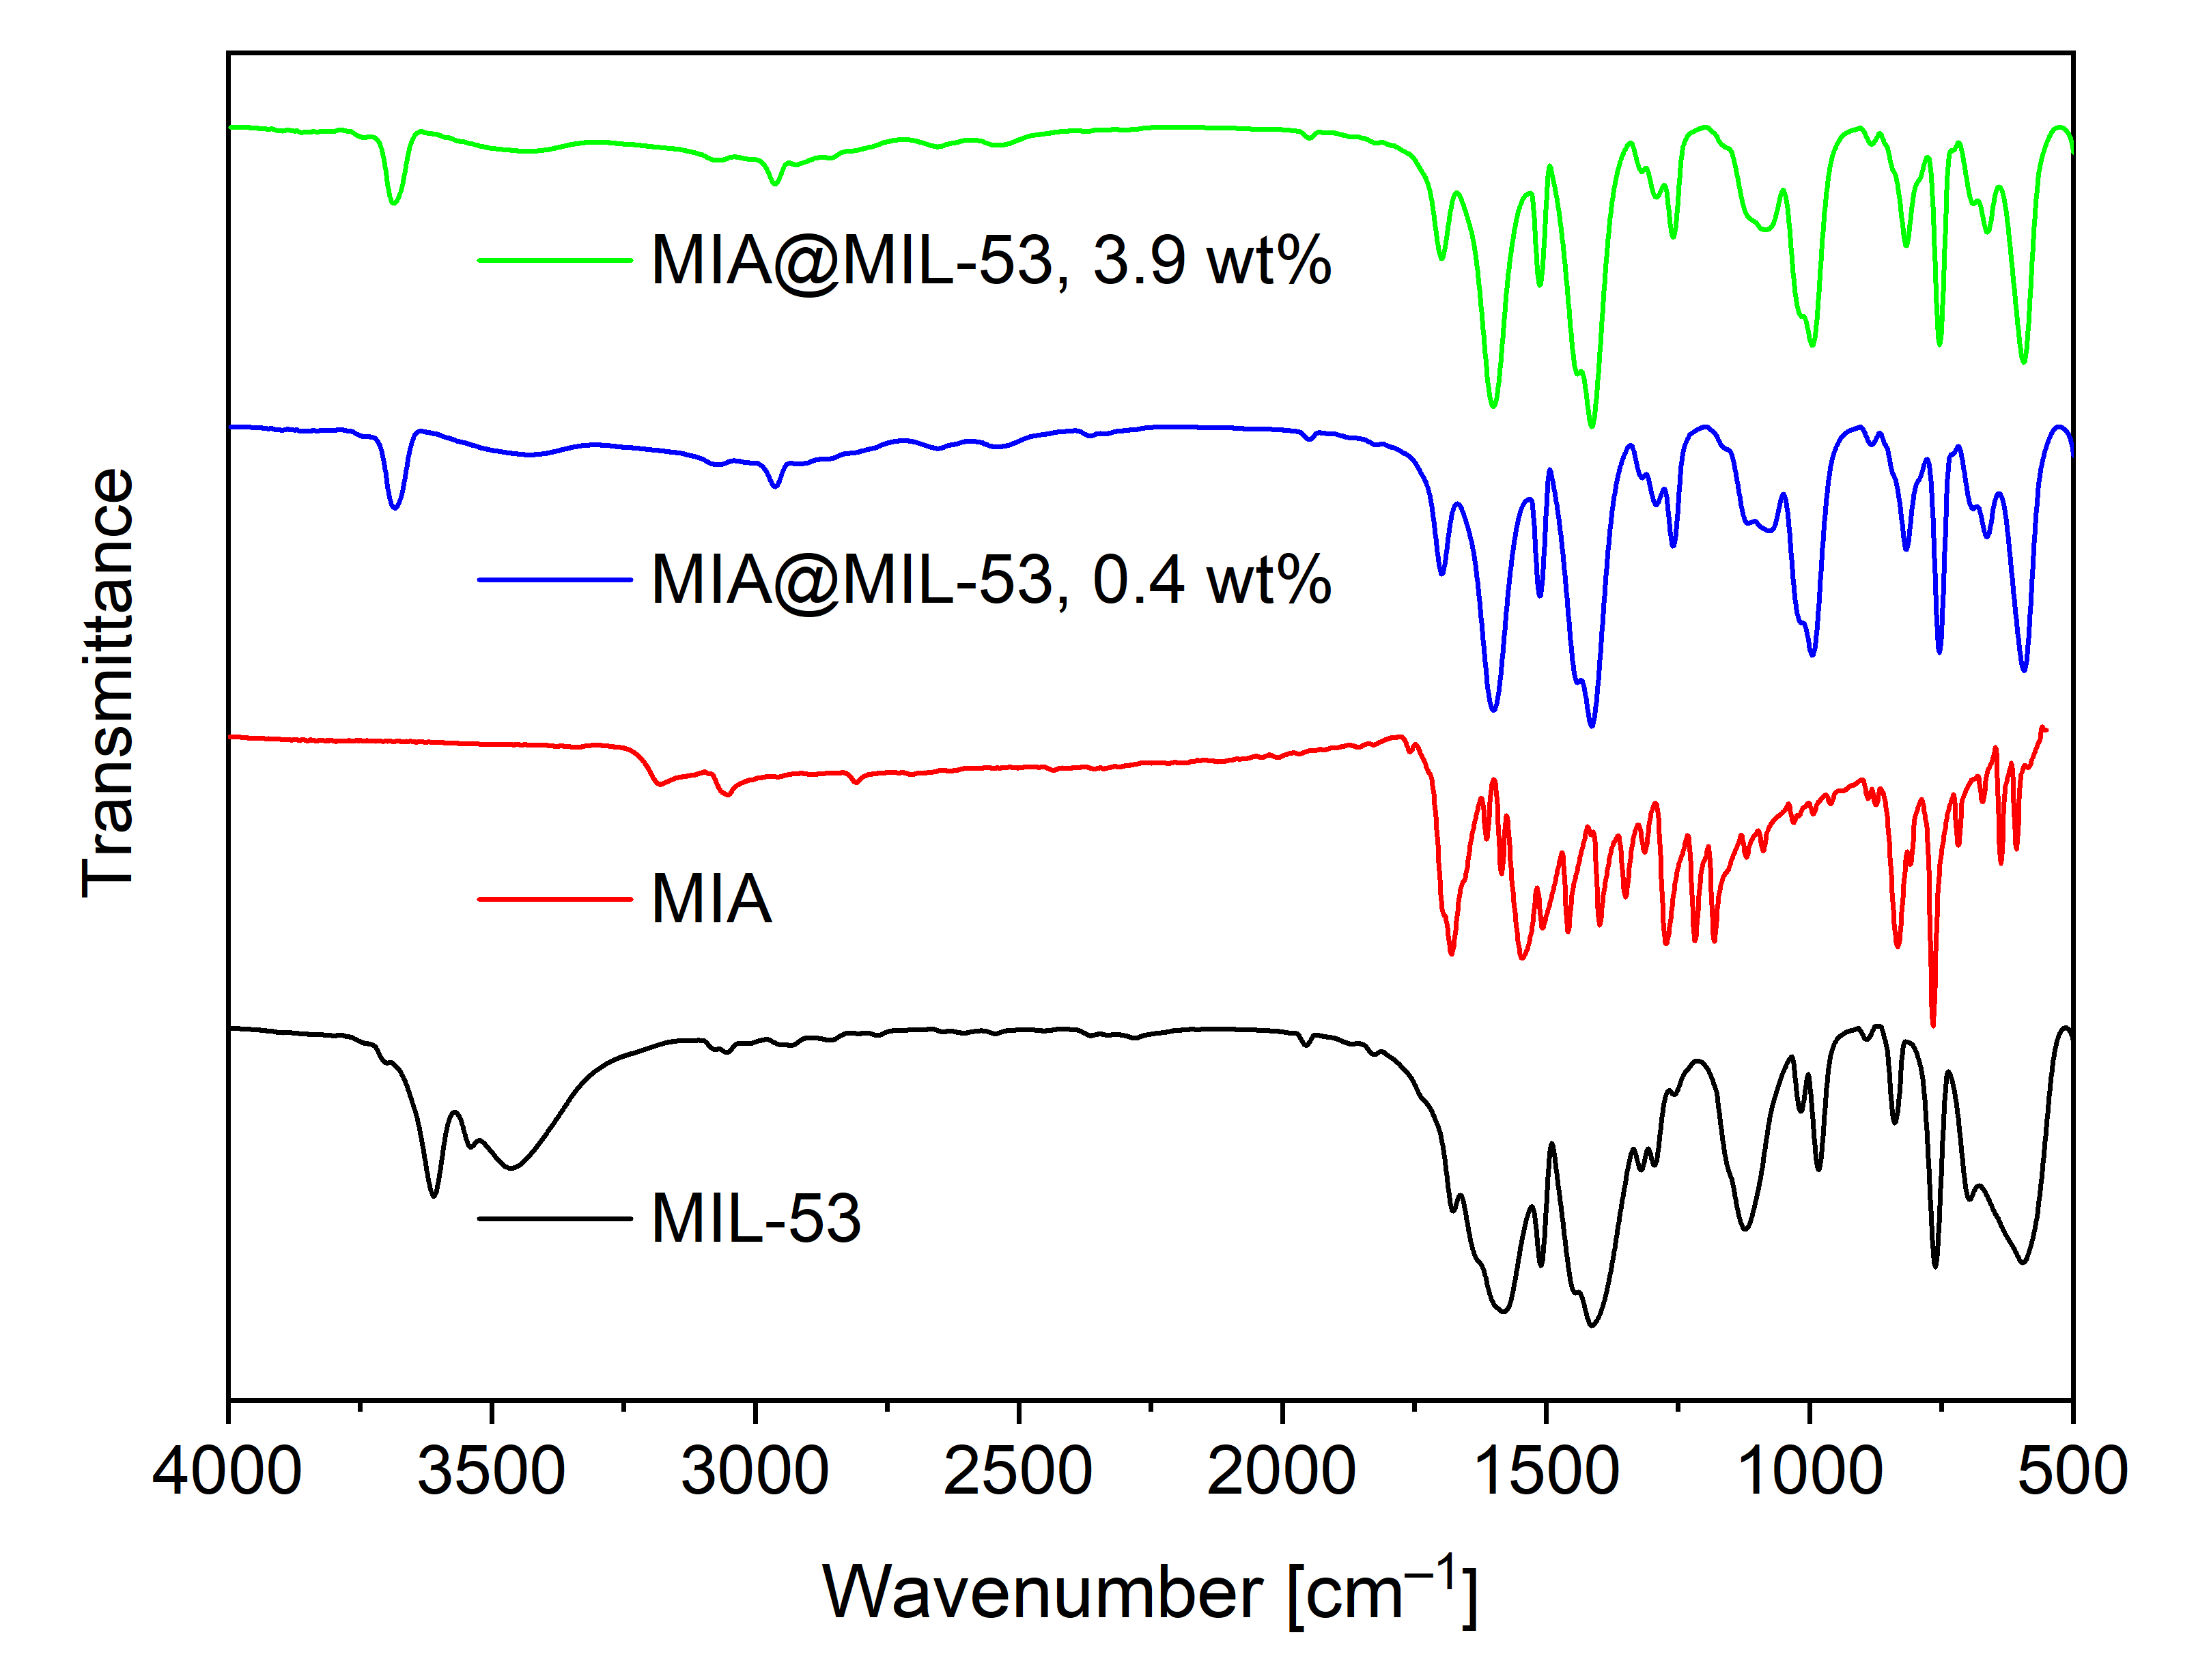


(**b**)
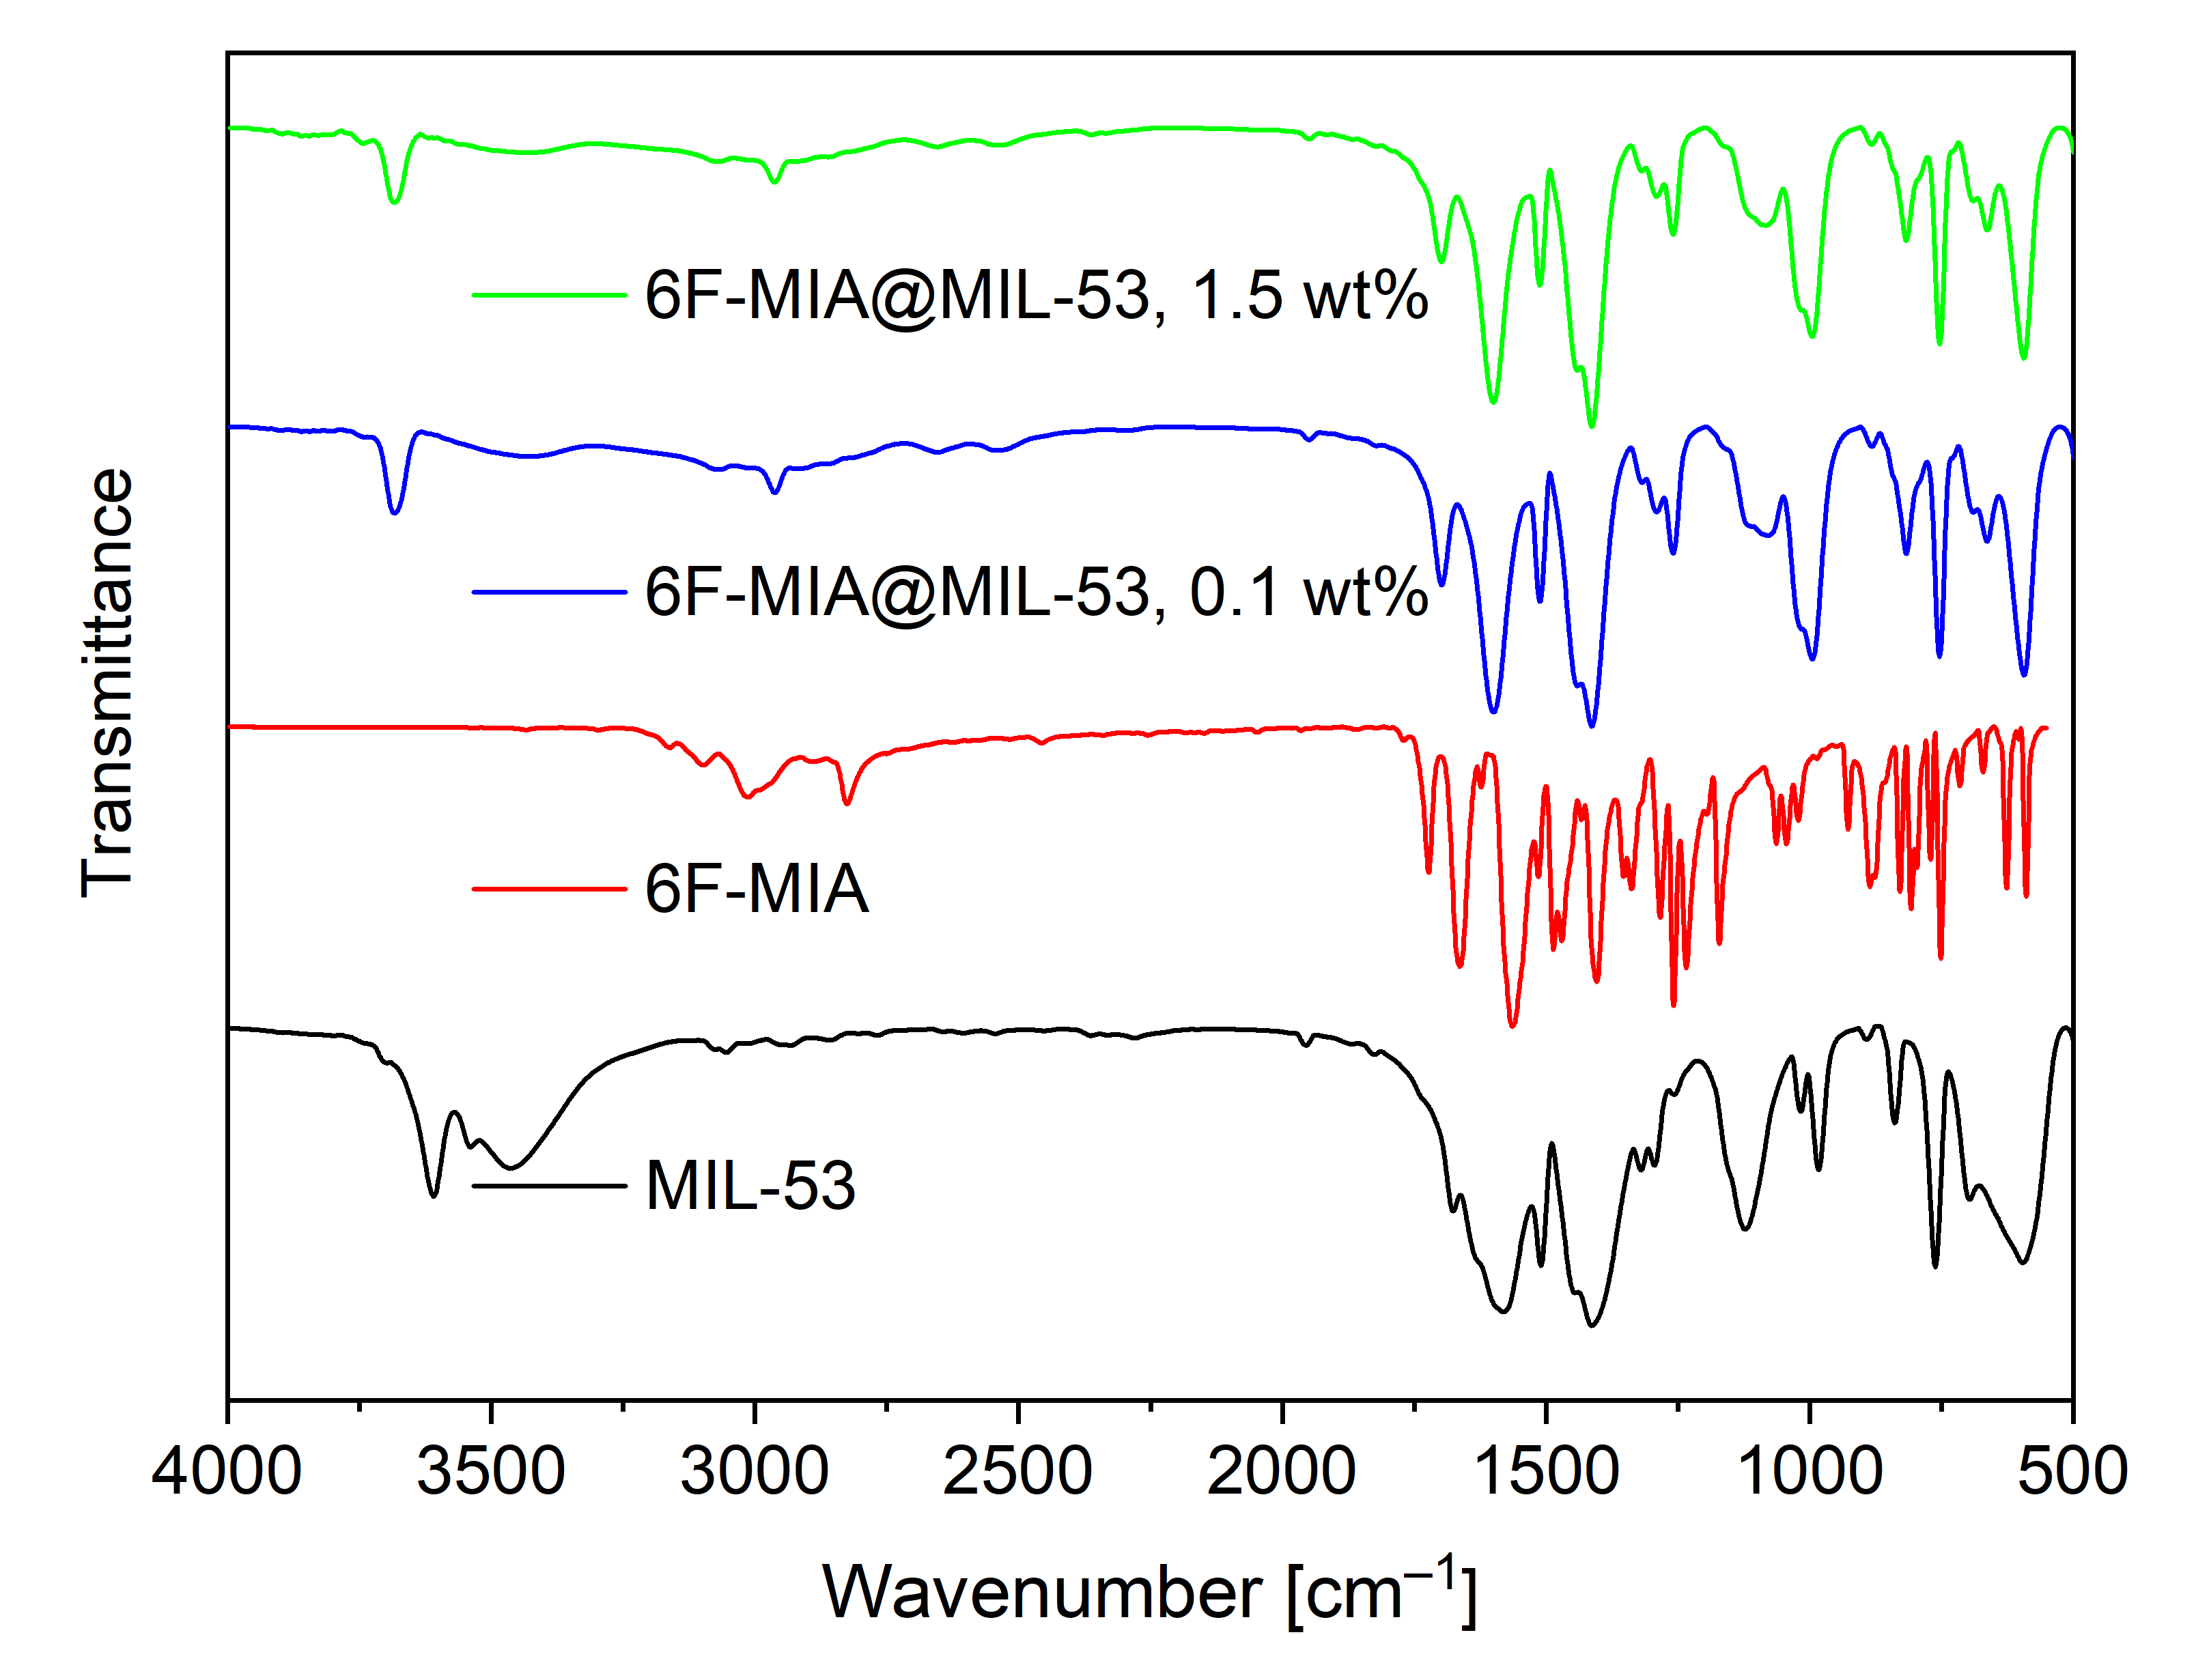


**Figure S1.** IR spectra of (**a**) MIL-53 (KBr), MIA (ATR) and MIA@MIL-53 (KBr) and (**b**) MIL-53 (KBr), 6F-MIA (ATR) and 6F-MIA@MIL-53 (KBr)

(**a**)
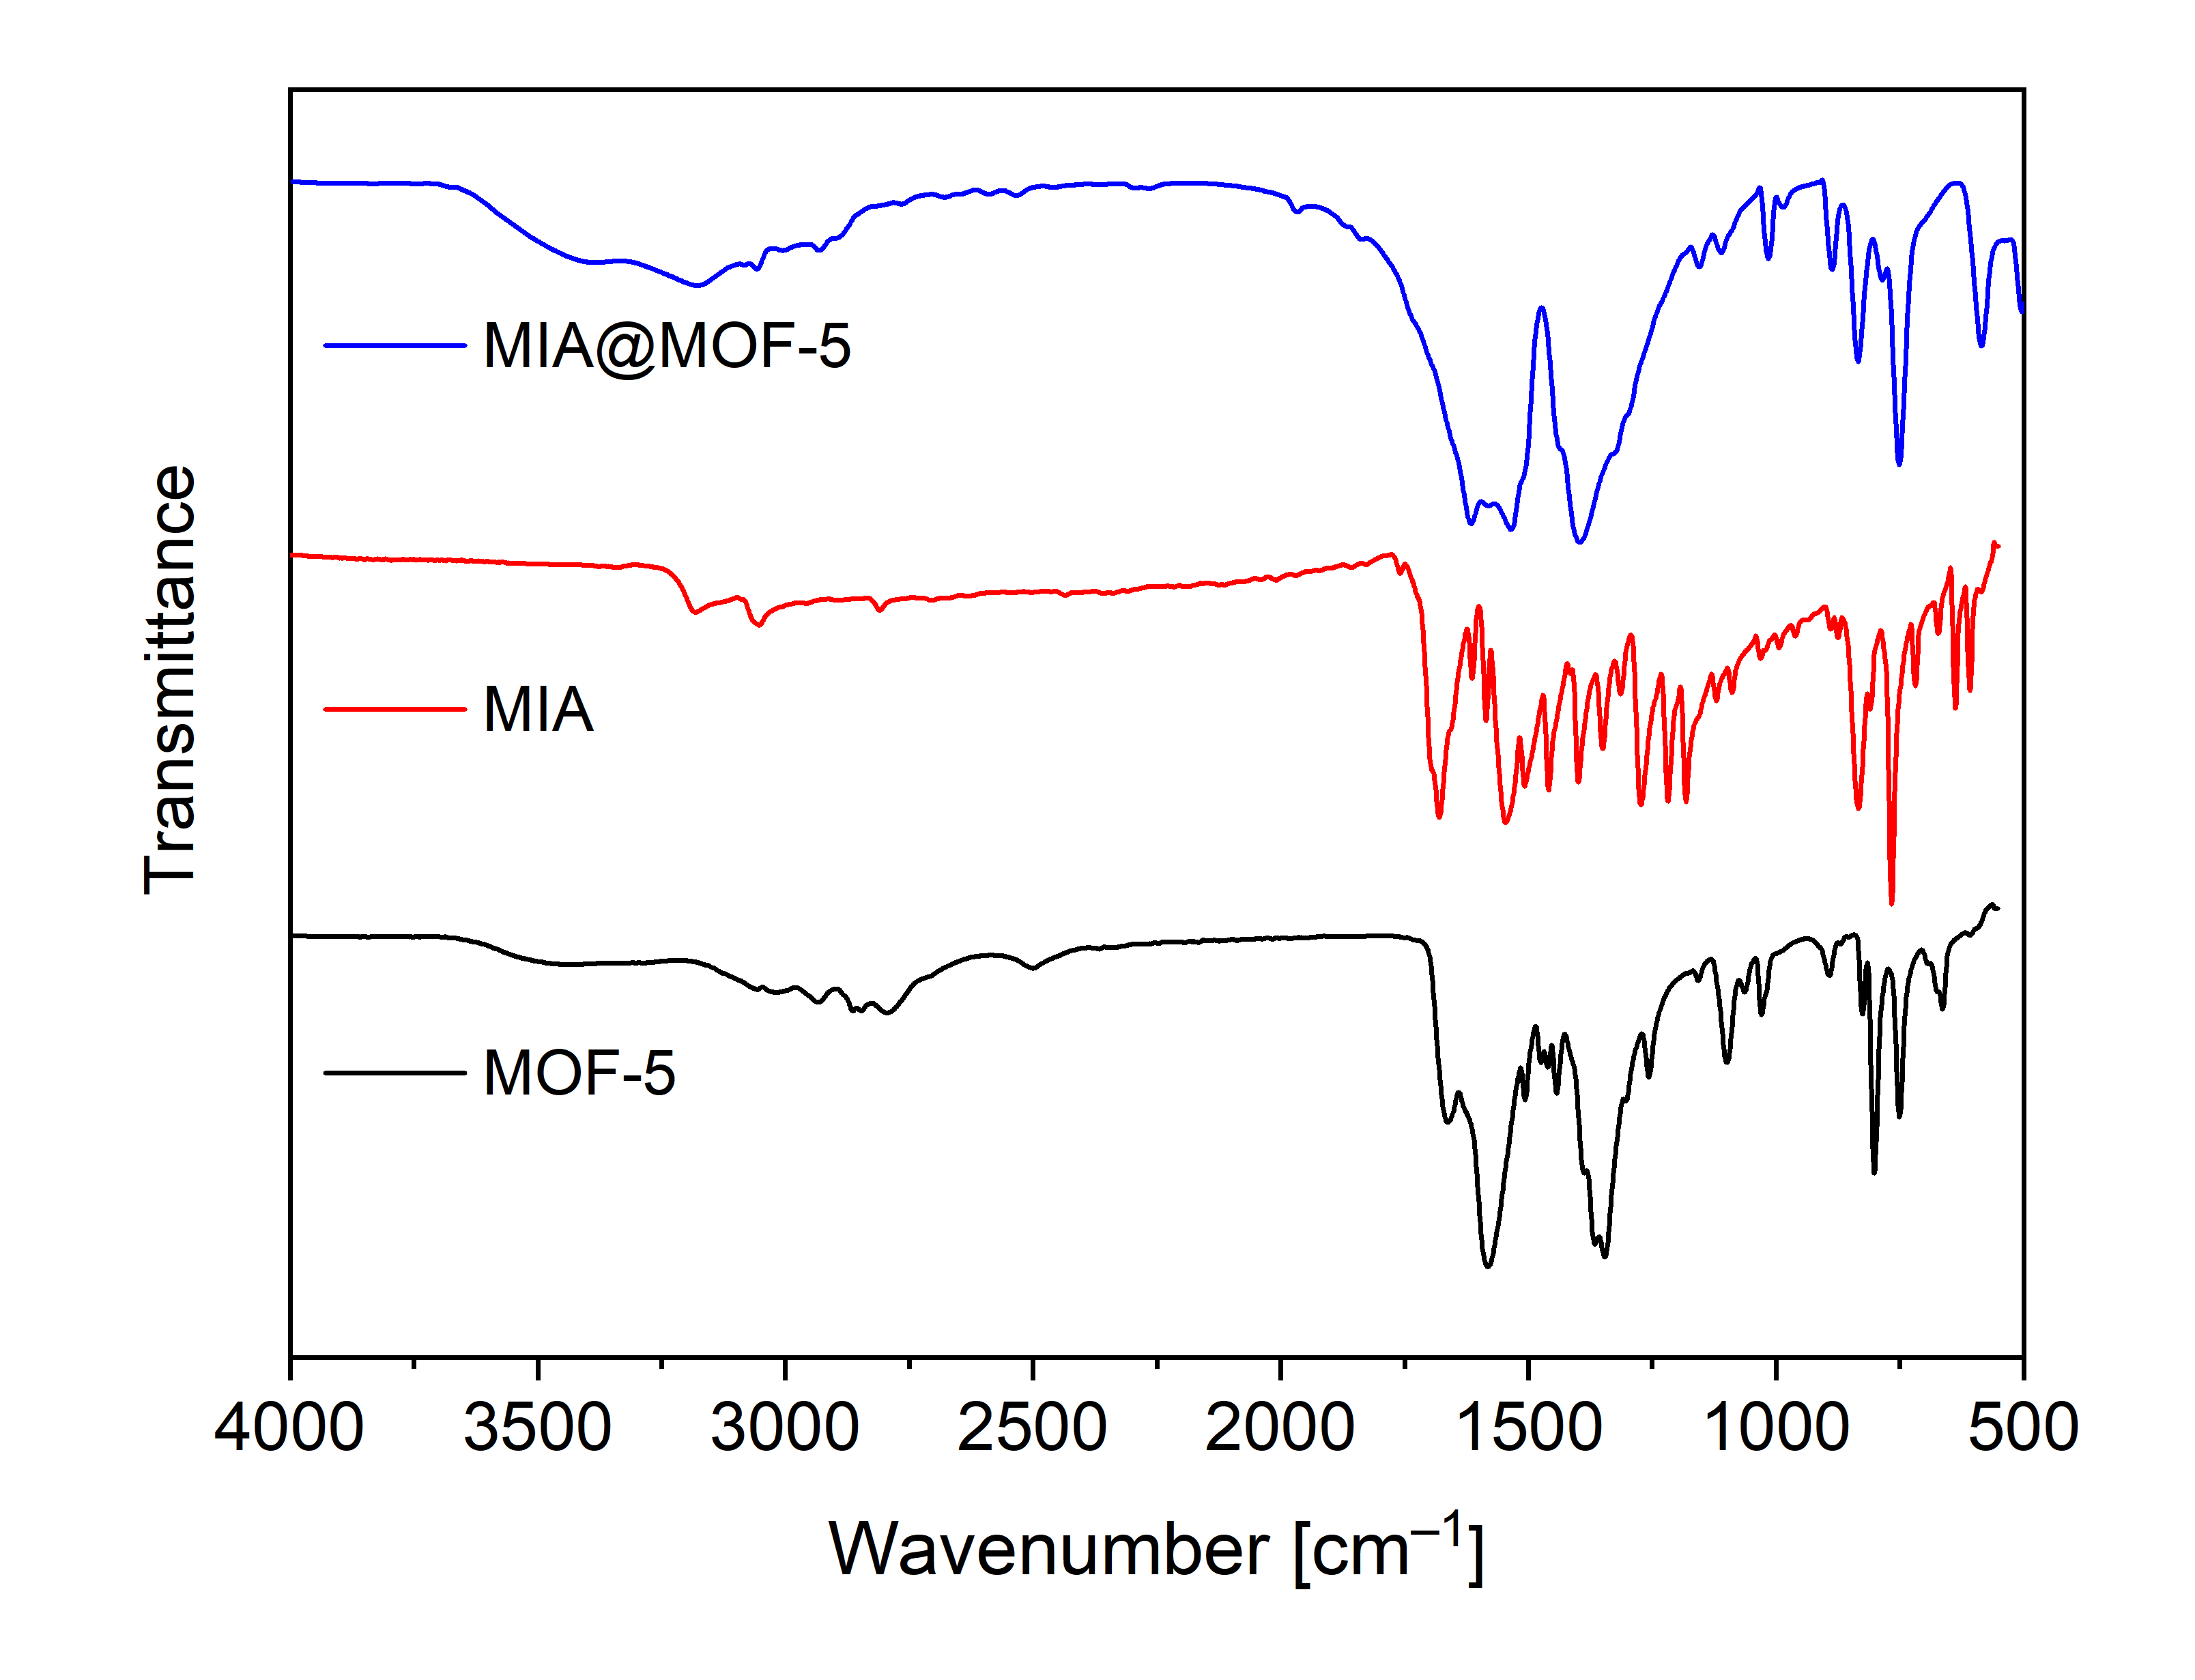


(**b**)
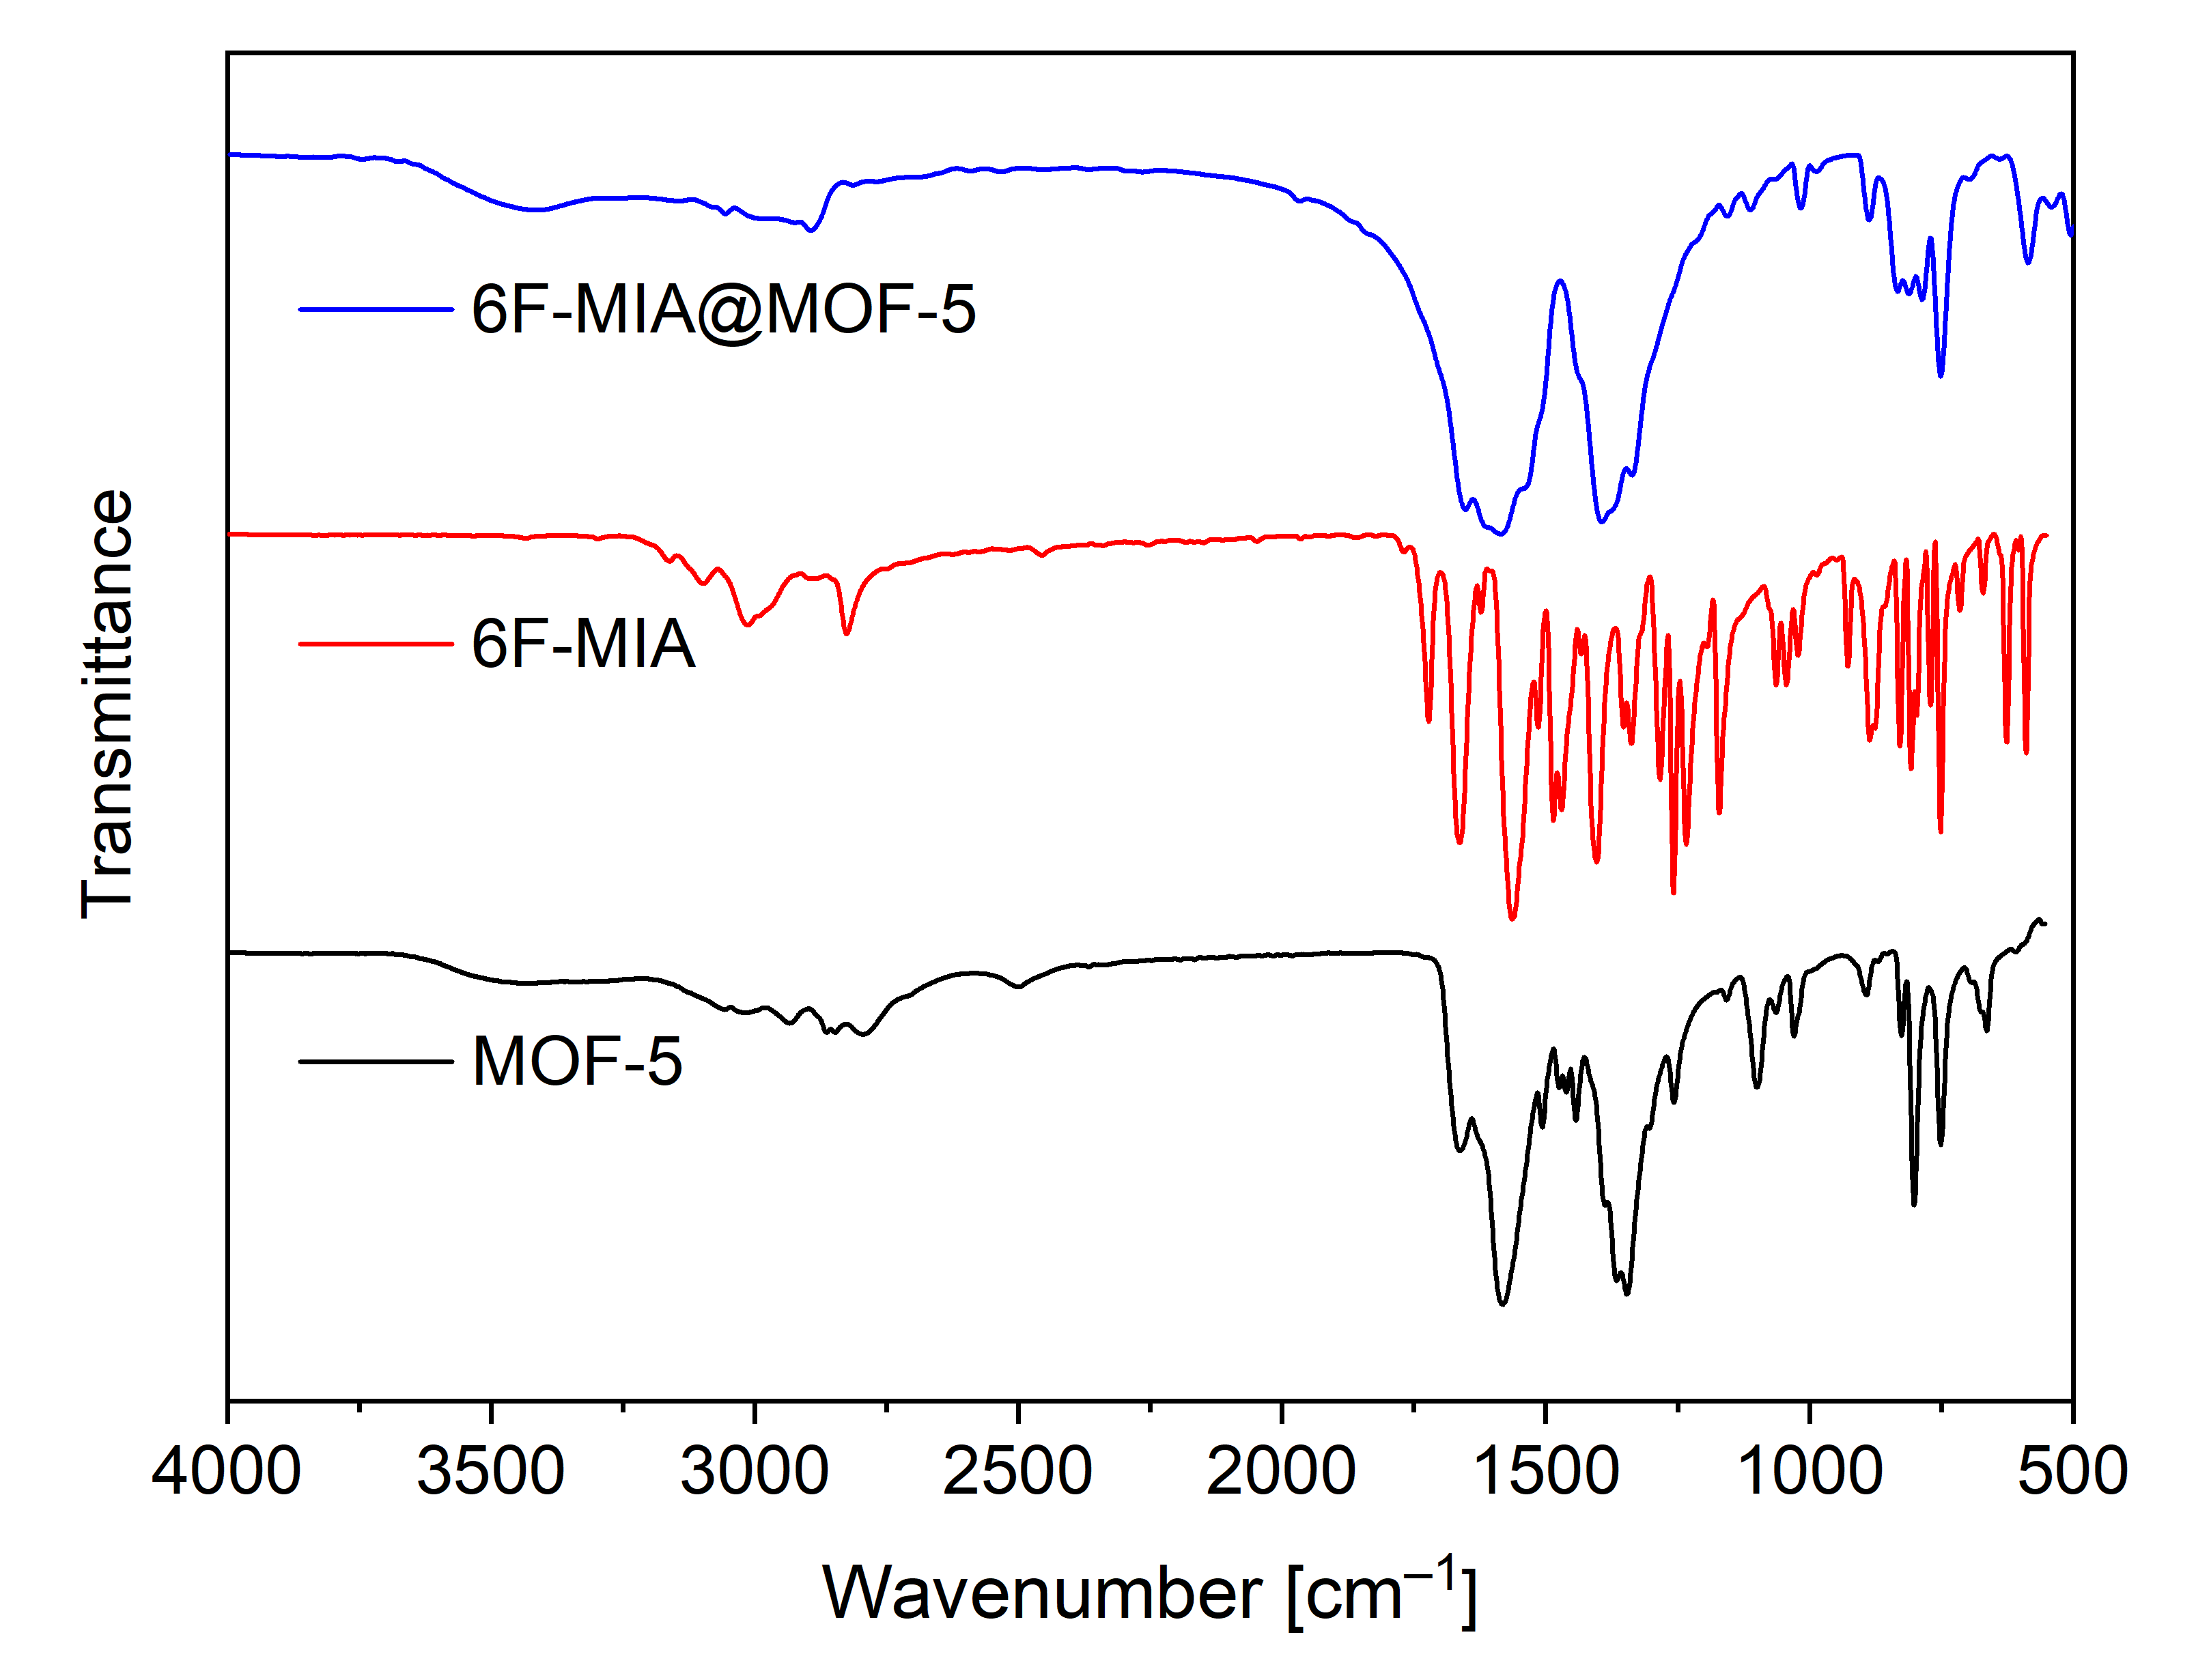


**Figure S2.** IR spectra of (**a**) MOF-5 (KBr), MIA (ATR) and MIA@MOF-5 (KBr) and (**b**) MOF-5 (KBr), 6F-MIA (ATR) and 6F-MIA@MOF-5 (KBr)

Neat MIL-53 features broad signals which we see as evidence for the superposition of the three MIL-53 phases MIL-53-as, MIL-53-np and MIL-53-lp (and intermediate phases) as is also evident from the powder X-ray diffractograms (cf. Figure S14a). In the flavin@MIL-53 composites the bands sharpen and become more distinct with all composites giving nearly identical spectra (Figure S1). This is due to the formation of the same phase from the sample preparation as KBr pellets. The superposition of the flavin bands and the low amounts of flavins in MIL-53 do not allow a detection of flavin bands in the composites.

MOF-5 on the other hand has more distinct bands in its neat form whereas in the composites the band between 1000 and 1750 cm–1 have considerably broadened (Figure S2). Distinct bands remain only in the region between 750 to 1000 cm–1 where C=C- and C-H-bending vibrations occur. Also, MIA and 6F-MIA have bands in the same region. Upon close inspection the flavin-only bands at 606 and 833 cm–1 (MIA) and 588 and 828 cm–1 (6F-MIA) are also localized in the composites (Table S2).

**Table S2.** Listing of IR wavenumbers of MOF-5, MIA, 6F-MIA and flavin@MOF-5 composites.

| Wavenumber  [cm–1] | MOF-5  (KBr) | MIA  (ATR) | MIA@MOF-5  (KBr) | 6F-MIA  (ATR) | 6F-MIA@ MOF-5 (KBr) |
| --- | --- | --- | --- | --- | --- |
| C=C bending,  C-H bending |  | 606 ++ | 590 ++ | 588 ++ | 586 ++ |
| 660 + | 636 ++ |  | 625 ++ |  |
| 750 ++ | 765 +++ | 751 +++ | 750 +++ | 750 +++ |
| 800 +++ |  |  | 808 ++ | 810 ++ |
|  |  |  | 828 ++ | 835 ++ |
|  | 833 ++ | 837 ++ |  |  |
| 892 + |  | 889 + | 885 ++ | 887 + |
| 1025 + |  | 1012 + |  | 1014 + |
| 1096 ++ |  |  |  |  |
| C-H stretching, O-H bending | 1250-1450 +++, b (1343) | 1216 ++ | 1230-1470 +++, b (1390) | 1257 +++ | 1250-1470 +++, b (1390) |
| C-H/O-H stretching | 1450-1670 +++, b (1578) | 1454 +++ | 1470-1750 +++, b (1531,1616) | 1564 +++ | 1480-1750 +++, b (1585) |
|  |  | 1680 ++ |  | 1722 ++ |  |
|  | 2495 + |  |  |  |  |
| C-H/O-H stretching | 2790-3100 +, b | 2800-3180 +, b | 2925-3530 +, b (3175) | 2823 + | 2900-3400 +, b |
|  |  |  |  | 3010 + |  |

### Section S2: MIA and 6F-MIA absorption spectra and calibration curves (Figure S3 - Figure S10)

For the concentration determination of the saturated solution of MIA in DMF, a stock solution with a concentration of 100 mg∙L–1 MIA in DMF was prepared, diluted to lower concentrations and measured by UV/Vis spectroscopy (Figure S3).





**Figure S3.** UV/Vis spectra of differently concentrated solutions of MIA in DMF in the range from 370 to 500 nm.

Using the maxima of the absorption spectra at 436 nm, a calibration curve was derived (Figure S4).

**Figure S4.** Calibration line for MIA in DMF from the absorbance at 436 nm.

The concentration of the **saturated MIA-DMF solution** was determined as follows: The saturated MIA-DMF solution was diluted by a factor of 1:10 to obtain an absorbance at 436 nm of 1.214 within the calibration range giving a concentration of 27.2 mg L–1 for the tenfold-diluted solution. Taking this dilution into account, a concentration of 272 mg∙L–1 was calculated for the saturated MIA-DMF solution.

For the concentration determination of the saturated solution of MIA in chloroform, a stock solution of 4 mg∙L–1 of MIA in chloroform was prepared and diluted. This was followed by the recording of the UV/Vis spectra of the solution series (Figure S5).

**Figure S5.** UV/Vis spectra of differently concentrated solutions of MIA in chloroform in the range from 370 to 500 nm.

From the absorbance maxima at 440 nm the calibration curve was obtained (Figure S6).

**Figure S6.** Calibration line for MIA in chloroform from the absorbance at 440 nm.

Subsequently, the concentration of the **saturated MIA-CHCl3 solution** was determined as follows: The saturated MIA-CHCl3 solution was diluted by a factor of 1:25 to obtain an absorbance at 440 nm of 0.078 within the calibration range giving a concentration of 2.78 mg L–1 for the 25-fold-diluted solution. Taking this dilution into account, a concentration of 69.5 mg∙L–1 was calculated for the saturated MIA-CHCl3 solution.

To determine the concentration of the saturated solution of 6F-MIA in DMF, a stock solution with a concentration of 100 mg∙L–1 of 6F MIA in DMF was prepared and the UV/Vis-spectra were recorded for the dilution series (Figure S7).





**Figure S7.** UV/Vis spectra of different concentrated solutions of 6F-MIA in DMF in the range from 370 to 500 nm.

From the absorbance maxima at 435.5 nm the calibration curve was obtained (Figure S8).

**Figure S8.** Calibration line for 6F-MIA in DMF from the absorbance at 435.5 nm.

The concentration of the **saturated 6F-MIA-DMF solution** was determined as follows: The saturated 6F-MIA-DMF solution was diluted by a factor of 1:50 to obtain an absorbance at 435.5 nm of 1.436 within the calibration range giving a concentration of 52.8 mg L–1 for the 50-fold-diluted solution. Taking this dilution into account, a concentration of 2640 mg∙L–1 was calculated for the saturated 6F-MIA-DMF solution.

The concentration of the saturated solution of 6F-MIA in chloroform was determined by starting from a solution with a concentration of 2.4 mg∙L–1 6F MIA in chloroform, from which a dilution series was prepared and the UV/Vis spectra were recorded (Figure S9).

**Figure S9.** UV/Vis spectra of differently concentrated solutions of 6F-MIA in chloroform in the range from 370 to 500 nm.

The calibration line was derived from the maxima of the absorption at 440 nm (Figure S10).

**Figure S10** Calibration line for 6F-MIA in chloroform from the absorbance at 440 nm.

Subsequently, the **saturated 6F-MIA-CHCl3 solution** was diluted by a factor of 1:12.5 to obtain an absorbance at 440 nm of 0.045 within the calibration range giving a concentration of 1.62 mg L–1 for the 12.5-fold-diluted solution. Taking this dilution into account, a concentration of 20.25 mg∙L–1 was determined for the saturated 6F-MIA-CHCl3 solution.

### Section S3: Structure descriptions (Figure S11 - Figure S14)

### Section S3.1: Structure of 10‐methyl‐isoalloxazine (MIA) (Figure S11)


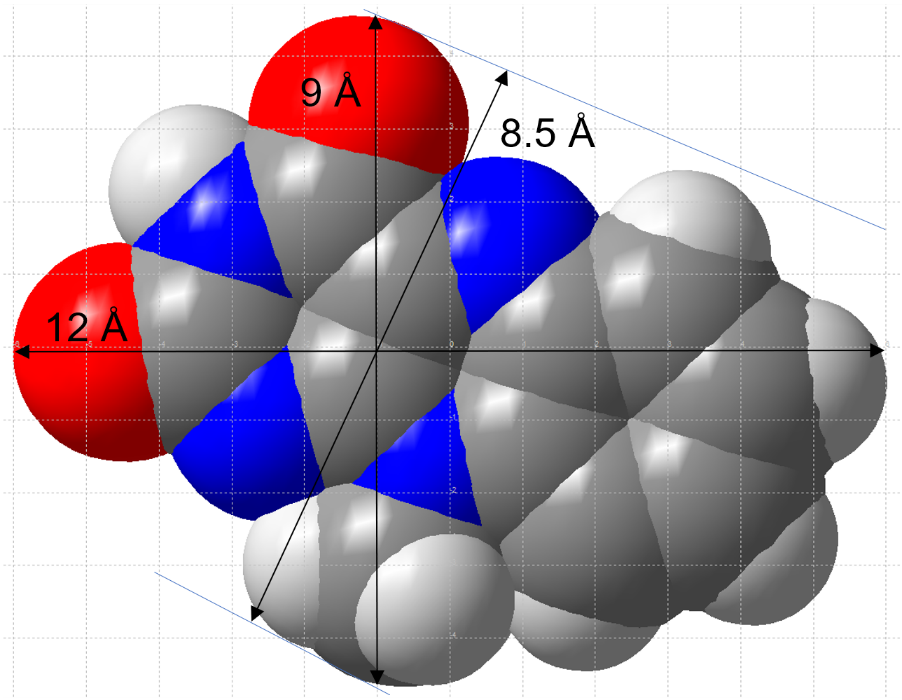

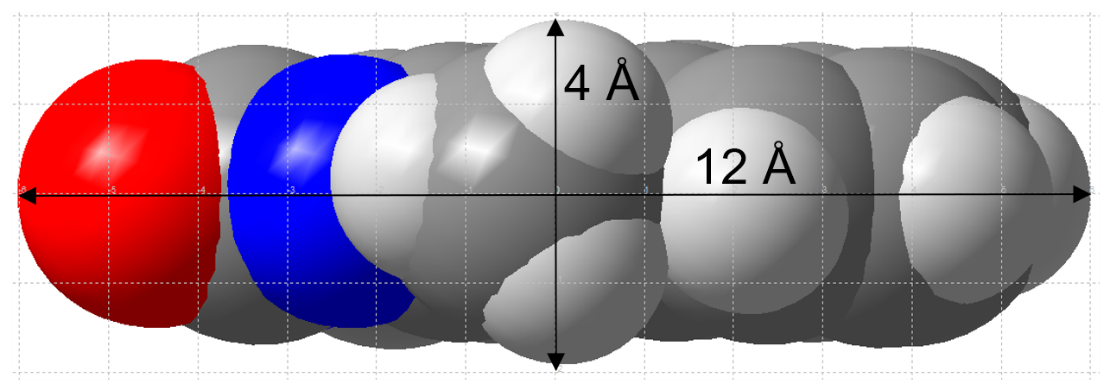


**Figure S11.** Top view and side view of a 10‐methyl‐isoalloxazine (MIA) molecule in space-filling presentation with the molecular dimensions indicated (the grid unit is 1 Å). (Structures were drawn with Diamond [[[9]](#endnote-9)] from the deposited cif file under CCDC-no./Refcode MISALX [[[10]](#endnote-10)]).

### Section S3.2: Additional structure description of MIL-53(Al) (Figure S12 and Figure S13)

The MIL-53(Al) structure with the formula unit [Al(OH)(bdc)] (bdc = benzene-1,4-dicarboxylate, terephthalate) is a very flexible, 'breathing'-type network, that is, it can assume different shapes and porosities depending on the presence or absence of host-guest interactions (Figure S12) [5,[[11]](#endnote-11)]. The secondary or here infinite building unit (SBU, IBU) in MIL-53 is a linear chain of {MO6} octahedra (M = Al, In, Ga, Cr, Fe) The Al3+ centers are octahedrally coordinated by terephthalate linkers and bridging µ-OH groups, giving chains of trans-µ-OH-connected vertex-bridged {AlO6} octahedra. The hydroxido-bridging and carboxylate-bridging occurs along the direction of the metal chains (Figure S12a). These chains are connected perpendicular to the chain direction through the ditopic terephthalate linkers to a three-dimensional network with channels running parallel to the {MO6} chains (Figure S12b). Each benzene-1,4-dicarboxylate ligand bridges between four Al atoms. This forms a three dimensional network consisting of rhombic-shaped channels with a significant breathing effect [5,11,[[12]](#endnote-12),[[13]](#endnote-13),[[14]](#endnote-14),[[15]](#endnote-15),[[16]](#endnote-16),[[17]](#endnote-17),[[18]](#endnote-18)].

MIL-53 can be found in three different crystalline forms which are usually differentiated as MIL-53*as*, MIL-53*ht* = MIL-53*lp* and MIL-53*lt* = MIL-53*np* with *as* = *as synthesized*, *ht* = *high temperature* *lp* = *large pore*, *lt* = *low temperature* and *np* = *narrow pore* (Figure S12). After the hydrothermal synthesis as-synthesized MIL-53-as is obtained. By heating to a temperature between 275 °C and 420 °C (without vacuum), MIL-53 can be activated by the removal of guest molecules. This leads to the large-pore (lp) structure MIL-53-lp. Upon the uptake of water molecules from the air at ambient conditions, the narrow-pore (np) MIL-53-np is formed (Figure S12). The transformation between MIL-53-lp to MIL-53-np is reversible and is commonly referred to as the ‘breathing effect’. For the large-pore (lp) form the diagonals for the rhombohedral channel cross section are 8.4 x 12 Å (Figure S13). When incorporating the flavin derivatives, the MIL-53-lp form can be used as the van-der-Waals dimensions of MIA molecules are approximately 4 × 8.5 × 12 Å (Figure S11) with the width of 8.5 Å being the critical dimension for the diffusion through the rhombohedral MIL-53 channels.

(**a**)
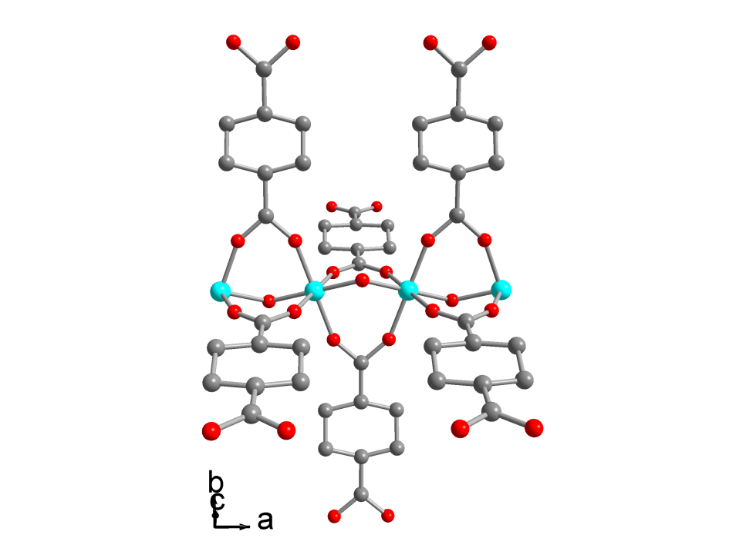

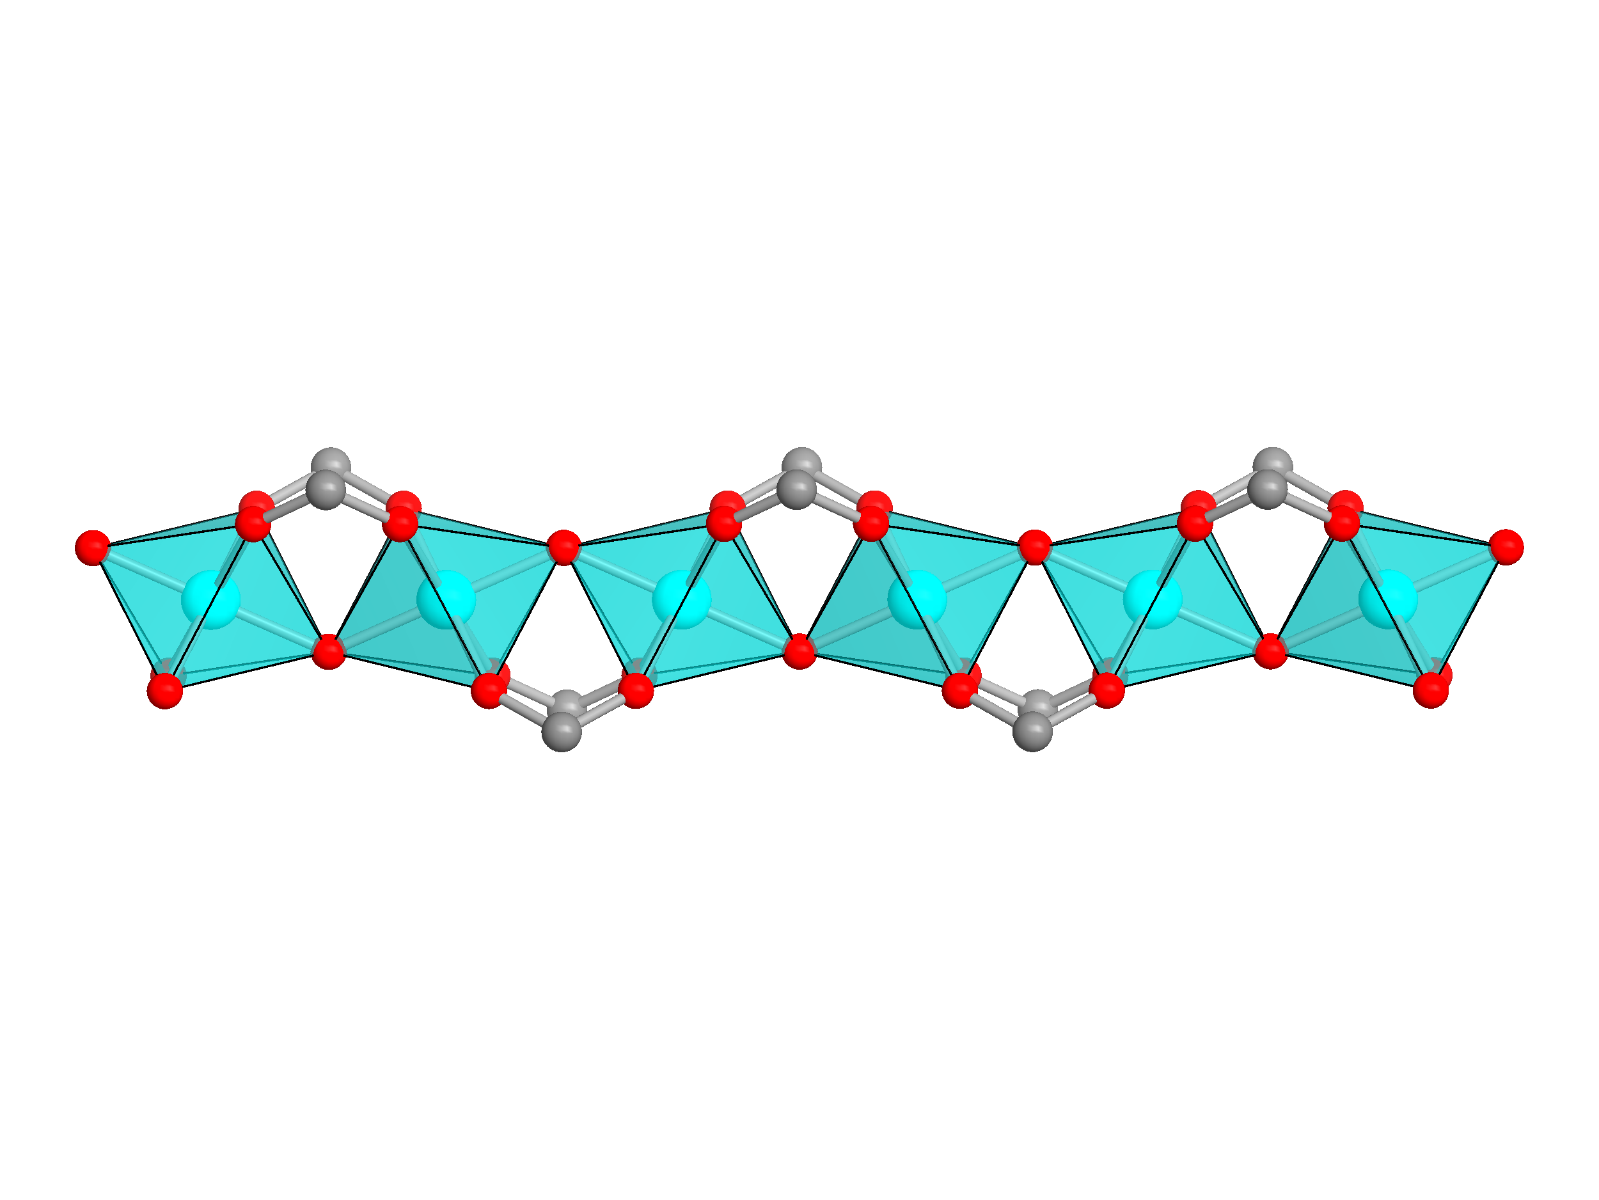


(**b**)


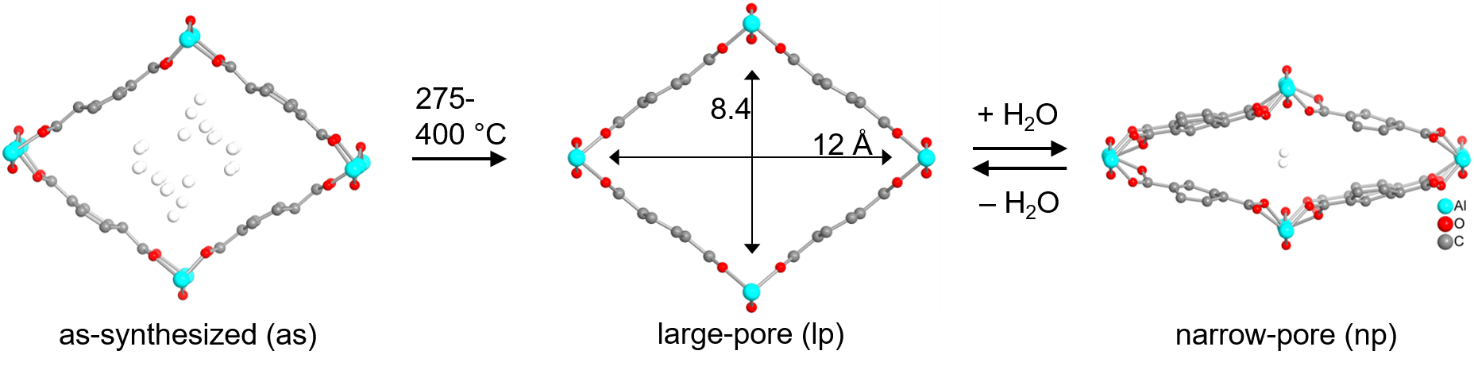


**Figure S12.** (**a**) Terephthalato- and hydroxido-bridged metal strand of [Al(OH)(bdc)] as an infinite subunit. (**b**) Sections of the packing diagram with a flexible, ‘breathing’ network adapting to guest molecules. The pore structures of MIL-53(Al) are viewed along the channel direction. The channels can contain guest molecules in the as-synthesized or narrow-pore form or be empty in the similar large-pore structure. The as-synthesized, and the narrow-pore form also indicate the (disordered) guest molecules (hydrogen atoms are not shown). The high temperature for the transition from as-synthesized to large-pore form is due to the removal of residual terephthalic acid. The dimensions along the diagonals of the rhombic opening include the van-der-Waals radii of the atoms (see also Figure S13) . Adsorption of water from air at room temperature transforms the structure into the narrow-pore / low-temperature form (right). Hydrogen atoms are not shown. (Structure images were drawn with Diamond [9] from the deposited cif files under CCDC-no./CSD-Refcodes 220475/SABVOH for MIL-53-as, 220476/SABVUN for -MIL-53-lp and 220477/SABWAU for MIL-53-np [6]).


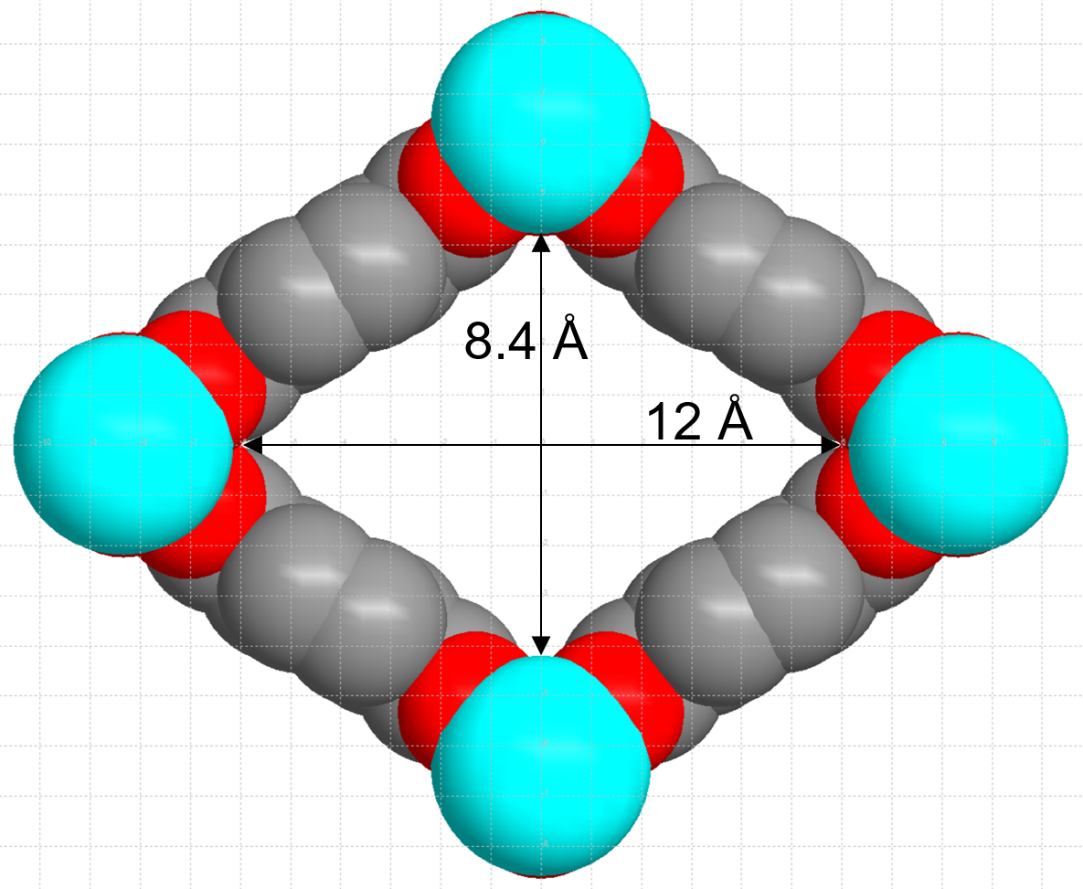


**Figure S13.** MIL-53(Al)-lp (large pore) in space-filling mode viewed along the channel direction. The dimensions along the diagonals of the rhombic opening include the van-der-Waals radii of the atoms (the grid unit is 1 Å).

### Section S3.3: Additional structure description of MOF-5 (Figure S14)

MOF-5 (also named IRMOF-1), [Zn4O(bdc)3] with bdc = benzene-1,4-dicarboxylate, terephthalate) is one of the best known and prototypical MOFs [19]. The structure of MOF-5 is constructed of tetrahedral {Zn4O} secondary building units where six carboxylate groups of the terephthalate linkers span the six edges of the {Zn4O} tetrahedron in an octahedral fashion to give a 3D primitive cubic (**pcu**) structure with orthogonal channels along each axis of a cartesian coordinate system with channel cross-sections (window size) of 8 × 8 Å and a pore diameter of 15 Å (Figure S14) [8]. Activated MOF-5 has a high surface area (3000 m2/g) and high thermal stability (up to 400 °C) [[[19]](#endnote-19)].

(**a**)

(**b**)
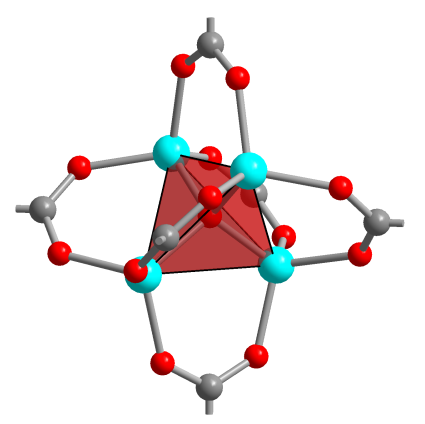

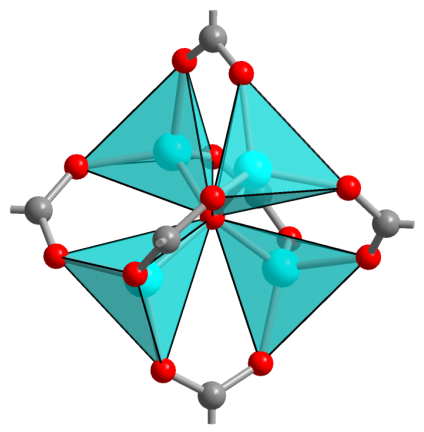

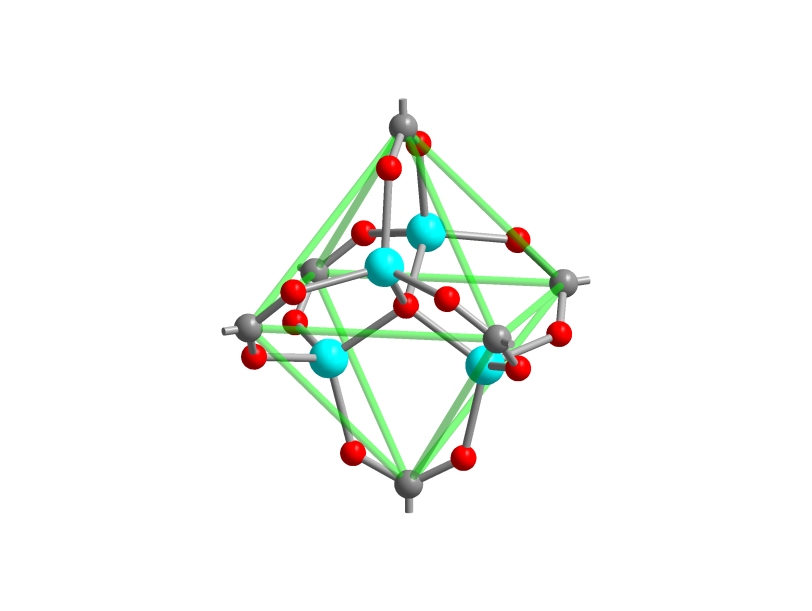


(**c**)
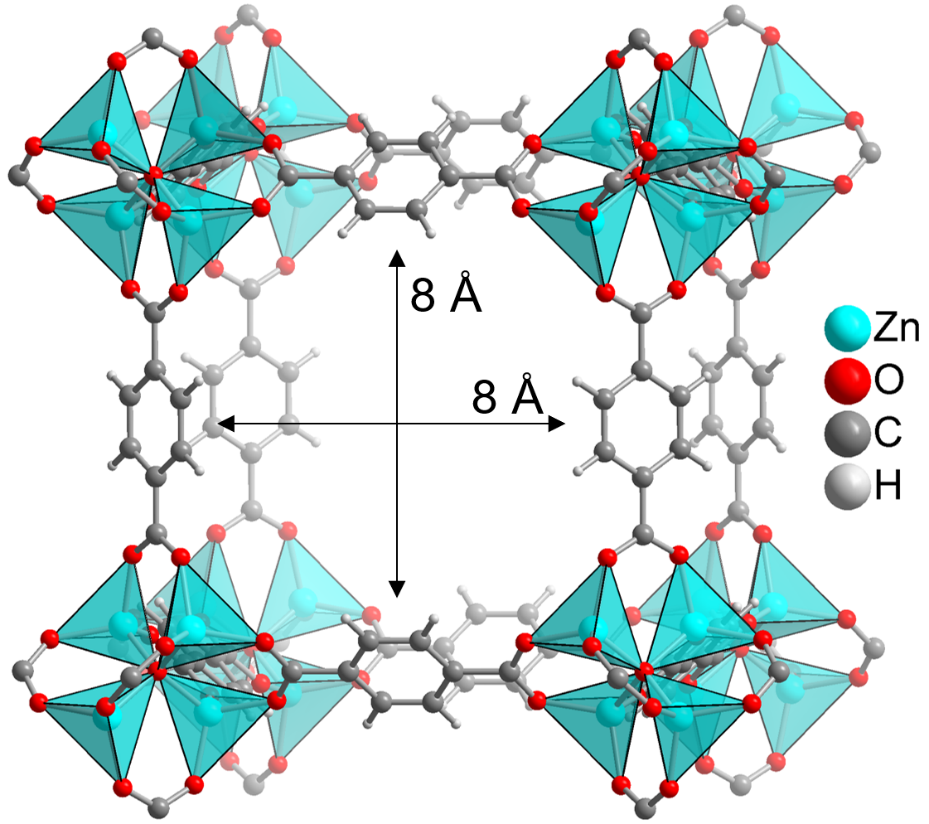

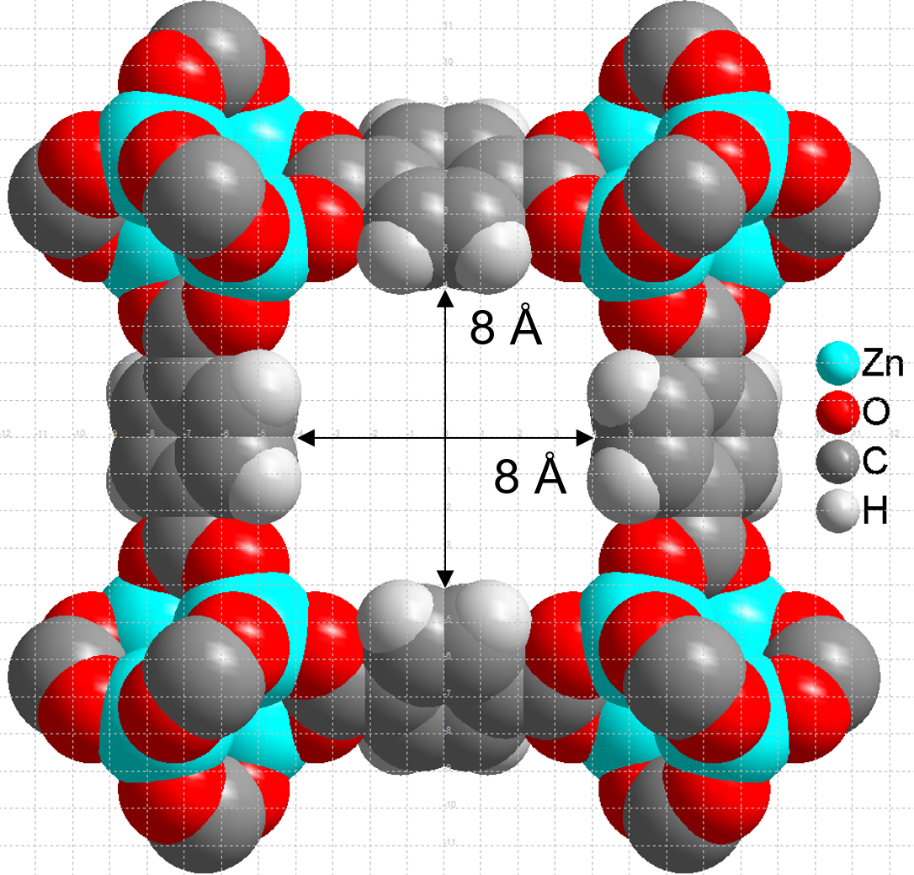


(**d**)
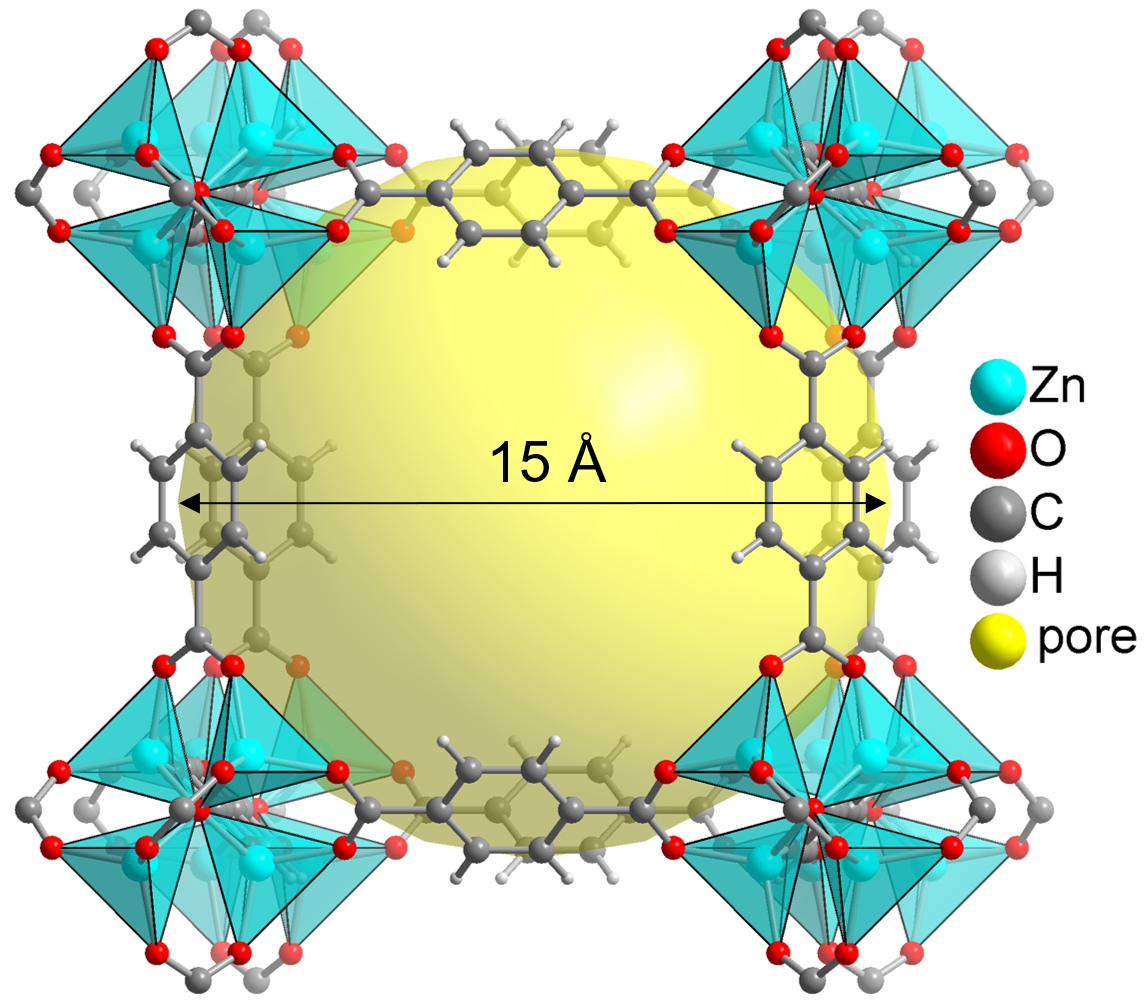

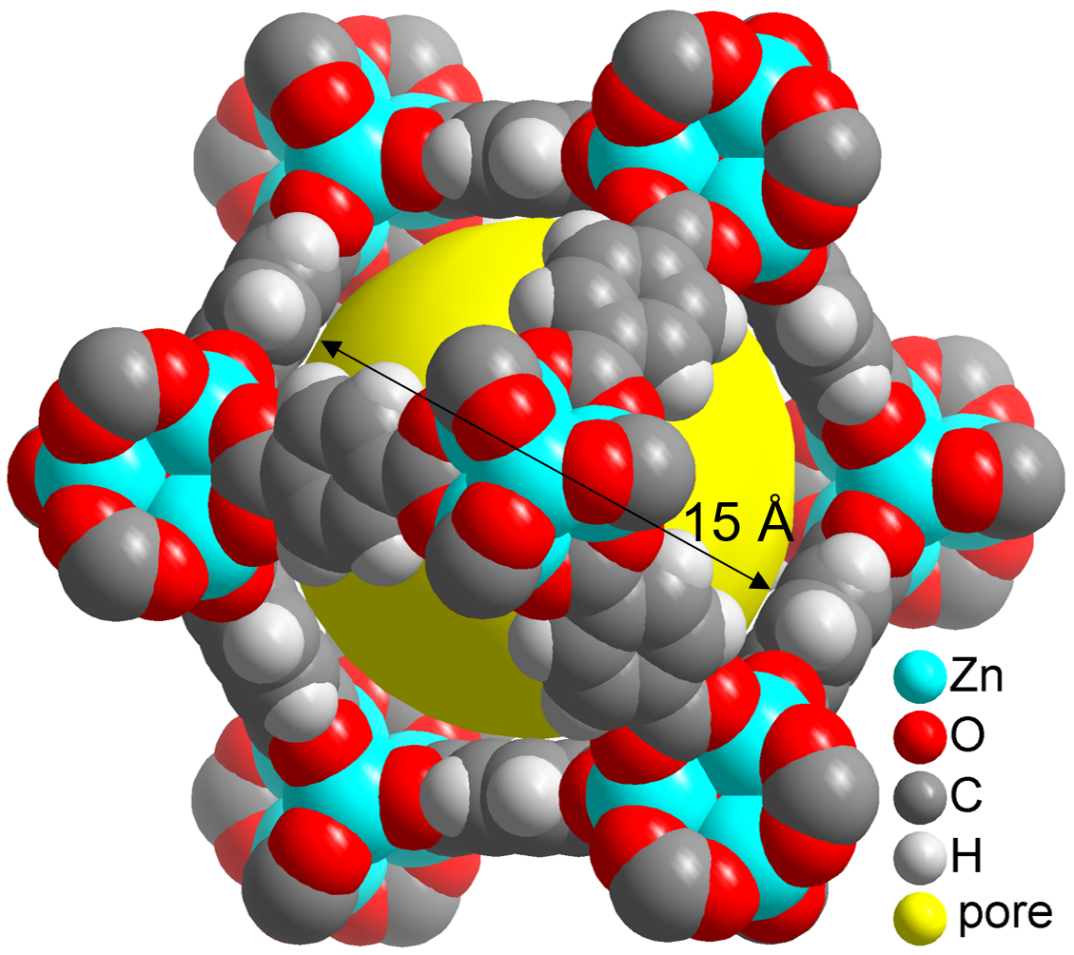


**Figure S14.** (**a**) Benzene-1,4-dicarboxylate, terephthalate, bdc and µ4-oxido bridged tetranuclear zinc cluster as building blocks for MOF-5 (IRMOF-1), 3D-[Zn4O(bdc)3].

(**b**) {Zn4O} SBU with six carboxylate groups in MOF-5, emphasizing the tetrahedral environment of the central µ-oxido atom, the tetrahedral Zn coordination and the carboxylate carbon atom positions at the vertices of an octahedron.

(**c**) Section of the MOF-5 **pcu** framework in ball-and-stick and space-filling mode viewed along one of channel directions. The edge-to-edge dimensions of the square opening (cross-section) of 8 × 8 Å extend to the van-der-Waals radii of the atoms (the grid unit is 1 Å). (**d**) The pore diameter of 15 Å extends to the van-der-Waals surface of the framework atoms. At right, view along the cube diagonal. The objects in (**b**) to (**d**) are not drawn to scale. (Structure images were drawn with Diamond [9] from the deposited cif file under CCDC-no./Refcode 256966/SAHYOQ [19,[[20]](#endnote-20)].)

### Section S4: Nitrogen adsorption isotherms and powder X-ray diffractograms (Figure S15, Figure S16, Figure S17, Figure S18)

(**a**)
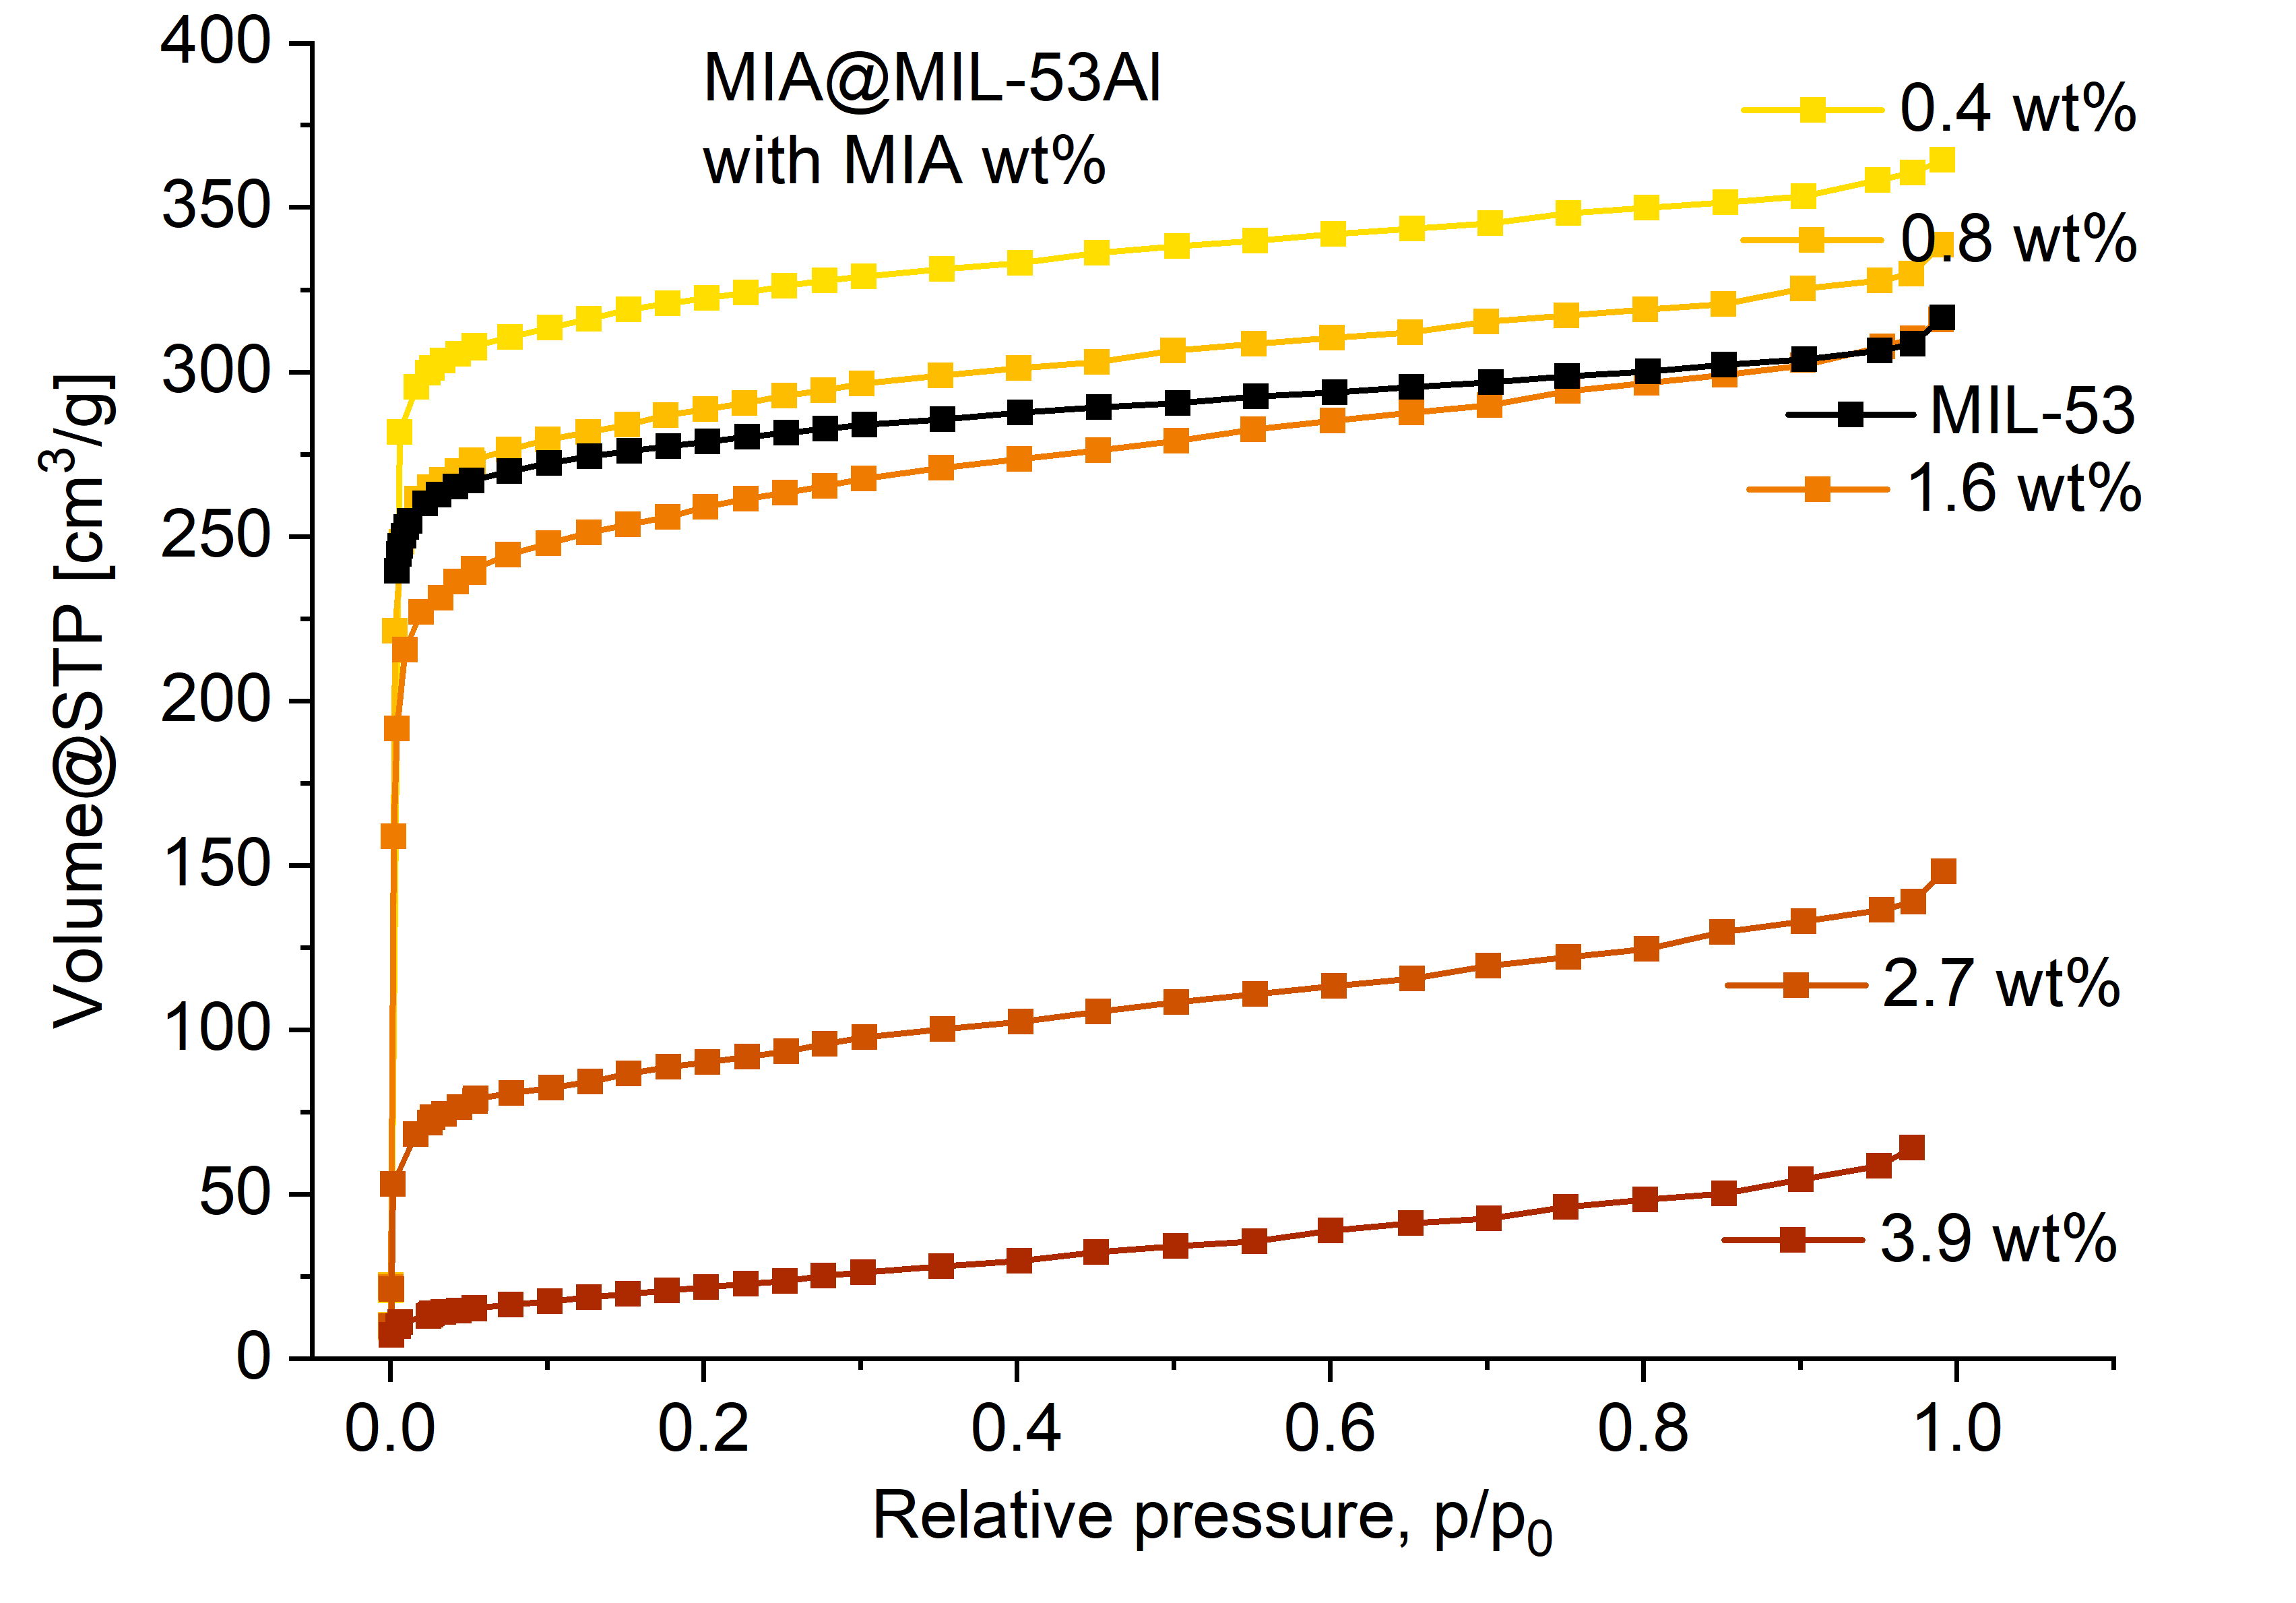
(**b**)
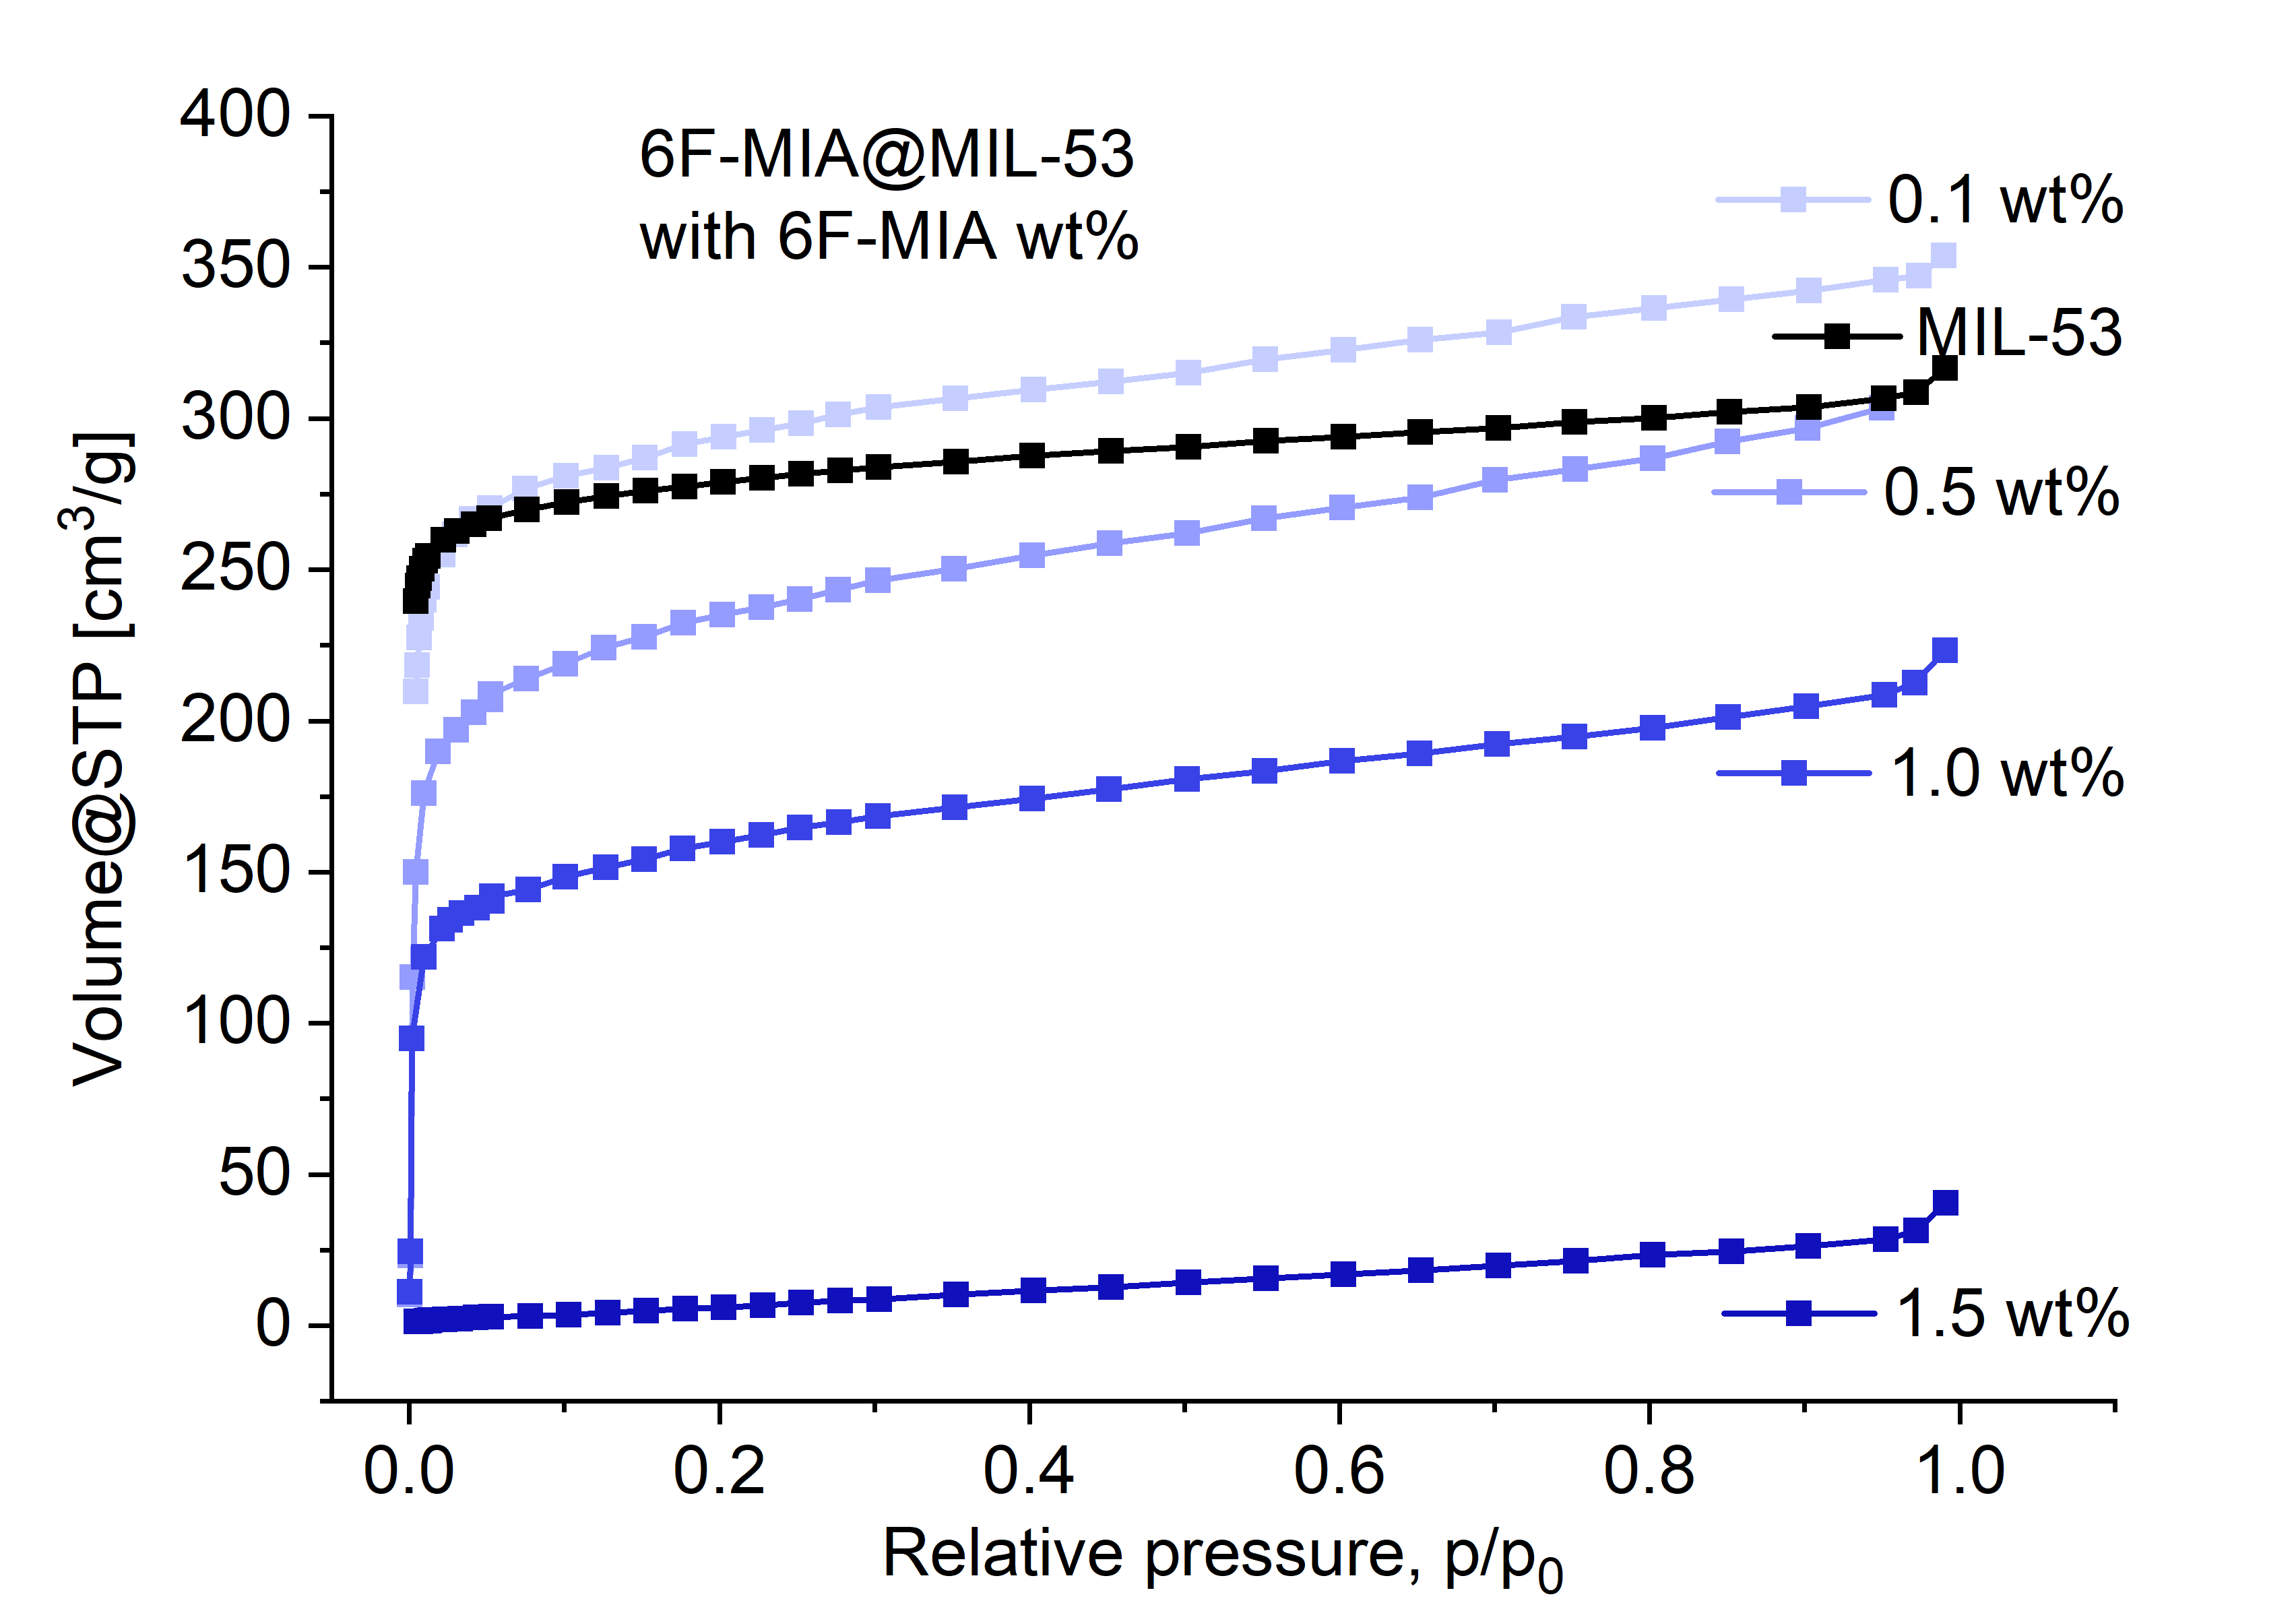


**Figure S15.** Nitrogen adsorption isotherms (77 K) of (**a**) MIA@MIL-53 and (**b**) 6F‑MIA@MIL-53 with different flavin amounts.

(**a**)
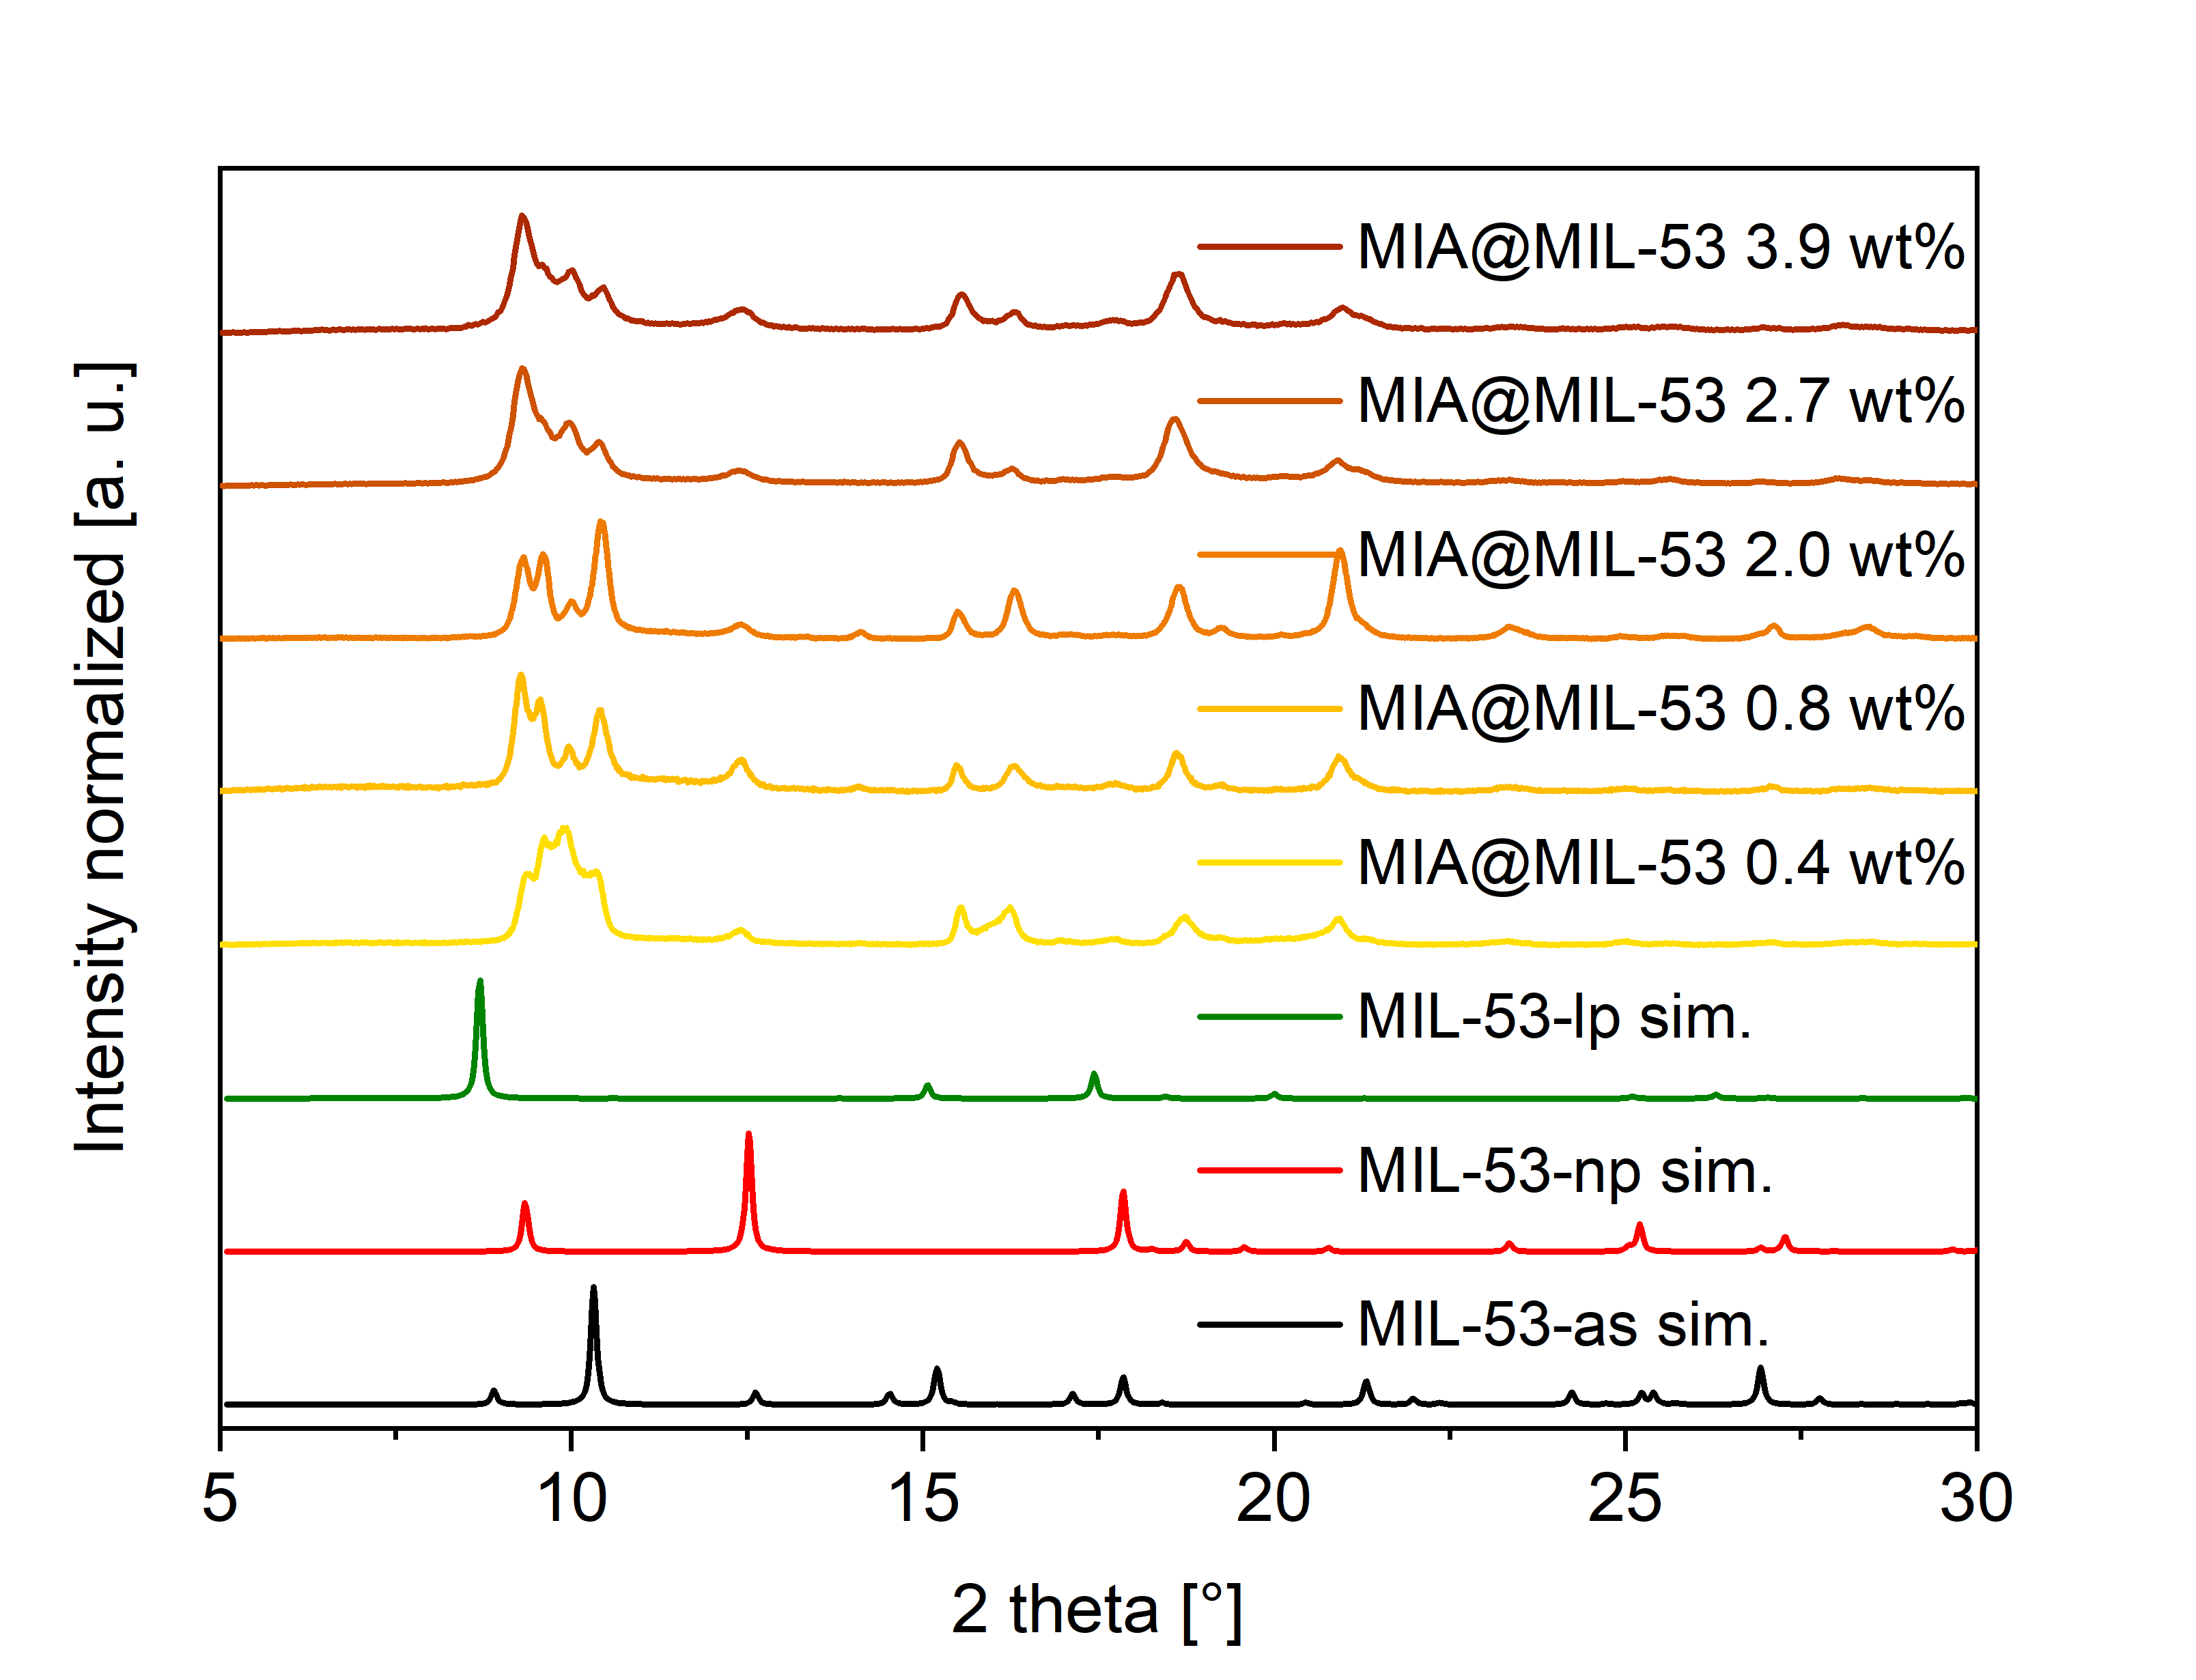


(**b**)
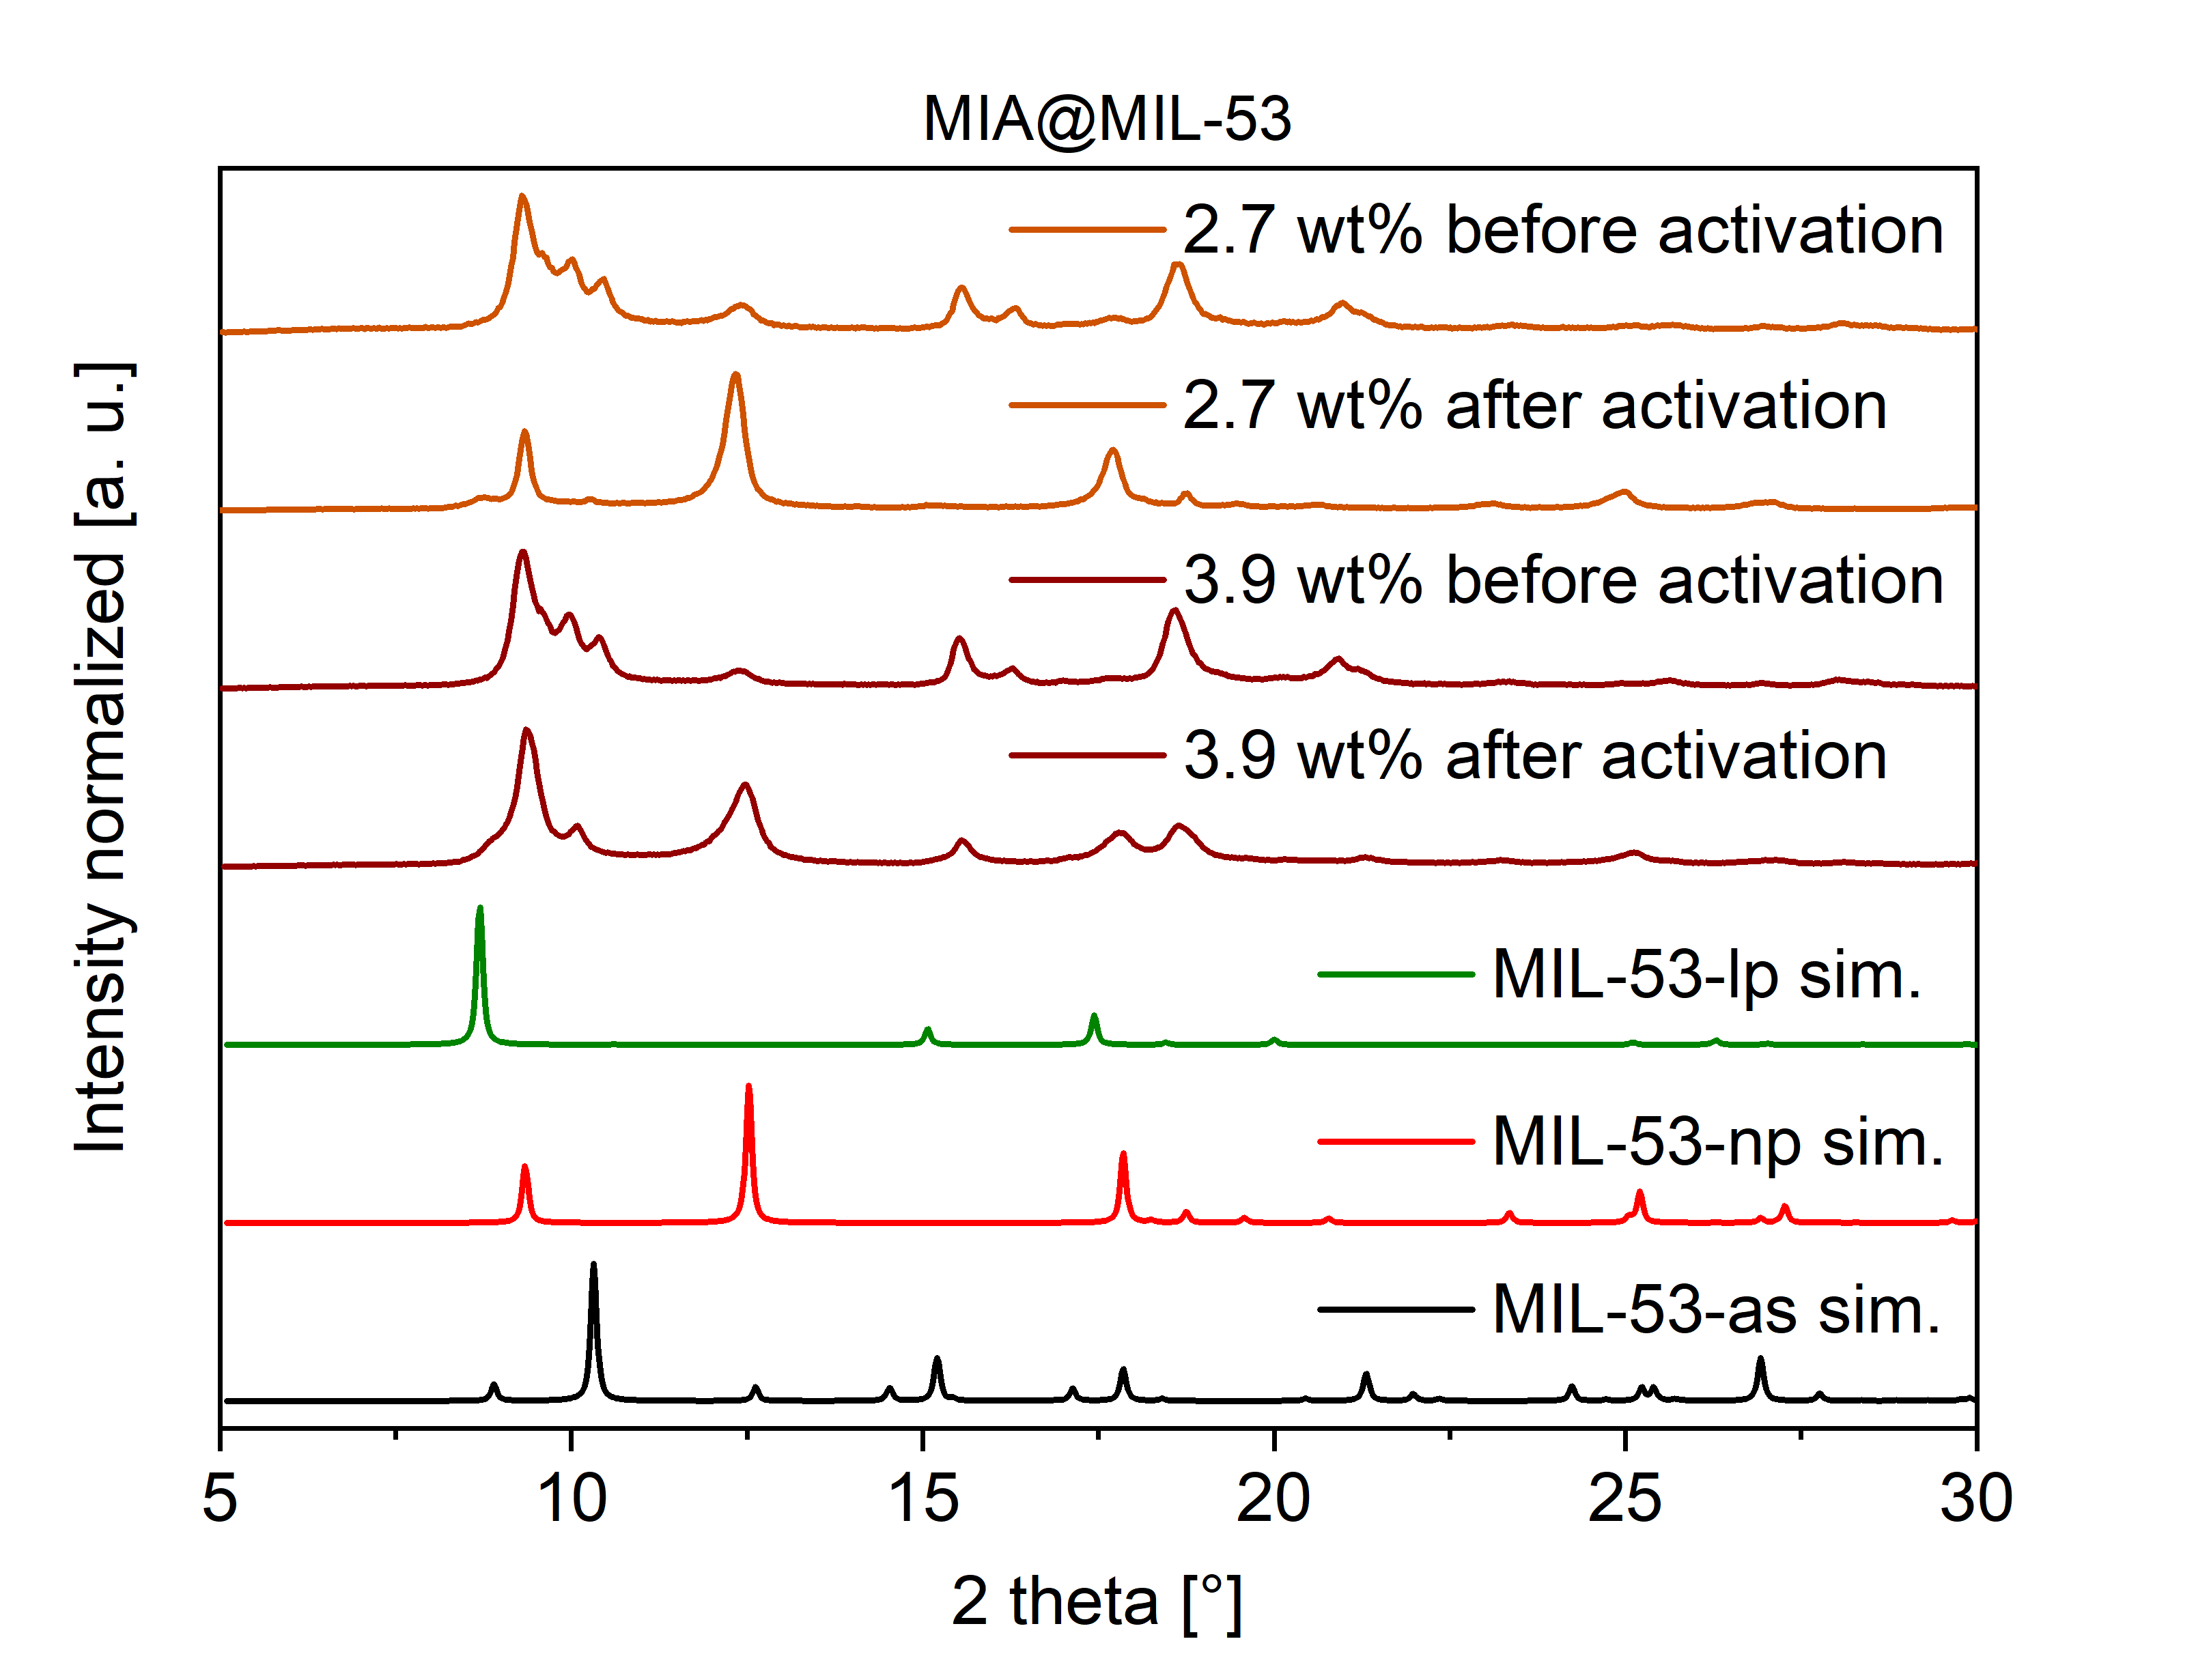


**Figure S16.** Comparison of the PXRD patterns of MIA@MIL-53 with varying flavin amounts (**a**) *before* activation and (**b**) *before and after* activation for 2.7 wt% and 3.9 wt% with the simulated PXRDs for MIL-53-as, -np and -lp based on the deposited cif files under CCDC-no./Refcode 220475/SABVOH for MIL-53-as, 220476/SABVUN for MIL-53-lp and 220477/ SABWAU for MIL-53-np [6].

The slight shift in the corresponding peak positions between the experimental and simulated diffractograms in Figure S16 is due to different cell constants from the formation of the experimental MIA@MIL-53 phases which only approximate the published MIL-53-as, -lp and -np phases. The simulated patterns from these published MIL-53-as, -lp and -np phases are based on Rietveld refinements of PXRDs from a specific sample treatment protocol [6], which understandably differs from our treatment of the composite samples. An X-ray thermodiffractogram of MIL-53-as in ref. [6] illustrates the peak shift in the diffractograms with temperature. Hence, the experimental diffractograms of flavin@MIL-53 reflect 'breathing' phases which can only approximate the literature phases obtained at different conditions. Yet, the peak pattern allows for an unequivocal phase assignment.

The transition from as-synthesized to large-pore form required high temperature (cf. Figure S12), due to the removal of residual terephthalic acid. When the terephthalic acid is already removed through the washing steps concomitant with the flavin insertion, then there is only volatile solvent remaining in the as-synthesized form. Subsequently, the transition from as-synthesized to large-pore and further to narrow-pore form can occur upon sample storage and preparation under ambient air conditions. The reflections indicate a phase mixture that additionally varies with the different amounts of flavin incorporated.

(**a**)
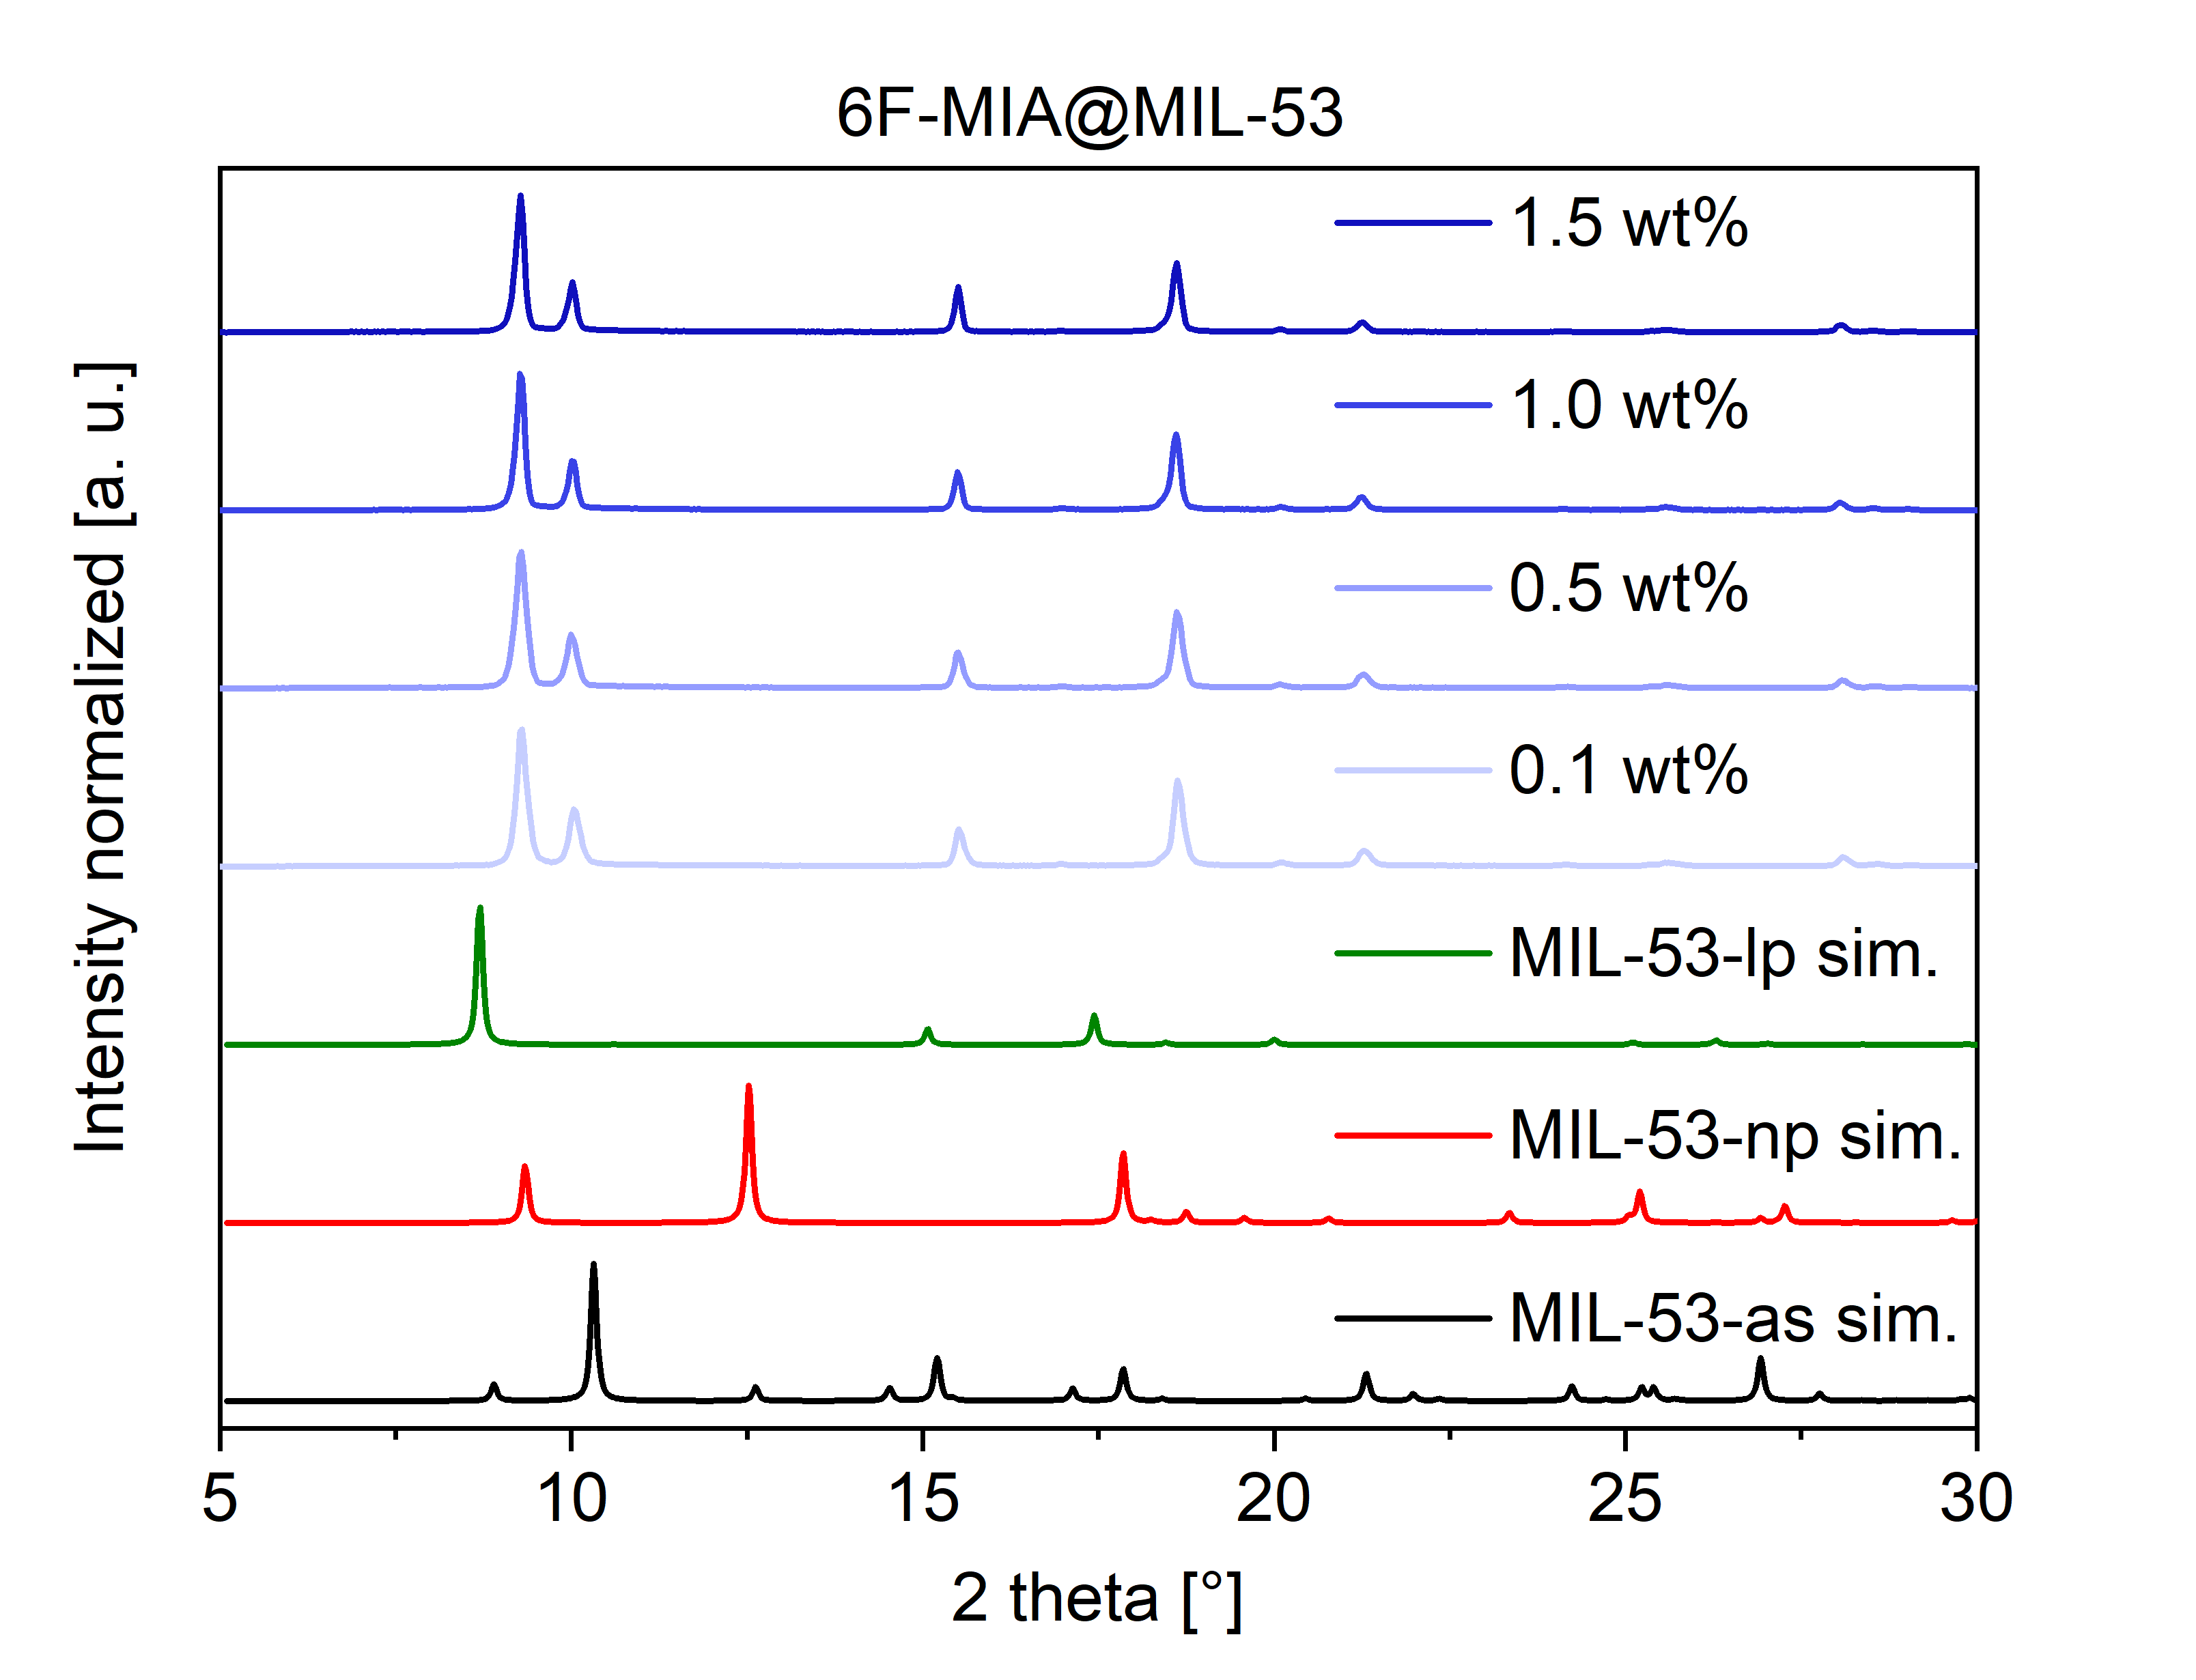


(**b**)
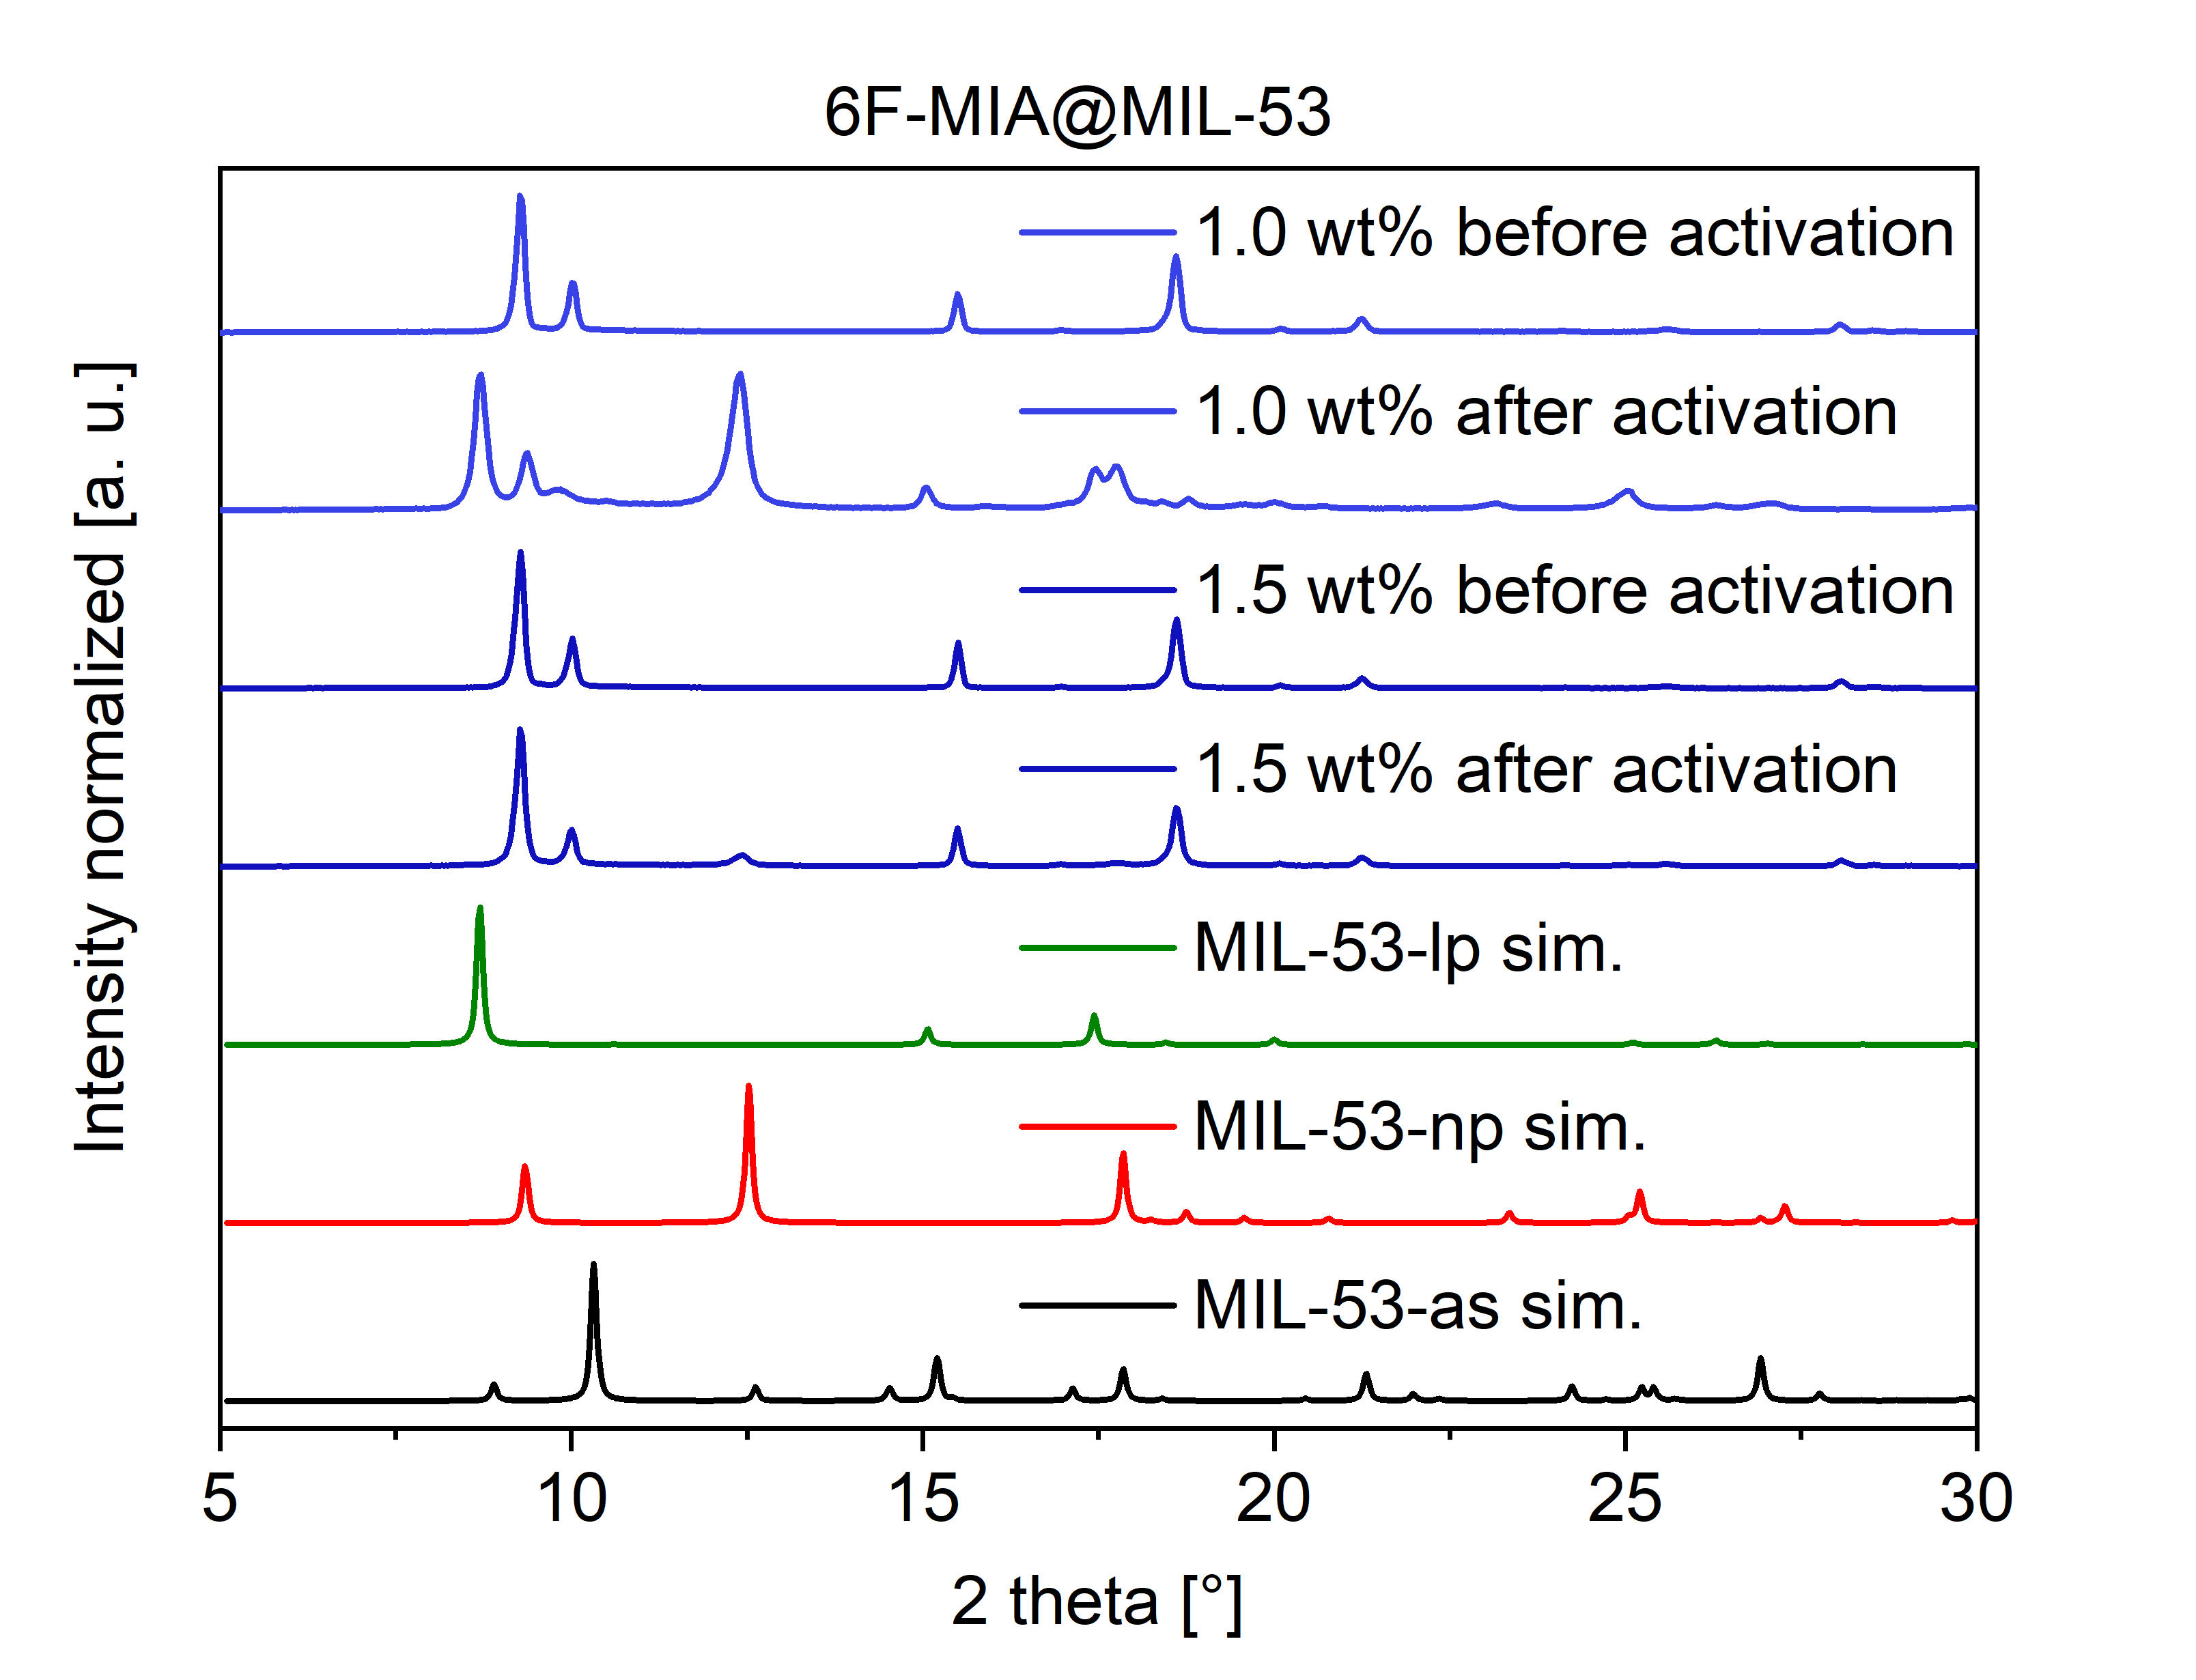


**Figure S17.** Comparison of the PXRD patterns of 6F-MIA@MIL-53 with varying flavin amounts (**a**) *before* activation and (**b**) *before and after* activation for 1.0 wt% and 1.5 wt%. The simulated PXRDs are based on the deposited cif files under CCDC-no./Refcode 220475/SABVOH for MIL-53-as, 220476/SABVUN for MIL-53-lp and 220477/ SABWAU for MIL-53-np [6].

(**a**)
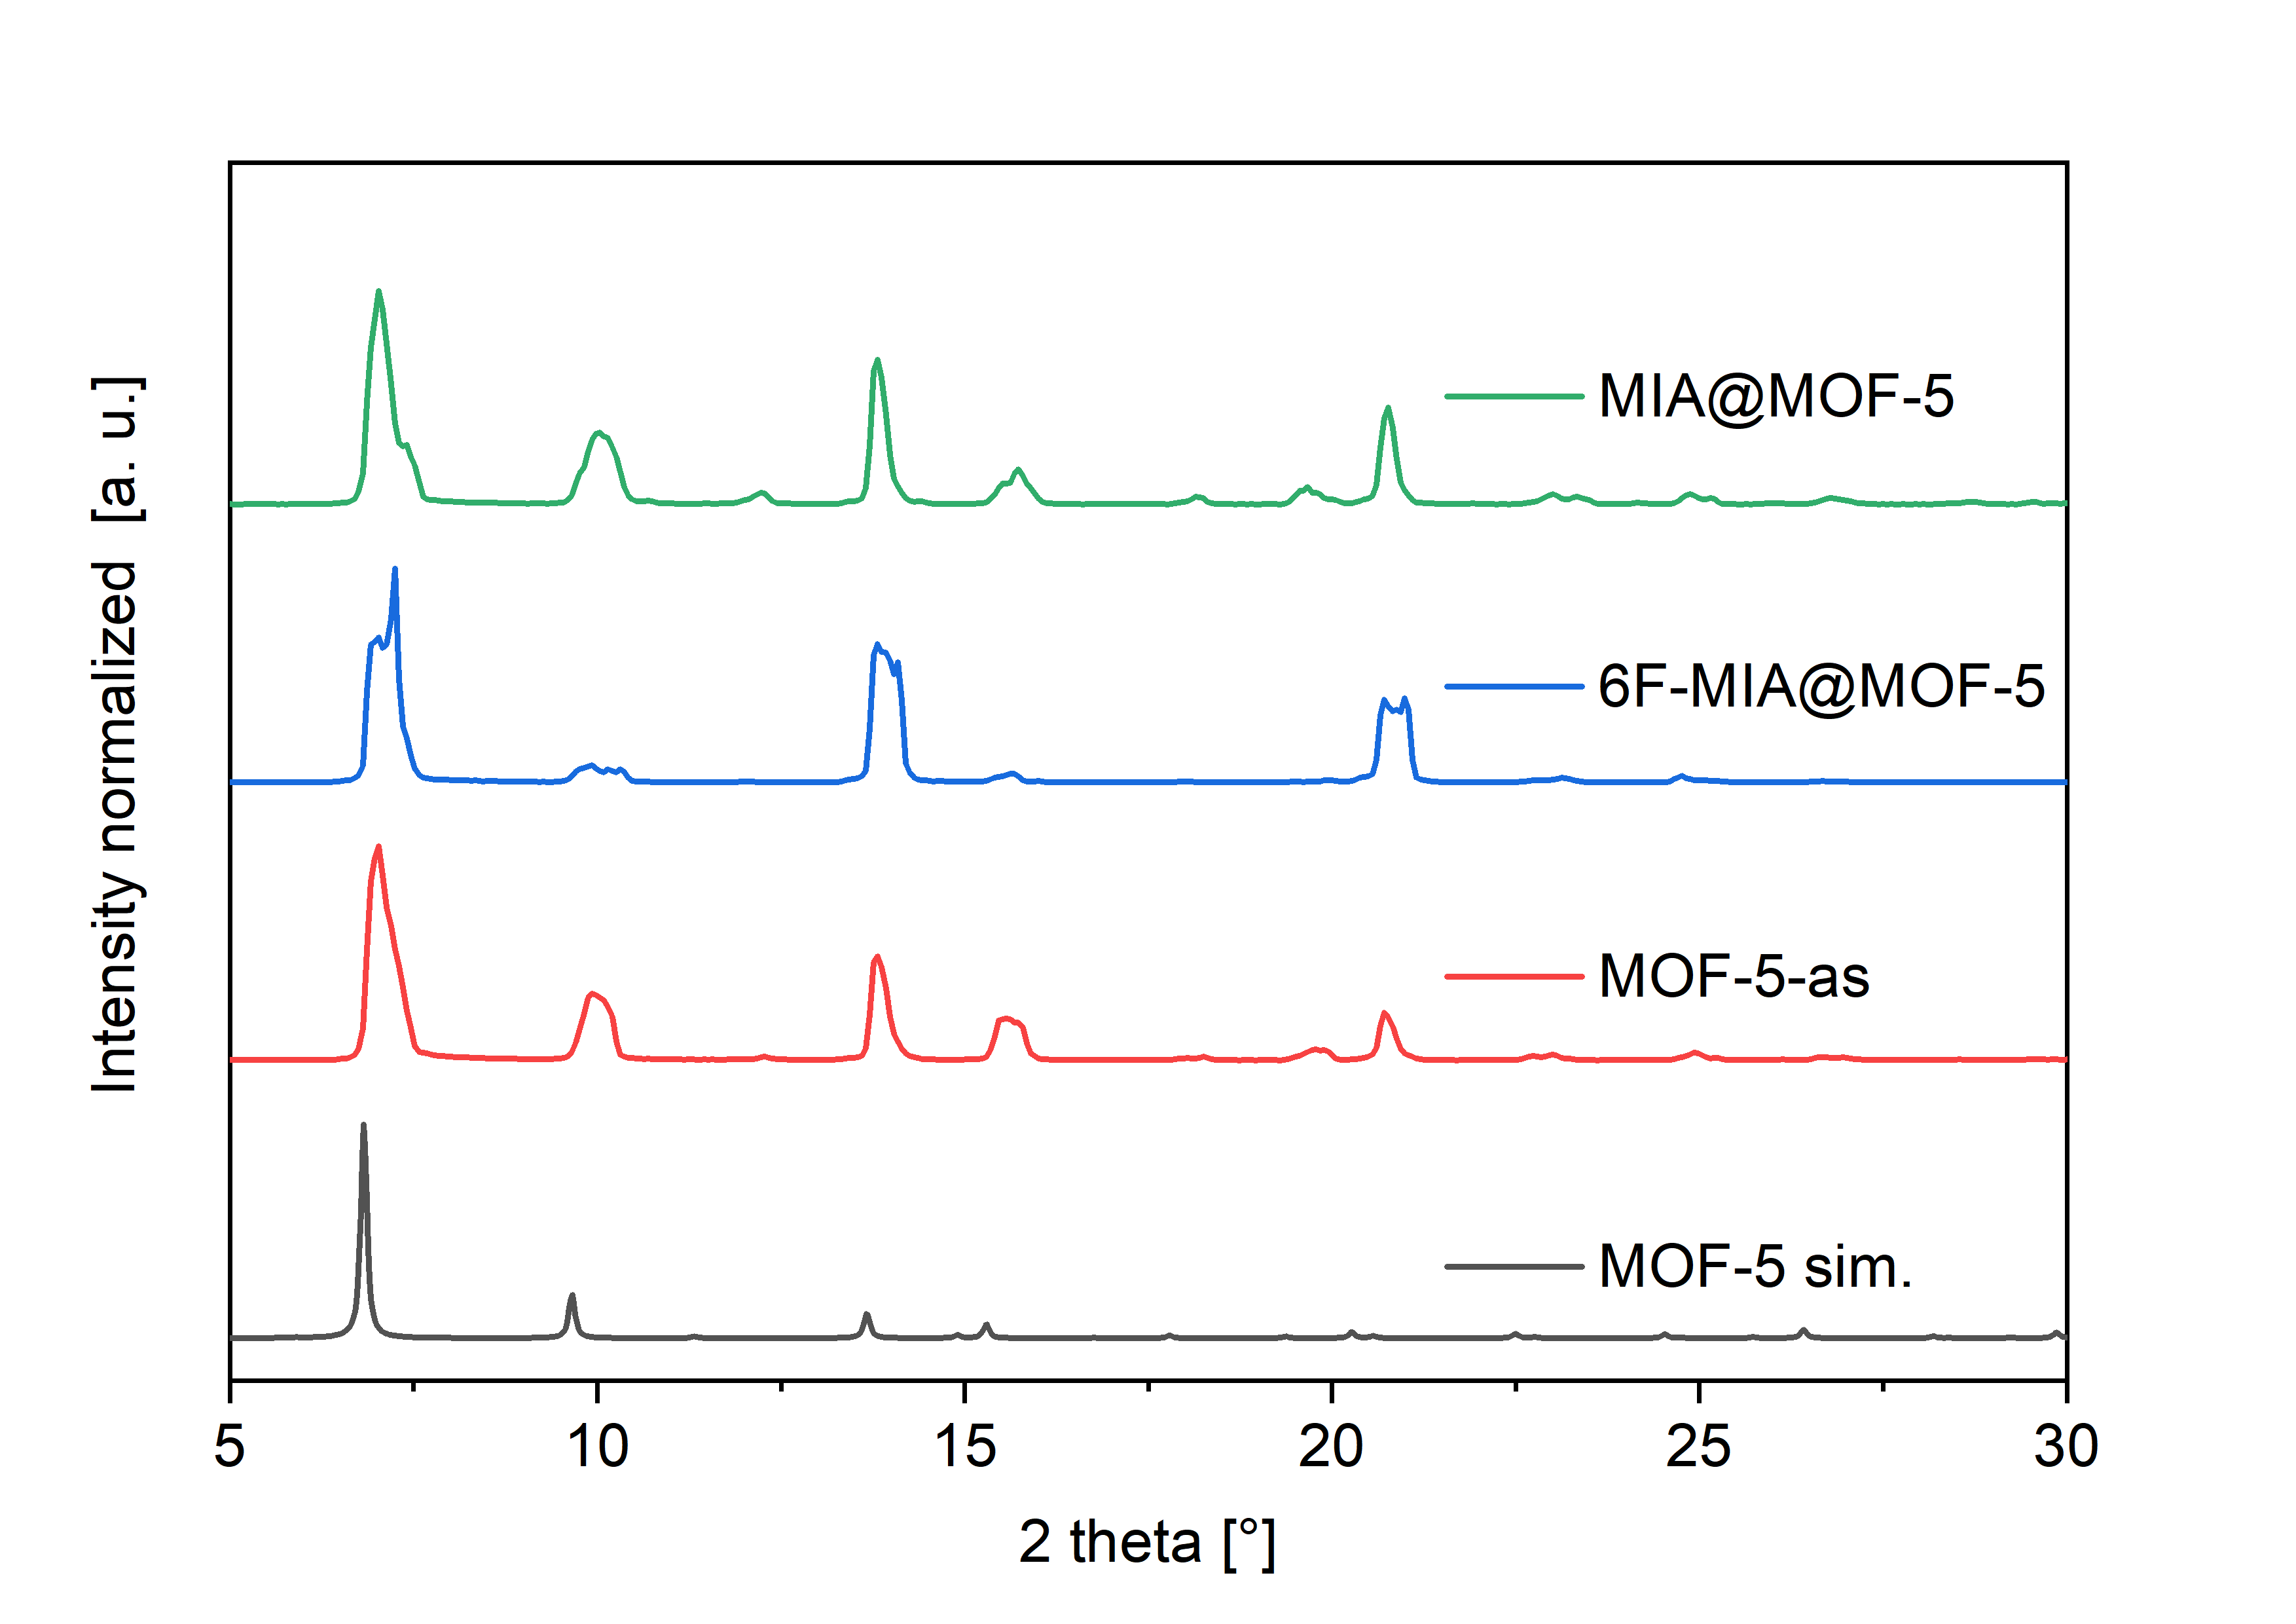


(**b**)

**Figure S18.** Comparison of the PXRD patterns of (**a**) MIA@MOF-5 and 6F-MIA@MOF-5 with simulated MOF-5; (**b**) MIA@MOF-5 with the measured patterns of zinc nitrate hexahydrate and simulated terephthalic acid and MOF-5. (Note the different 2theta range in (a) and (b). The simulated PXRDs are based on the deposited cif files under CCDC-no./Refcode 1269122/TEPHTH for terephthalic acid [[[21]](#endnote-21)] and CCDC-no./Refcode 256966/SAHYOQ for MOF-5 [20,[[22]](#endnote-22)].

### Section S5: Photophysical characterization of the dyes and dye@MOF (Figure S19 - Figure S34)

**Figure S19.** Photoluminescence spectra of MIA (left) and 6F-MIA (right) (*λ*exc = 440 nm) at room temperature, RT, (black) and in a frozen 1:1 DCM/MeOH glassy matrix at 77 K (red).

**Figure S20.** Photoluminescence spectra of MIA@MIL53Al with 0.4 wt % loading (left) and 3.9 wt % loading (right) (*λ*exc = 440 nm) at room temperature, RT, (black) and in a frozen 1:1 DCM/MeOH glassy matrix at 77 K (red).

**Figure S21.** Photoluminescence spectra of 6F-MIA@MIL53Al with 0.1 wt % loading (left) and 1.5 wt % loading (right) (*λ*exc = 440 nm) at room temperature, RT, (black) and in a frozen 1:1 DCM/MeOH glassy matrix at 77 K (red).

**Figure S22.** Photoluminescence spectra of MIA@MOF-5 (left) and 6F-MIA@MOF-5 (right) (*λ*exc = 440 nm) at room temperature, RT, (black) and in a frozen 1:1 DCM/MeOH glassy matrix at 77 K (red).


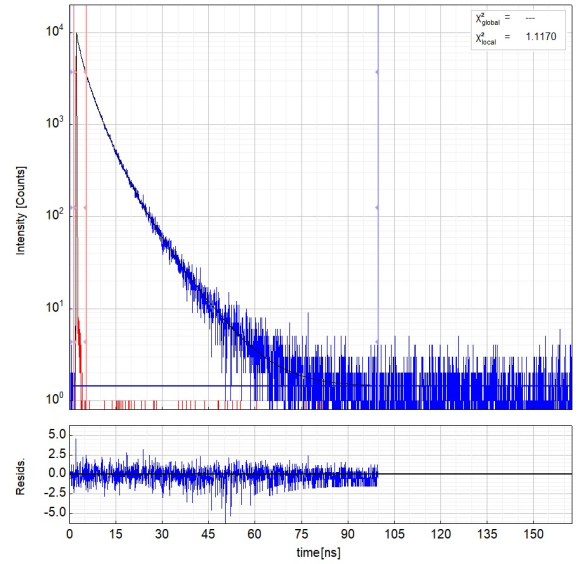

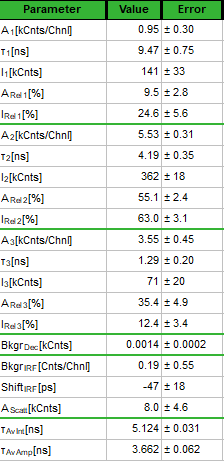


**Figure S23.** Left: Raw time-resolved photoluminescence decay (blue) of MIA@MOF-5 in solid state at 298 K and the instrument response function (red), including the residuals (ex = 405 nm, em = 530 nm). Right: Fitting parameters including pre-exponential factors and confidence limits. Here, **av_int is the intensity-weighted average lifetime (τF) and **av_ampis amplitude-weighted average lifetime (τx).


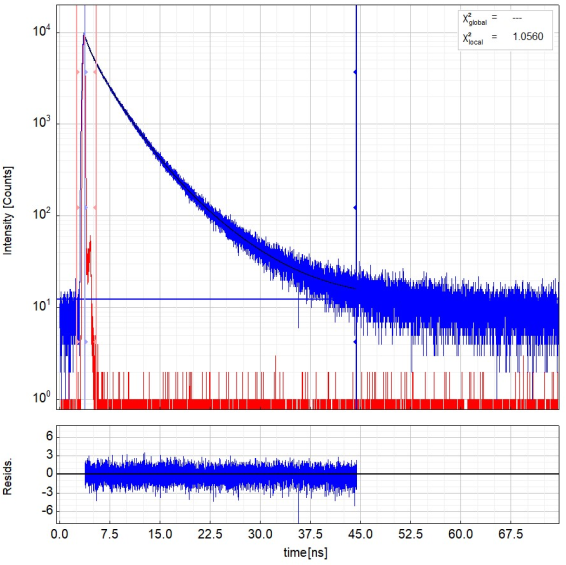

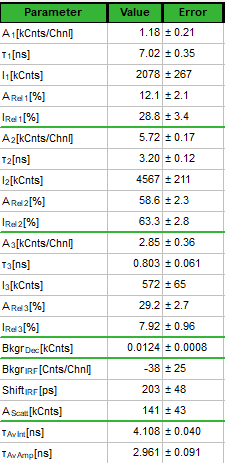


**Figure S24.** Left: Raw time-resolved photoluminescence decay (blue) of 6F-MIA@MOF-5 in solid state at 298 K and the instrument response function (red), including the residuals (ex = 405 nm, em = 510 nm). Right: Fitting parameters including pre-exponential factors and confidence limits. Here, **av_int is the intensity-weighted average lifetime (τF) and **av_ampis amplitude-weighted average lifetime (τx).


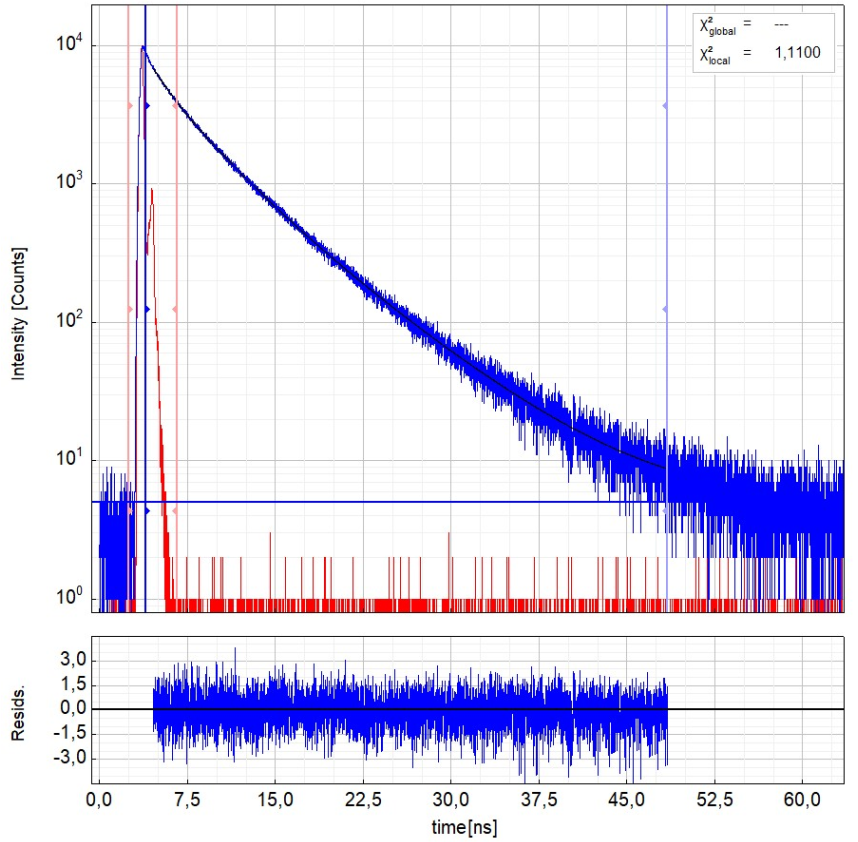

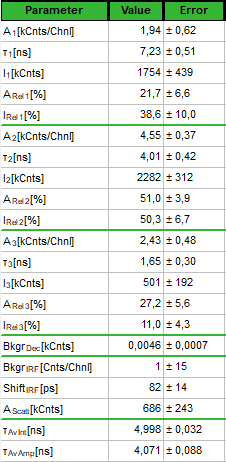


**Figure S25.** Left: Raw time-resolved photoluminescence decay (blue) of 0.4 wt% MIA@MIL-53AI in solid state at 298 K and the instrument response function (red), including the residuals (ex = 405 nm, em = 520 nm). Right: Fitting parameters including pre-exponential factors and confidence limits. Here, **av_int is the intensity-weighted average lifetime (τF) and **av_ampis amplitude-weighted average lifetime (τx).


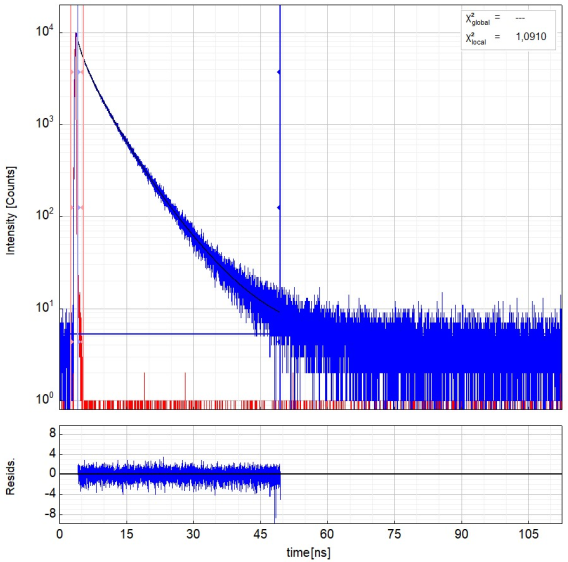

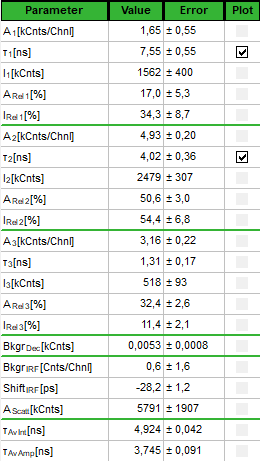


**Figure S26.** Left: Raw time-resolved photoluminescence decay (blue) of 3.9 wt% MIA@MIL-53AI in solid state at 298 K and the instrument response function (red), including the residuals (ex = 405 nm, em = 525 nm). Right: Fitting parameters including pre-exponential factors and confidence limits. Here, **av_int is the intensity-weighted average lifetime (τF) and **av_ampis amplitude-weighted average lifetime (τx).


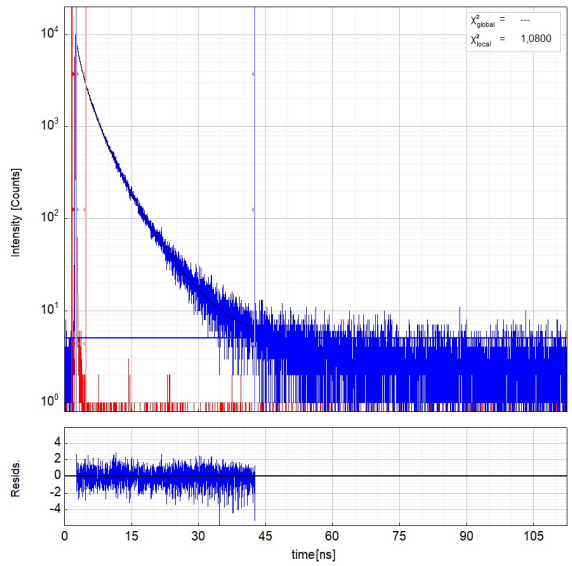

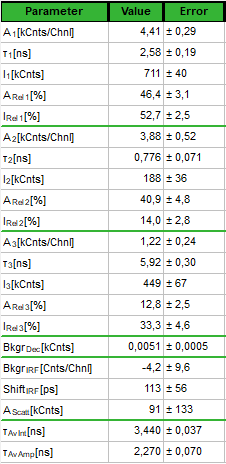


**Figure S27.** Left: Raw time-resolved photoluminescence decay (blue) of 0.1 wt% 6F-MIA@MIL-53AI in solid state at 298 K and the instrument response function (red), including the residuals (ex = 405 nm, em = 535 nm). Right: Fitting parameters including pre-exponential factors and confidence limits. Here, **av_int is the intensity-weighted average lifetime (τF) and **av_ampis amplitude-weighted average lifetime (τx).


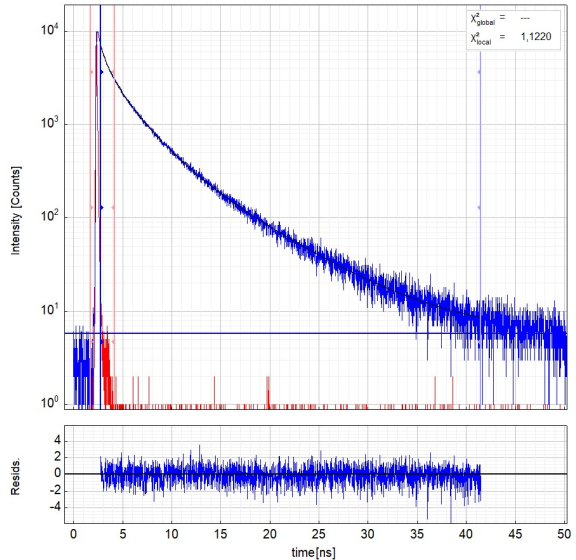

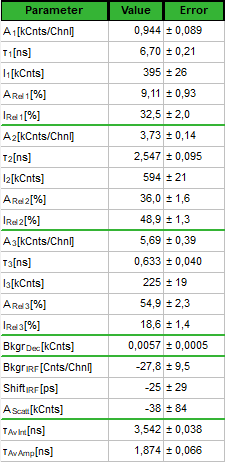


**Figure S28.** Left: Raw time-resolved photoluminescence decay (blue) of 1.5 wt% 6F-MIA@MIL-53AI in solid state at 298 K and the instrument response function (red), including the residuals (ex = 405 nm, em = 535 nm). Right: Fitting parameters including pre-exponential factors and confidence limits. Here, **av_int is the intensity-weighted average lifetime (τF) and **av_ampis amplitude-weighted average lifetime (τx).


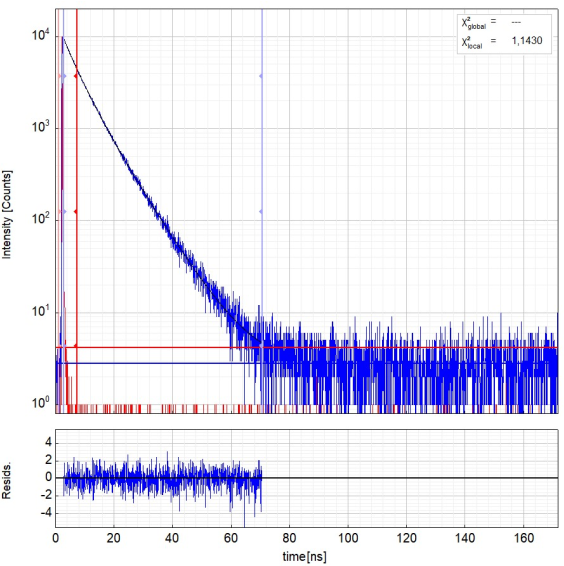

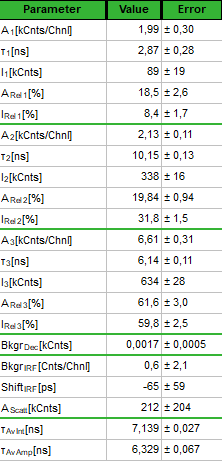


**Figure S29.** Left: Raw time-resolved photoluminescence decay (blue) of MIA in a DCM/MeOH solution at 298 K and the instrument response function (red), including the residuals (ex = 405 nm, em = 525 nm). Right: Fitting parameters including pre-exponential factors and confidence limits. Here, **av_int is the intensity-weighted average lifetime (τF) and **av_ampis amplitude-weighted average lifetime (τx).


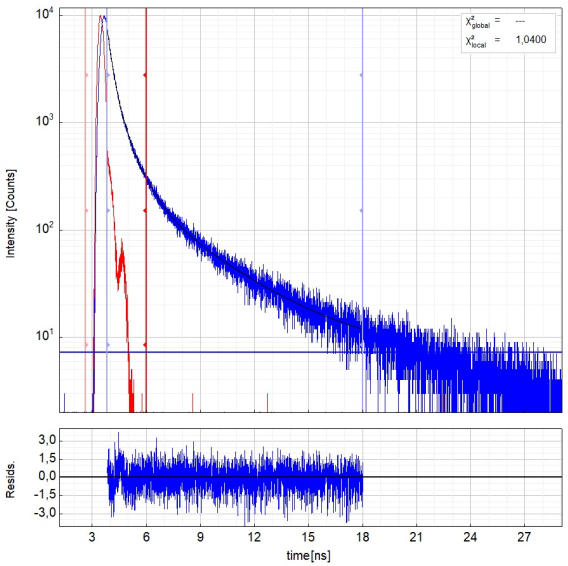

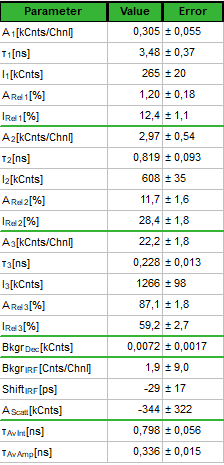


**Figure S30.** Left: Raw time-resolved photoluminescence decay (blue) of MIA in solid state at 298 K and the instrument response function (red), including the residuals (ex = 405 nm, em = 550 nm). Right: Fitting parameters including pre-exponential factors and confidence limits. Here, **av_int is the intensity-weighted average lifetime (τF) and **av_ampis amplitude-weighted average lifetime (τx).


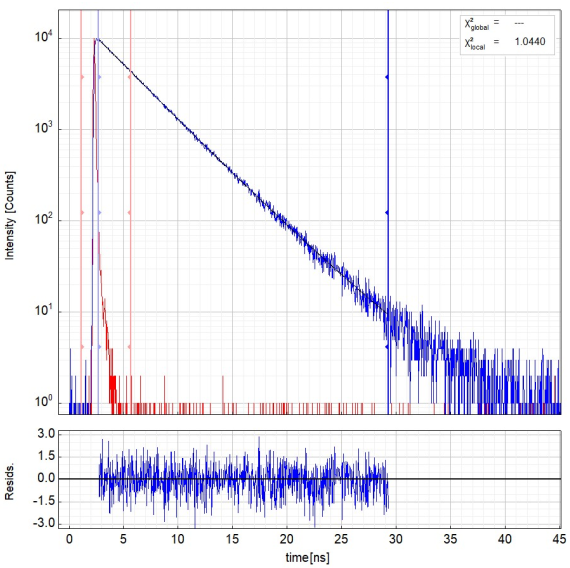

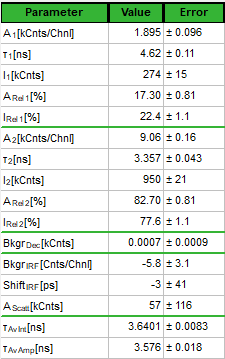


**Figure S31.** Left: Raw time-resolved photoluminescence decay (blue) of 6F-MIA in a DCM/MeOH solution at 298 K and the instrument response function (red), including the residuals (ex = 405 nm, em = 525 nm). Right: Fitting parameters including pre-exponential factors and confidence limits. Here, **av_int is the intensity-weighted average lifetime (τF) and **av_ampis amplitude-weighted average lifetime (τx).


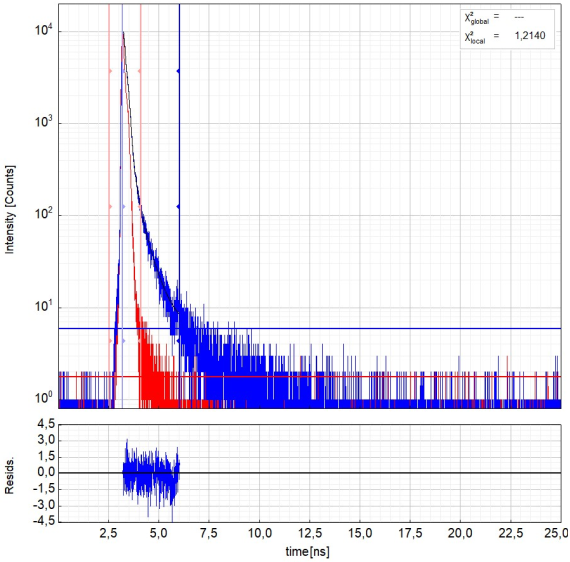

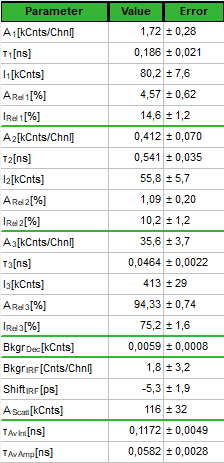


**Figure S32.** Left: Raw time-resolved photoluminescence decay (blue) of 6F-MIA in solid state at 298 K and the instrument response function (red), including the residuals (ex = 405 nm, em = 550 nm). Right: Fitting parameters including pre-exponential factors and confidence limits. Here, **av_int is the intensity-weighted average lifetime (τF) and **av_ampis amplitude-weighted average lifetime (τx).

**Figure S33.** Time-correlated polarization-resolved single-photon data of the flavin@MOF composites imaged by confocal multi-parameter fluorescence image spectroscopy (MFIS) with pulsed excitation at 440 nm and λem = 502-538 nm (Figure 6, main document). Global fits by iterative reconvolution of the instrumental function (grey curves) to p- and s-polarized decays required 4 fluorescence lifetime components (lifetimes and species fractions are compiled in Table 3 of the main document) and one (two for MIA@MIL-53) rotational correlation time. The offsets in the decays are caused by afterpulsing of the detectors and taken into account by the fitting routine. The *G*-factor, compensating differences in the detection efficiencies in the two polarization channels, of *G* = 0.97 was determined by fitting polarized fluorescence decays of an aqueous solution of Rhodamine 110. For flavin@MOF-5 five slices in the center of the z-stack were selected to generate the decay histograms, for flavin@MIL53 all photons from the images were used.


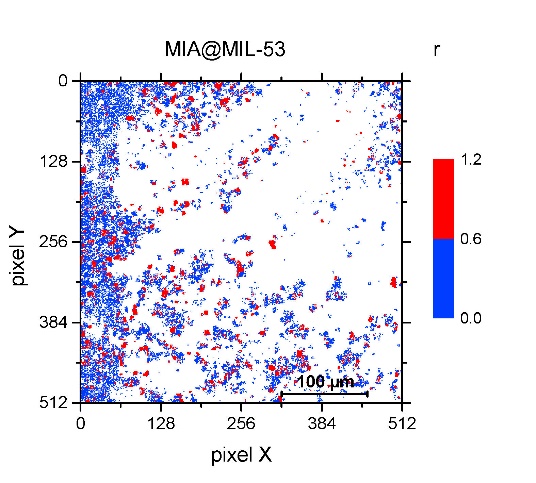

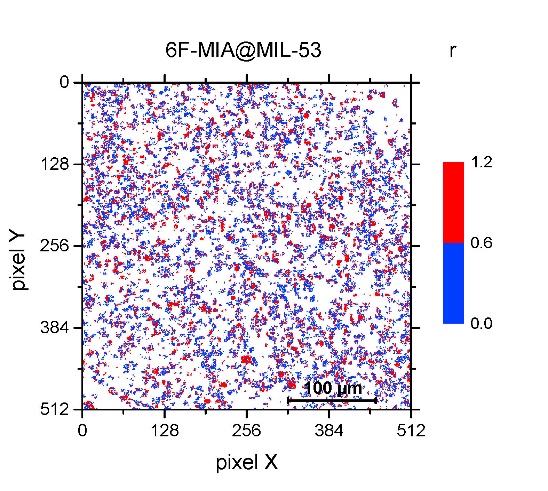


**Figure S34.** MFIS images of flavin@MIL-53 displaying experimental steady state fluorescence anisotropy *r* of Figure 6 with a distinct color scheme to highlight that one microcrystal has a unique anisotropy, i.e. *r* is a unique feature for each crystal that is related to its orientation. For further information, see discussion of Figure 6 in the main text section 2.3.

### Section S6: Theoretical calculations (Figure S35 - Figure S41)

Force Field parameters are in the AMBER20 format and units.

### Section S6.1: Force Field MIA

*Atom number FF atom type*


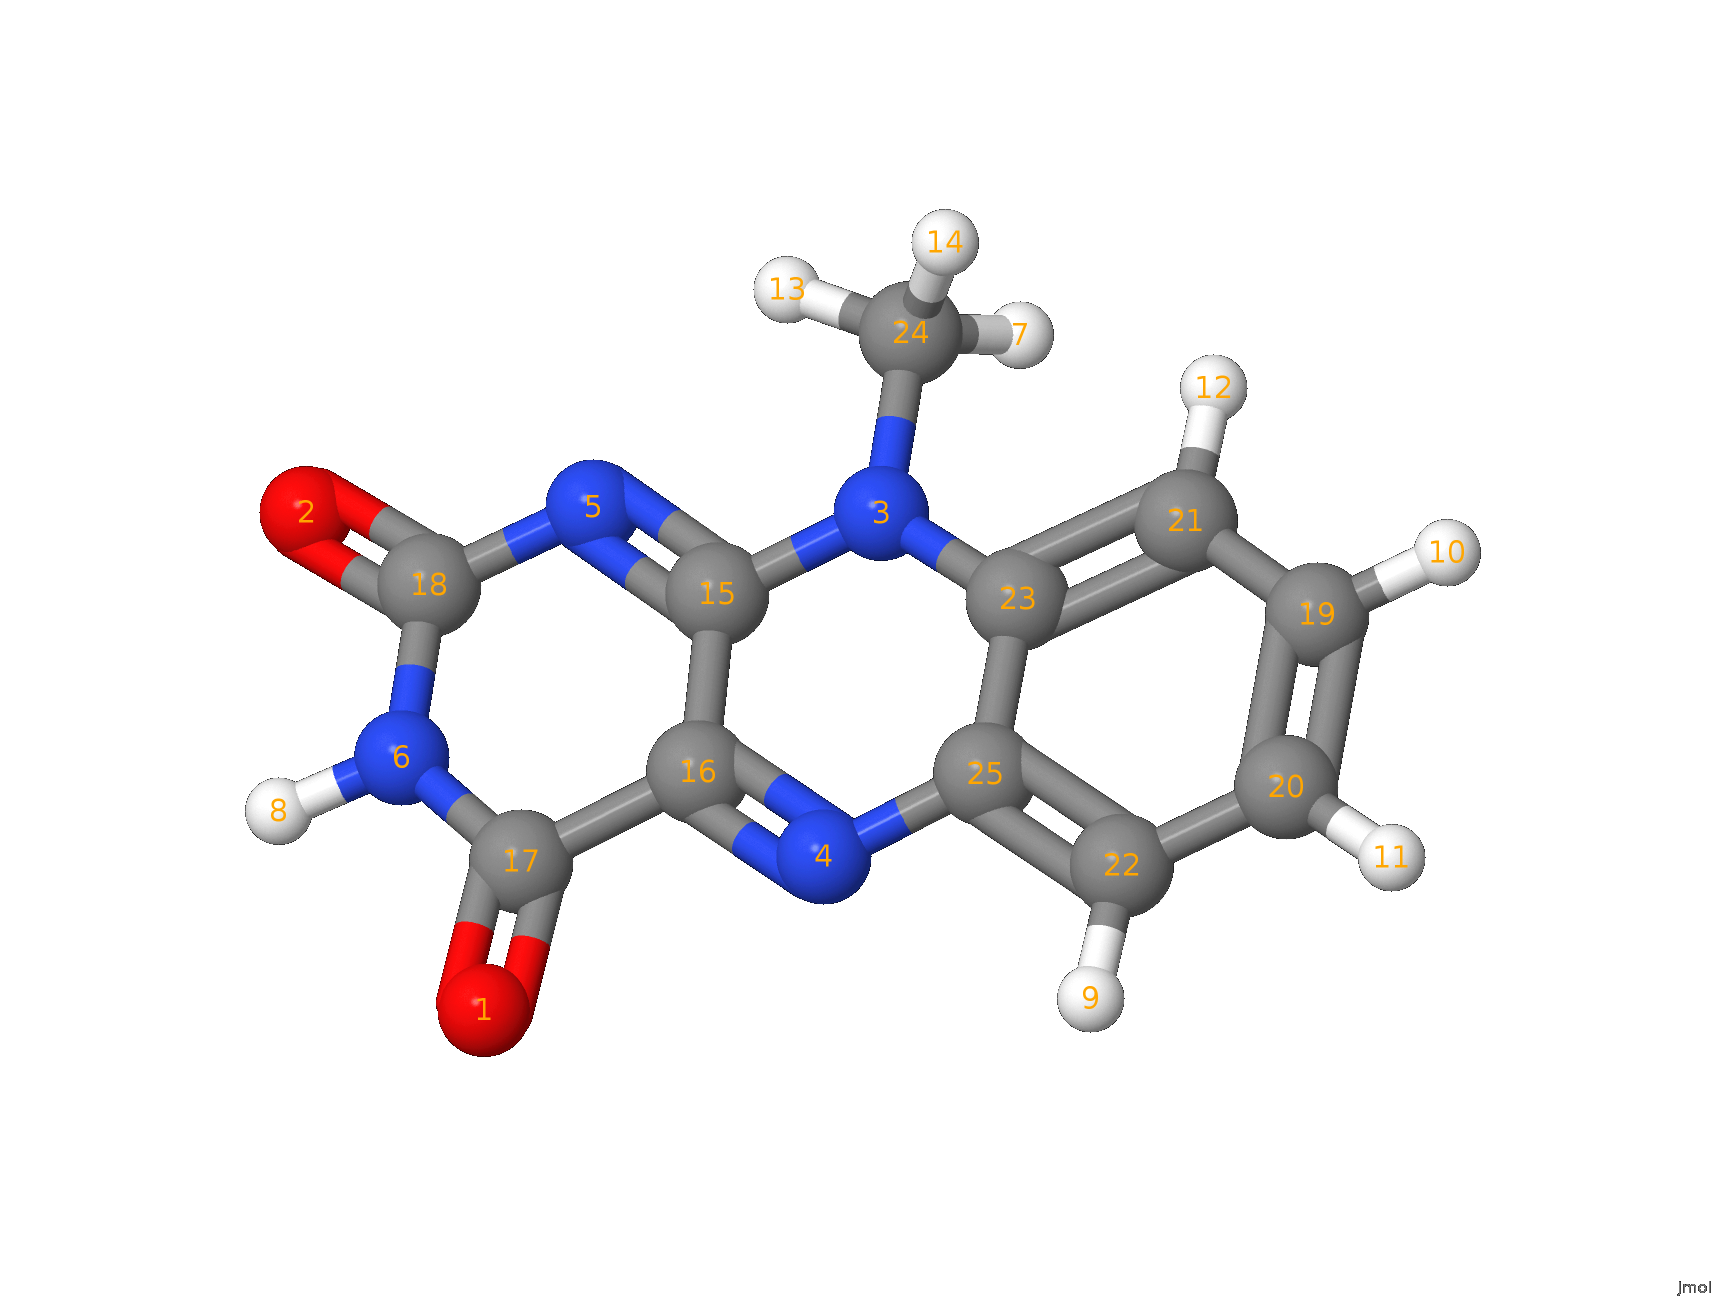
O 1 Oc

O 2 Oc

N 3 Na

N 4 Nc

N 5 Nc

N 6 N

H 7 H1

H 8 Hn

H 9 Hm

H 10 Hm

H 11 Hm

H 12 Hm

H 13 H1

H 14 H1

C 15 Cd

C 16 Cd

C 17 Co

C 18 Co

C 19 Cm

C 20 Cm

C 21 Cm

C 22 Cm

C 23 Cm

C 24 C3

C 25 Cm

**MASS**

om 16.000 0.434

n 14.010 0.530

nc 14.010 0.530

na 14.010 0.530

hn 1.008 0.161

h1 1.008 0.135

hm 1.008 0.135

c2 12.010 0.616

cd 12.010 0.360

c3 12.010 0.878

cm 12.010 0.360

**BOND STRETCHING**

om-c2 637.70 1.218

n -hn 403.20 1.013

n -c2 427.60 1.379

nc-c2 416.90 1.387

nc-cd 525.40 1.317

nc-cm 467.70 1.352

na-cd 425.80 1.380

na-c3 327.70 1.463

na-cm 420.50 1.384

h1-c3 330.60 1.097

hm-cm 345.80 1.086

c2-cd 371.00 1.468

cd-cd 419.80 1.428

cm-cm 461.10 1.398

**ANGLE BENDING**

om-c2-n 74.220 123.050

om-c2-nc 73.910 123.180

om-c2-cd 69.140 123.930

n -c2-nc 71.580 117.110

n -c2-cd 69.070 112.700

nc-cd-na 74.900 112.220

nc-cd-cd 71.570 112.560

nc-cd-c2 67.620 121.880

nc-cm-cm 69.460 119.720

na-cd-cd 68.580 117.770

na-c3-h1 49.830 108.780

na-cm-cm 69.080 118.340

hn-n -c2 48.330 117.550

h1-c3-h1 39.240 108.460

hm-cm-cm 48.180 119.880

c2-n -c2 63.740 127.080

c2-nc-cd 66.680 120.490

c2-cd-cd 63.620 122.690

cd-nc-cm 72.480 104.880

cd-na-c3 61.880 126.460

cd-na-cm 67.400 113.150

c3-na-cm 62.320 124.360

cm-cm-cm 66.620 120.020

**TORSION**

om-c2-n -hn 1 2.500 180.000 -2.000

om-c2-n -hn 1 2.000 0.000 1.000

om-c2-n -c2 1 2.500 180.000 2.000

om-c2-nc-cd 1 4.000 180.000 2.000

om-c2-cd-nc 1 2.875 180.000 2.000

om-c2-cd-cd 1 2.875 180.000 2.000

n -c2-nc-cd 1 4.000 180.000 2.000

n -c2-cd-nc 1 2.875 180.000 2.000

n -c2-cd-cd 1 2.875 180.000 2.000

nc-c2-n -hn 1 2.500 180.000 2.000

nc-c2-n -c2 1 2.500 180.000 2.000

nc-cd-na-c3 1 1.700 180.000 2.000

nc-cd-na-cm 1 1.700 180.000 2.000

nc-cd-cd-nc 1 4.000 180.000 2.000

nc-cd-cd-c2 1 4.000 180.000 2.000

nc-cd-cd-na 1 4.000 180.000 2.000

nc-cm-cm-na 1 3.625 180.000 2.000

nc-cm-cm-cm 1 3.625 180.000 2.000

nc-cm-cm-hm 1 3.625 180.000 2.000

na-cd-nc-c2 1 4.750 180.000 2.000

na-cd-cd-c2 1 4.000 180.000 2.000

na-cm-cm-cm 1 3.625 180.000 2.000

na-cm-cm-hm 1 3.625 180.000 2.000

hn-n -c2-cd 1 2.500 180.000 2.000

h1-c3-na-cd 1 0.000 0.000 2.000

h1-c3-na-cm 1 0.000 0.000 2.000

hm-cm-cm-cm 1 3.625 180.000 2.000

hm-cm-cm-hm 1 3.625 180.000 2.000

c2-n -c2-cd 1 2.500 180.000 2.000

c2-nc-cd-cd 1 4.750 180.000 2.000

c2-cd-nc-cm 1 4.750 180.000 2.000

cd-nc-cm-cm 1 4.800 180.000 2.000

cd-cd-na-c3 1 1.700 180.000 2.000

cd-cd-na-cm 1 1.700 180.000 2.000

cd-na-cm-cm 1 0.300 180.000 2.000

cd-cd-nc-cm 1 4.750 180.000 2.000

c3-na-cm-cm 1 0.300 180.000 2.000

cm-cm-cm-cm 1 3.625 180.000 2.000

**OUT-OF-PLANE**

c2-c2-n -hn 1.1 180.0 2.0

c3-cm-na-cd 1.1 180.0 2.0

n -nc-c2-om 10.5 180.0 2.0

cd-n -c2-om 10.5 180.0 2.0

c2-cd-cd-nc 1.1 180.0 2.0

cd-na-cd-nc 1.1 180.0 2.0

cm-cm-cm-nc 1.1 180.0 2.0

cm-cm-cm-na 1.1 180.0 2.0

cm-cm-cm-hm 1.1 180.0 2.0

**NON-BONDED**

om 1.6612 0.2100

n 1.8240 0.1700

nc 1.8240 0.1700

na 1.8240 0.1700

hn 0.6000 0.0157

h1 1.3870 0.0157

hm 1.4590 0.0150

c2 1.9080 0.0860

cd 1.9080 0.0860

c3 1.9080 0.1094

cm 1.9080 0.0860

### Section S6.2: Force Field MIL-53(Al)
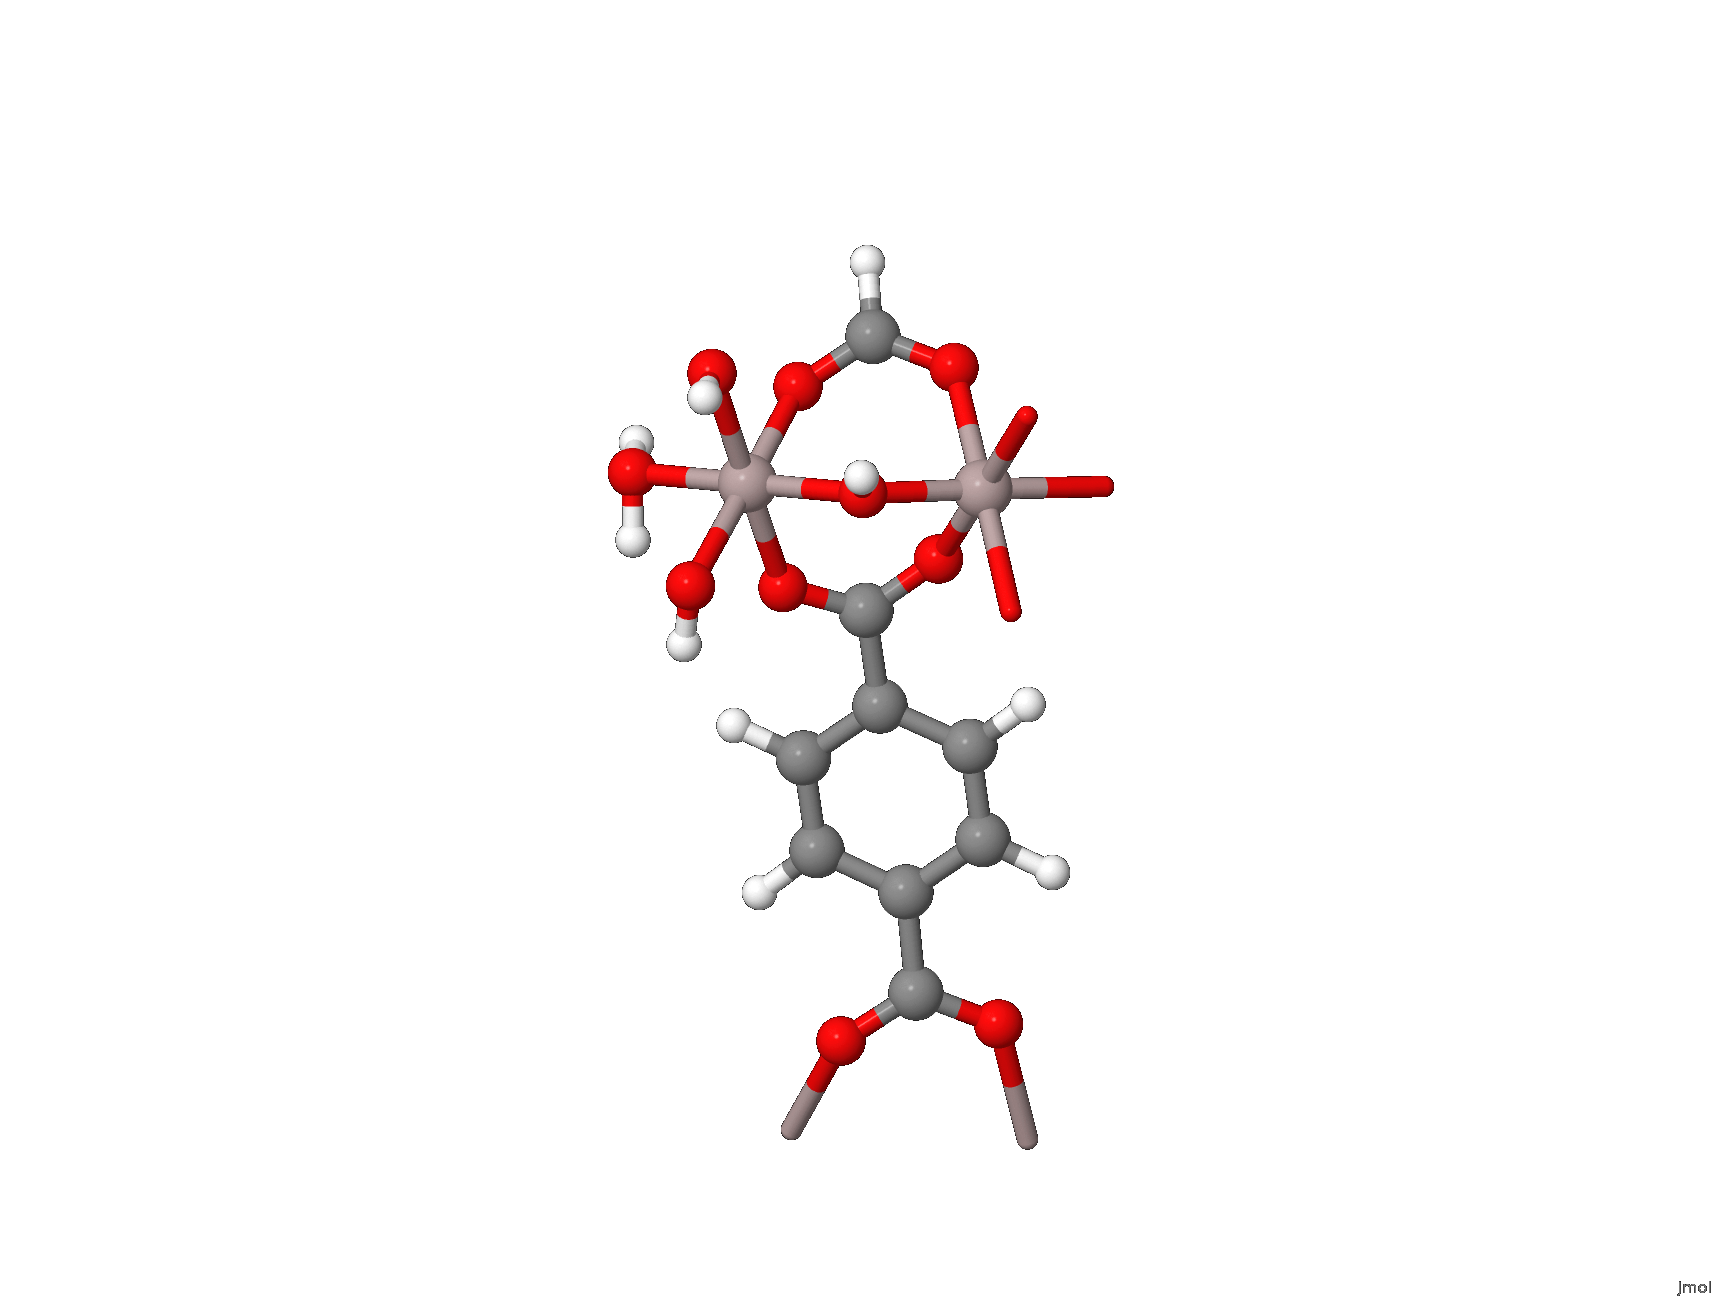


-Metal residue (Al):

*Atom number FF atom type*

Al 1 Al

-Linker (C8O4H4):

*Atom number FF atom type*

O 1 Oc

O 2 Oc

O 3 Oc

O 4 Oc

H 5 Ha

H 6 Ha

H 7 Ha

H 8 Ha


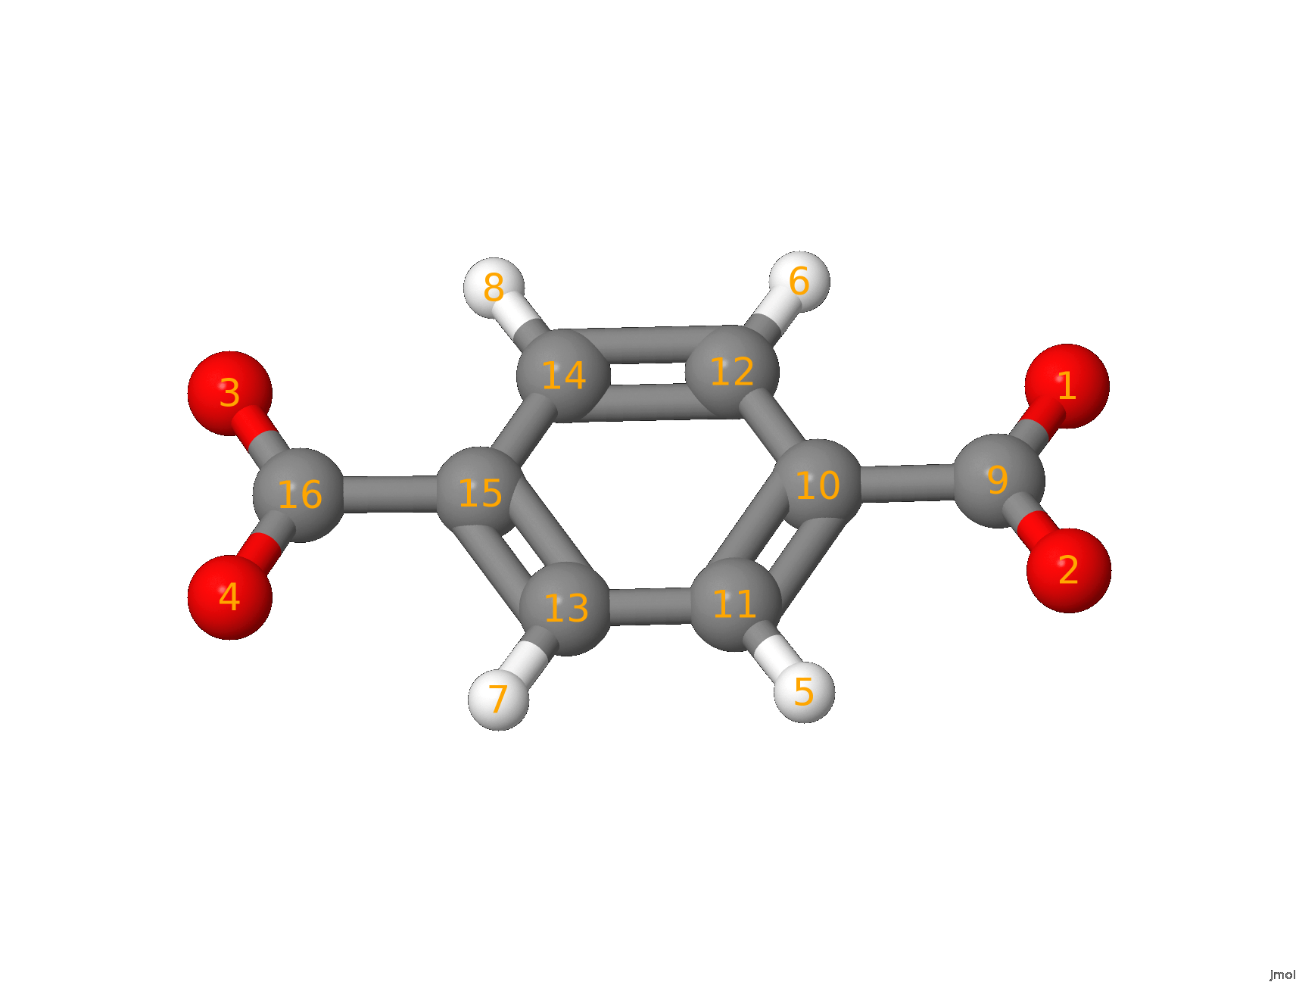
C 9 Co

C 10 Cp

C 11 Ca

C 12 Ca

C 13 Ca

C 14 Ca

C 15 Cp

C 16 Co

-Hydroxy bridge (OH):

*Atom number FF atom type*

O 1 Oh

H 2 Ho


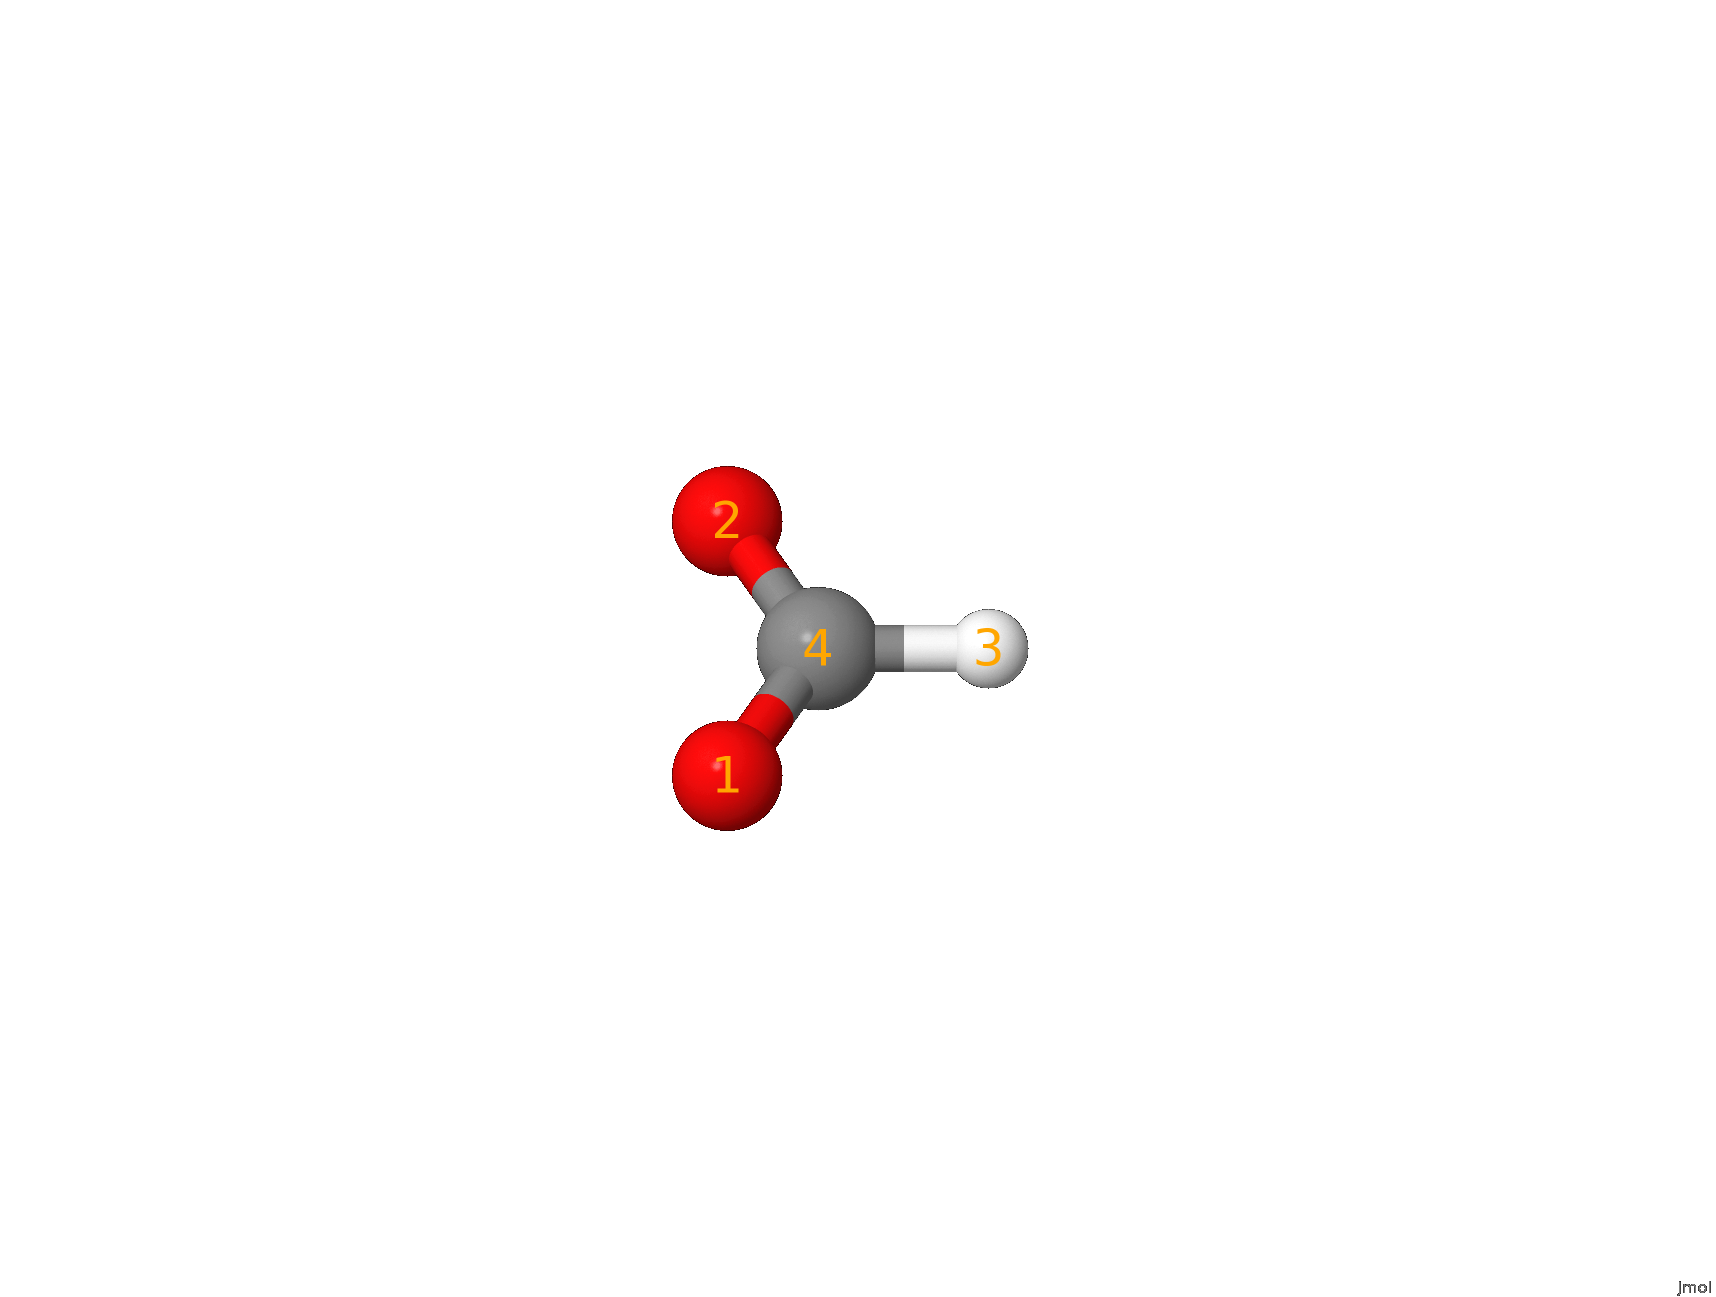


-Border residue (CO2H):

*Atom number FF atom type*

O 1 Oc

O 2 Oc

H 3 H5

C 4 Co

- Border Hydroxy (OH):

*Atom number FF atom type*

O 1 Oy

H 2 Hy

- Border water (OH2):

*Atom number FF atom type*

O 1 Ow

H 2 Hw

H 3 Hw

**MASS**

al 26.982 0.520

oh 16.000 0.465

oc 16.000 0.465

od 16.000 0.465

ow 16.000 0.465

oy 16.000 0.465

co 12.010 0.360

cp 12.010 0.360

ca 12.010 0.360

ho 1.008 0.135

ha 1.008 0.135

h5 1.008 0.135

hw 1.008 0.135

hy 1.008 0.135

**BOND STRETCHING**

al-oh 226.383 1.807

al-oc 191.193 1.905

al-od 185.625 1.910

al-oy 179.614 1.802

oh-ho 483.767 0.948

oy-hy 619.790 0.958

oc-co 532.656 1.264

od-co 515.050 1.268

co-cp 323.272 1.482

cp-ca 394.916 1.397

ca-ca 394.916 1.397

ca-ha 271.310 1.200

co-h5 319.400 1.115

al-ow 226.383 1.807

**ANGLE BENDING**

al-oh-al 267.297 125.491

al-oh-ho 88.822 114.648

al-oy-hy 17.242 122.255

al-oc-co 94.016 133.962

al-od-co 94.016 133.962

oc-al-oc 56.898 179.890

od-al-od 55.952 179.789

oh-al-oh 61.380 179.487

oc-al-od 180.099 91.440

od-al-oh 9.883 90.324

oh-al-oc 221.271 90.942

oy-al-oy 46.500 90.000

oy-al-oh 63.653 90.000

oy-al-oc 63.653 90.000

oy-al-od 63.653 90.000

oy-al-ow 46.500 90.000

oc-co-oc 290.609 124.241

od-co-od 287.813 123.089

oc-co-cp 290.848 117.674

od-co-cp 290.848 117.674

co-cp-ca 284.293 120.197

cp-ca-ca 136.436 120.261

cp-ca-ha 82.144 121.174

ca-cp-ca 136.436 120.261

ca-ca-ha 82.144 121.174

oc-co-h5 55.501 123.760

od-co-h5 55.501 123.760

ow-al-oc 221.271 90.942

ow-al-od 221.271 90.942

ow-al-oh 221.271 90.942

ow-al-ow 55.952 179.789

al-ow-hw 88.822 114.648

**TORSION**

al-oc-co-cp 1 1.516 180.000 2.000

al-od-co-cp 1 1.516 180.000 2.000

al-oc-co-h5 1 1.516 180.000 2.000

oc-co-cp-ca 1 2.175 180.000 -2.000

oc-co-cp-ca 1 0.300 0.000 3.000

od-co-cp-ca 1 2.175 180.000 -2.000

od-co-cp-ca 1 0.300 0.000 3.000

co-cp-ca-ca 1 6.650 180.000 2.000

co-cp-ca-ha 1 6.650 180.000 2.000

cp-ca-ca-ha 1 6.650 180.000 2.000

ca-cp-ca-ha 1 6.650 180.000 2.000

ha-ca-ca-ha 1 6.650 180.000 2.000

**OUT-OF-PLANE**

cp-oc-oc-co 1.100 180.0000 2.000

co-ca-ca-cp 1.100 180.0000 2.000

ca-cp-ha-ca 1.100 180.0000 2.000

ca-ca-ca-ha 1.100 180.0000 2.000

co-ca-cp-ca 1.100 180.0000 2.000

ca-ca-cp-co 1.100 180.0000 2.000

**NON-BONDED**

al 2.36 0.115918

oh 1.82 0.059034

oc 1.82 0.059034

od 1.82 0.059034

oy 1.82 0.059034

ow 1.82 0.059034

co 1.94 0.055927

cp 1.94 0.055927

ca 1.94 0.055927

ho 1.60 0.016013

ha 1.60 0.016013

hw 1.60 0.016013

h5 1.60 0.016013

hy 1.60 0.016013

**
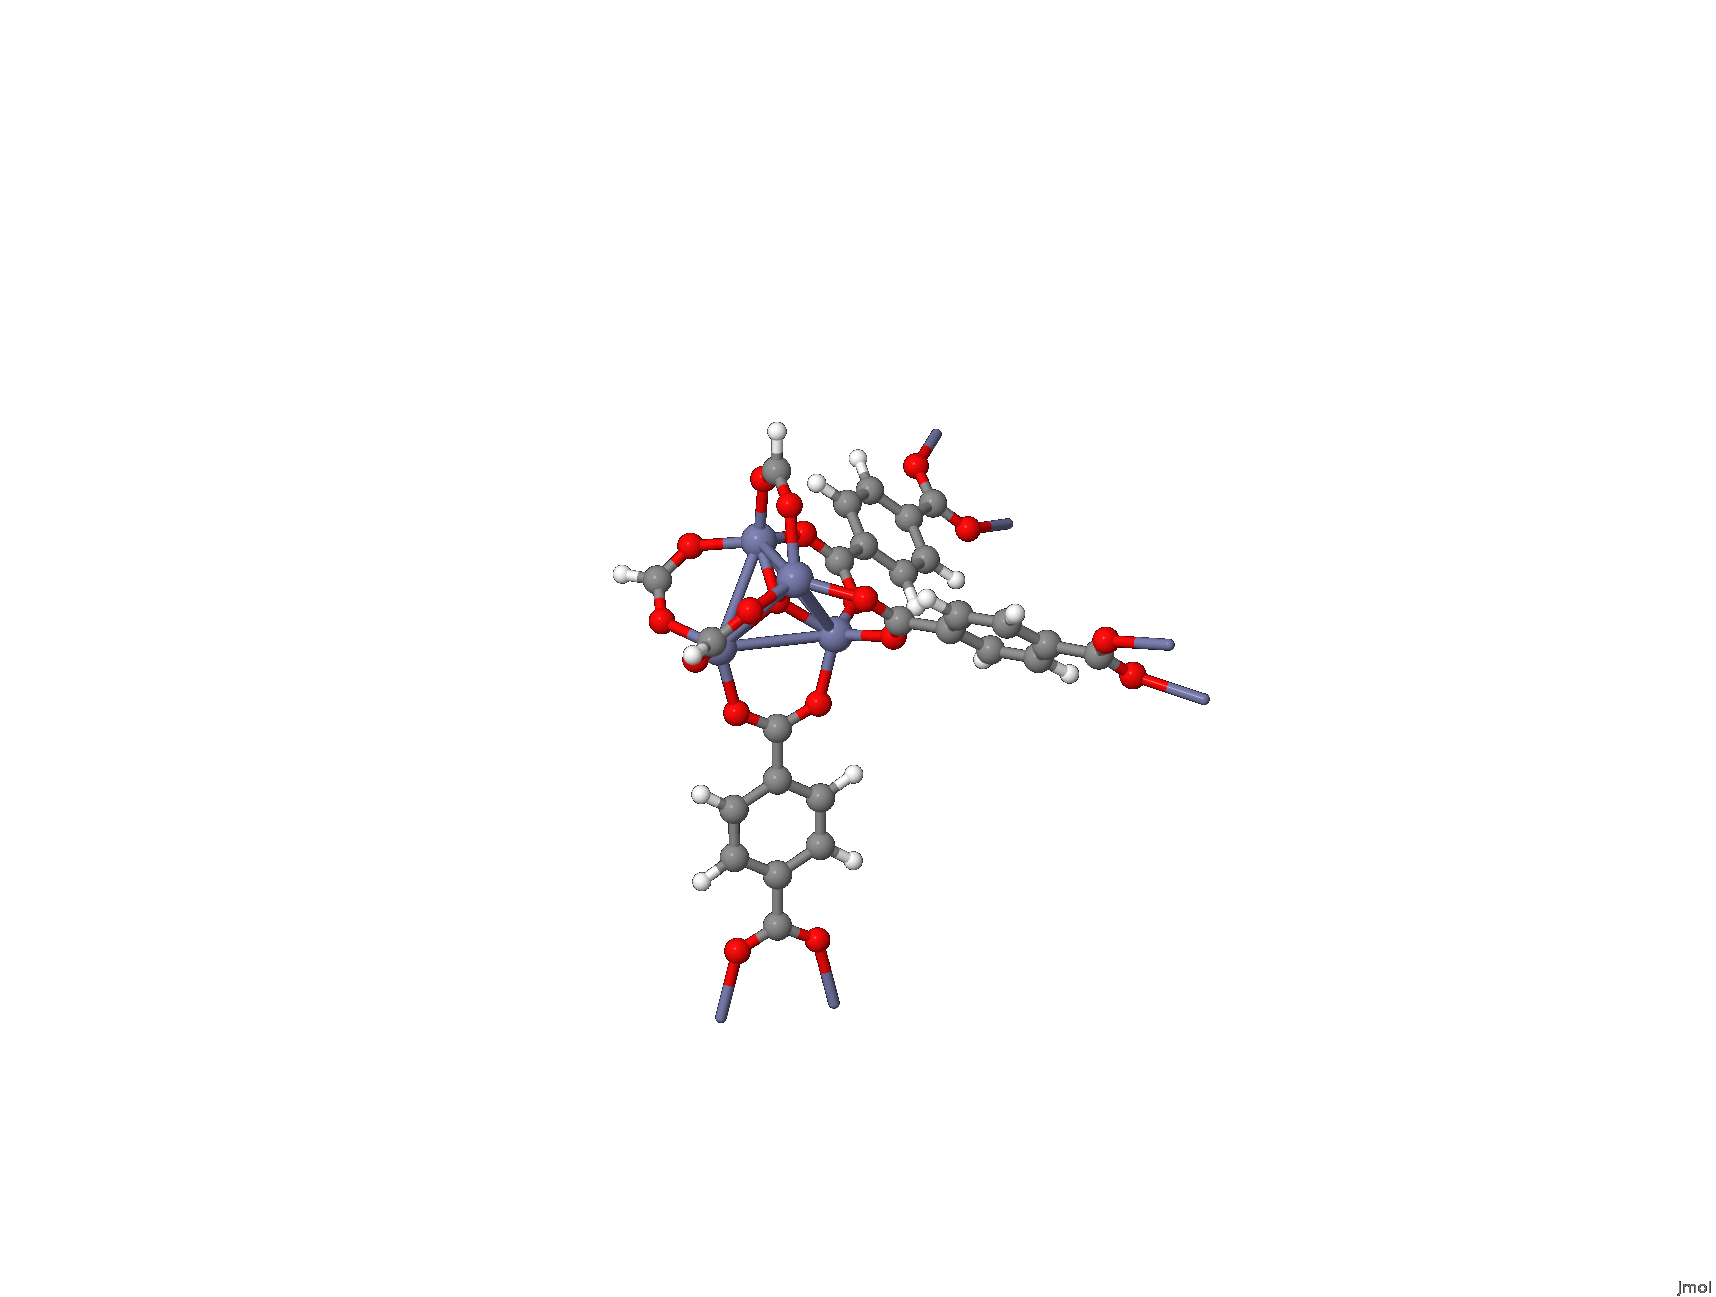
**

### Section S6.3: Force Field MOF-5

-Metal residue (Zn4O):

*Atom number FF atom type*

Zn 1 Zn

Zn 2 Zn

Zn 3 Zn

Zn 4 Zn


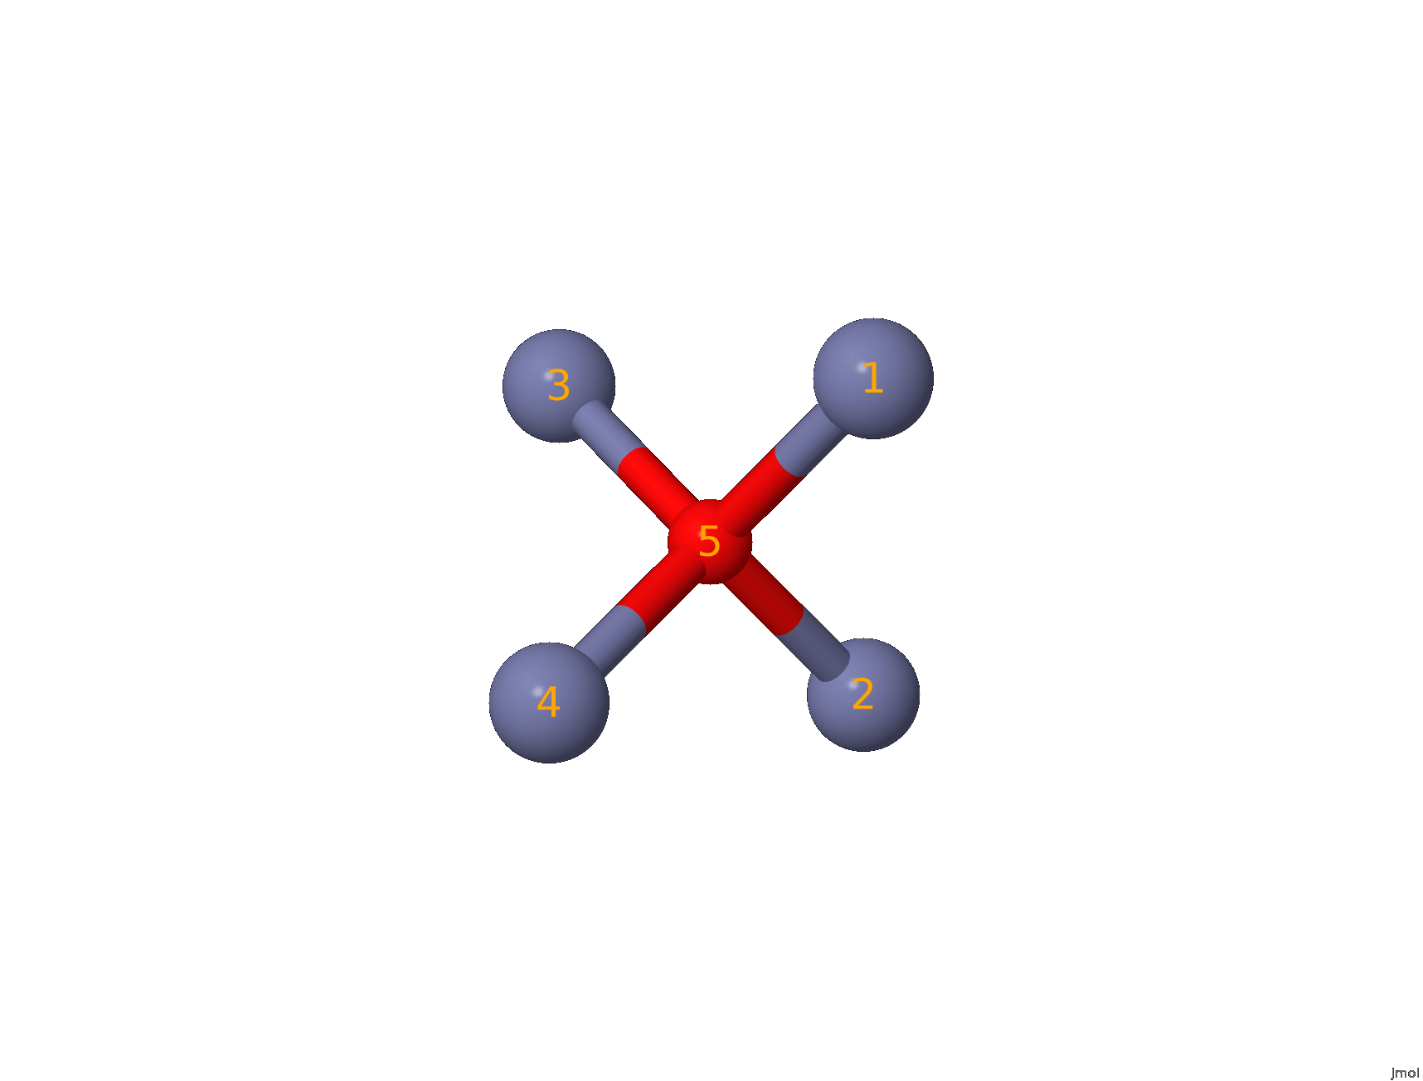
O 1 Os

-Linker (C8O4H4):

*Atom number FF atom type*

O 1 O

O 2 O

O 3 O


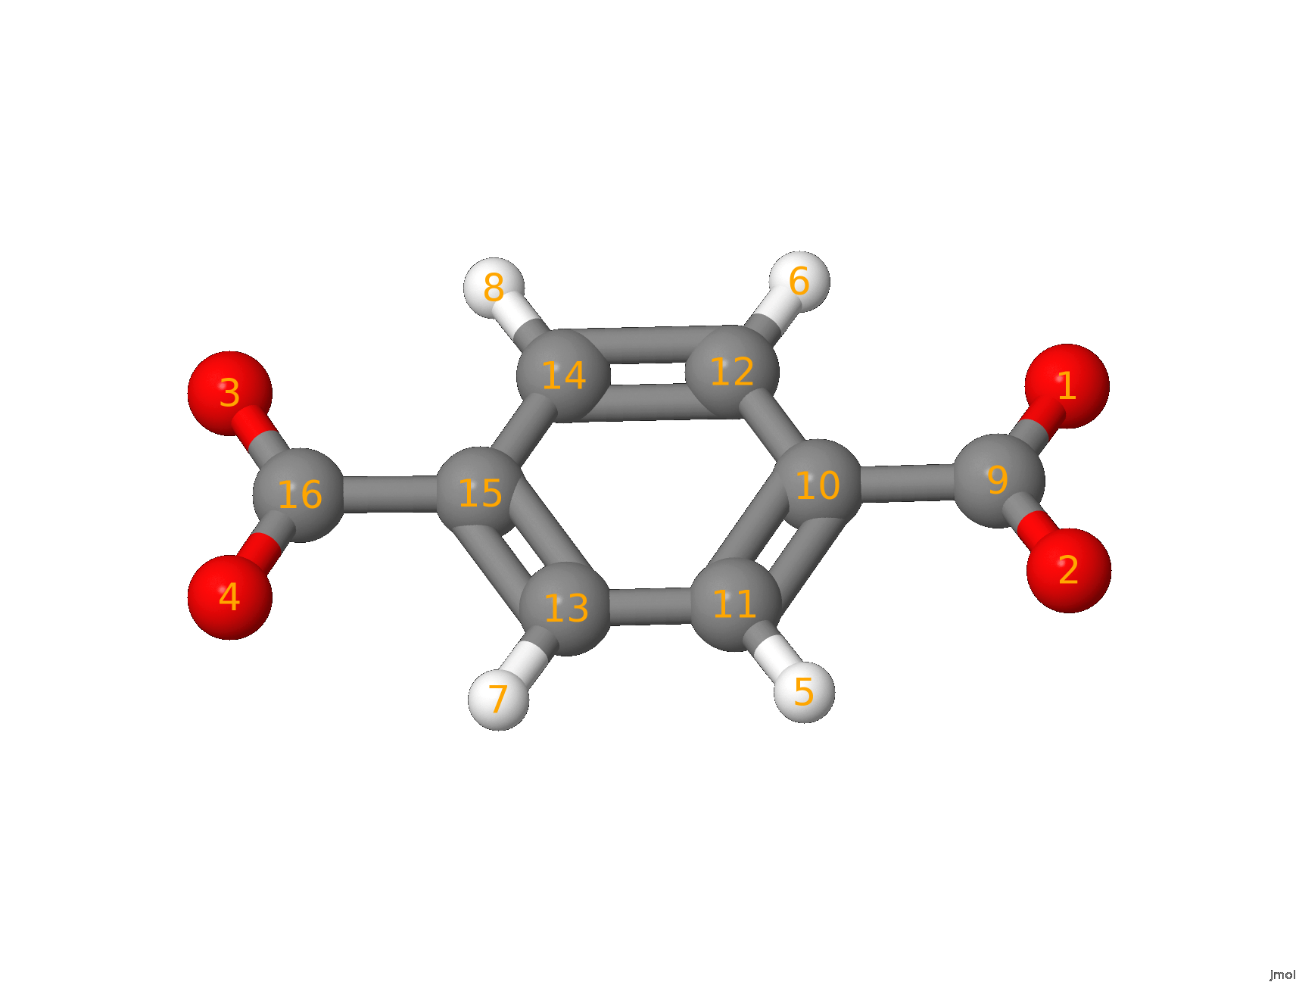
O 4 O

H 5 Ha

H 6 Ha

H 7 Ha

H 8 Ha

C 9 C

C 10 Ca

C 11 Ca

C 12 Ca

C 13 Ca

C 14 Ca

C 15 Ca

C 16 C


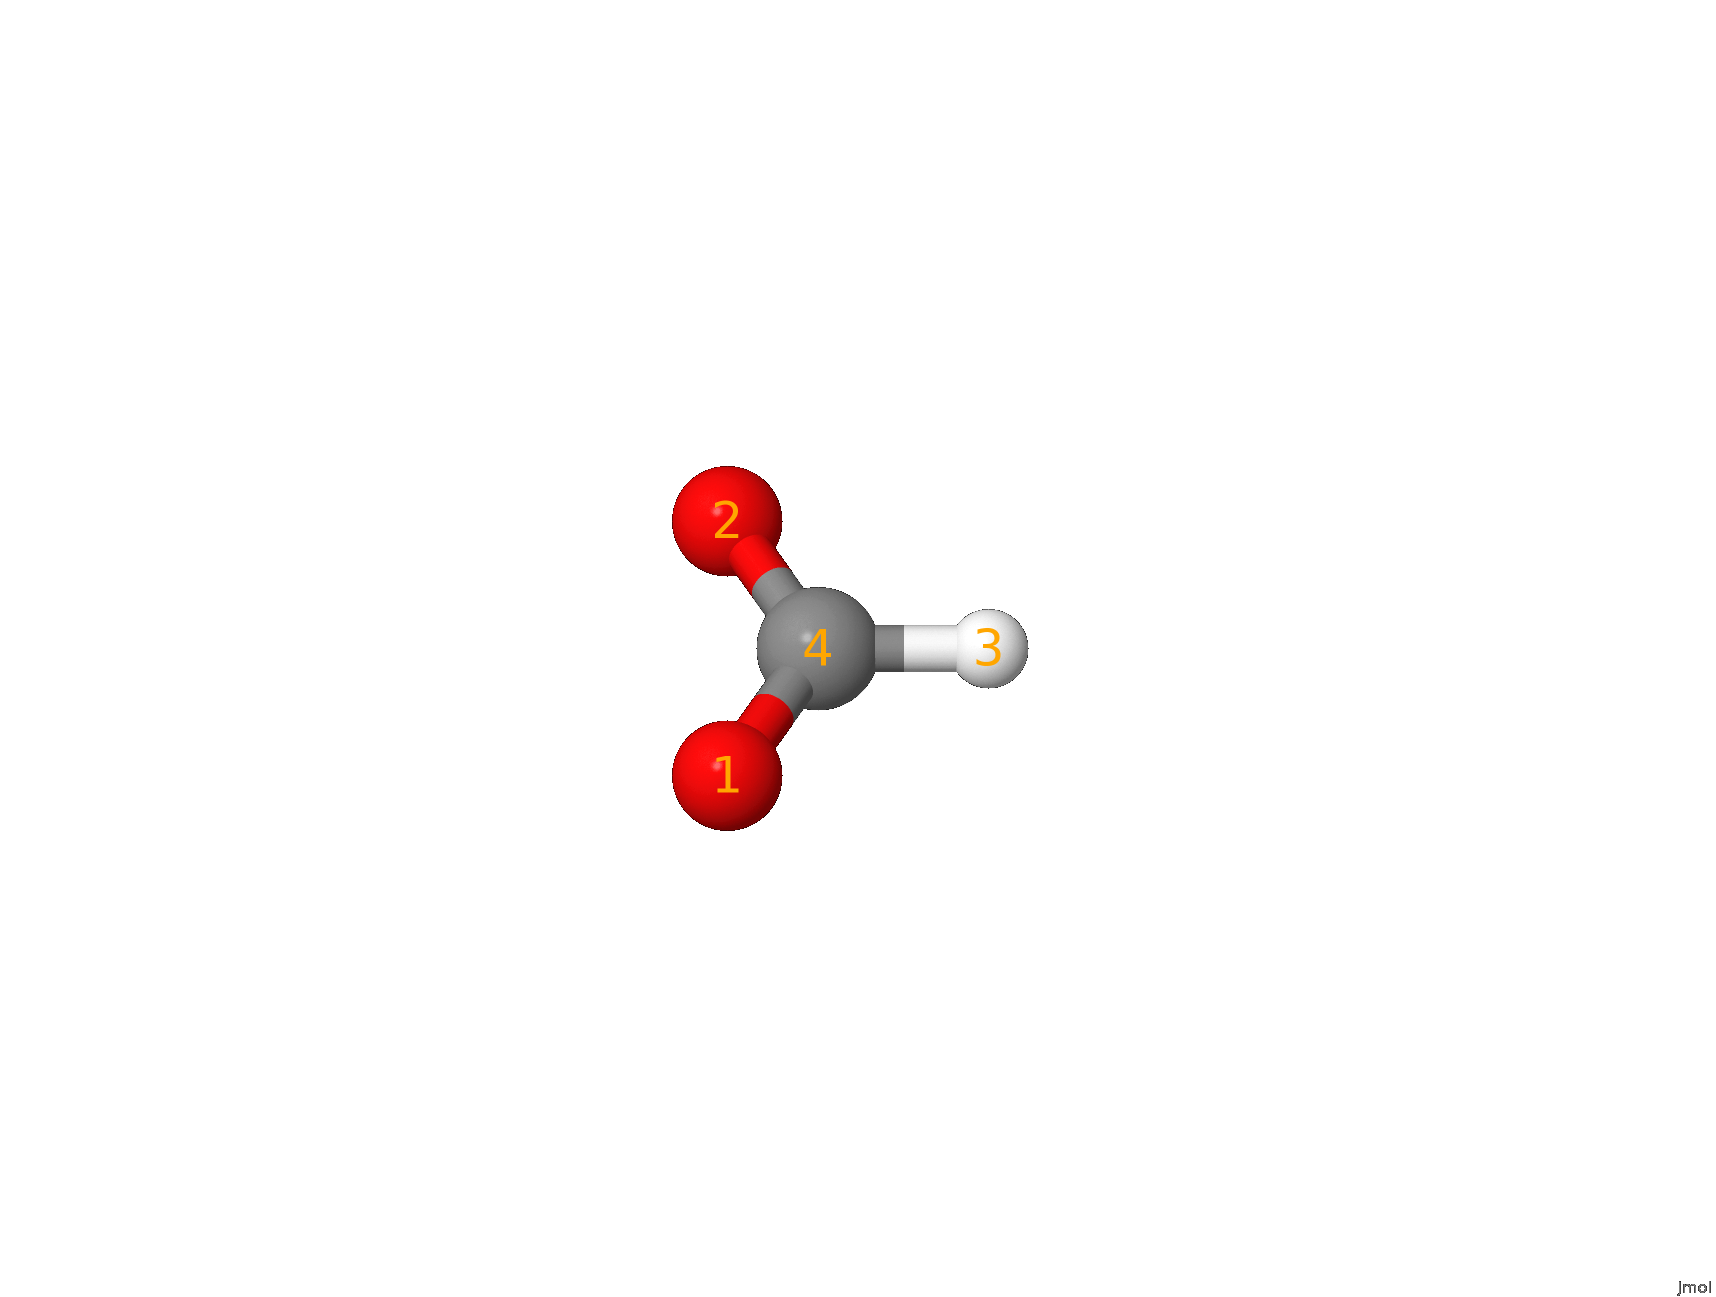
-Border residue (CO2H):

*Atom number FF atom type*

O 1 O

O 2 O

H 3 H5

C 4 C

**MASS**

zn 65.38 0.999

o 16.00 0.434

os 16.00 0.465

c 12.01 0.616

ca 12.01 0.360

ha 1.008 0.135

h5 1.008 0.135

**BOND STRETCHING**

c -o 637.70000 1.2183

o -zn 61.13030 2.0150

zn-os 61.13030 2.0750

ca-o 542.26172 1.2850

ca-ca 471.78208 1.3800

c -ca 348.08312 1.4800

h5-c 319.40000 1.1150

**ANGLE BENDING**

zn-os-zn 28.76720 109.471

o -zn-os 21.57540 111.300

o -zn-o 15.82196 107.600

c -o -zn 30.92474 131.200

o -c – o 46.02752 125.500

ca-ca- c 52.50014 120.000

o – c-ca 56.09604 117.000

h5-c -o 55.50125 123.760

**TORSION**

ca-ca- c- o 1 1.0 180.0 2.0

os-zn- o- c 1 5.0 180.0 2.0

zn-os-zn- o 1 5.0 180.0 2.0

zn- o- c- c 1 5.0 180.0 2.0

zn -o- c-ca 1 5.0 180.0 2.0

zn-o -c -h5 1 1.6 180.0 2.0

**OUT-OF-PLANE**

o -o -c -ca 16.54 180.0 2.0

ca-ca-ca-ha 1.1 180.0 2.0

c -ca-ca-ca 1.1 180.0 2.0

ca-o -c -o 1.1 180.0 2.0

**NON-BONDED**

zn 2.29 0.276

os 1.82 0.059

o 1.82 0.059

c 1.94 0.056

ca 1.94 0.056

ha 1.62 0.020

###

### Section S6.4: QM part, MM part


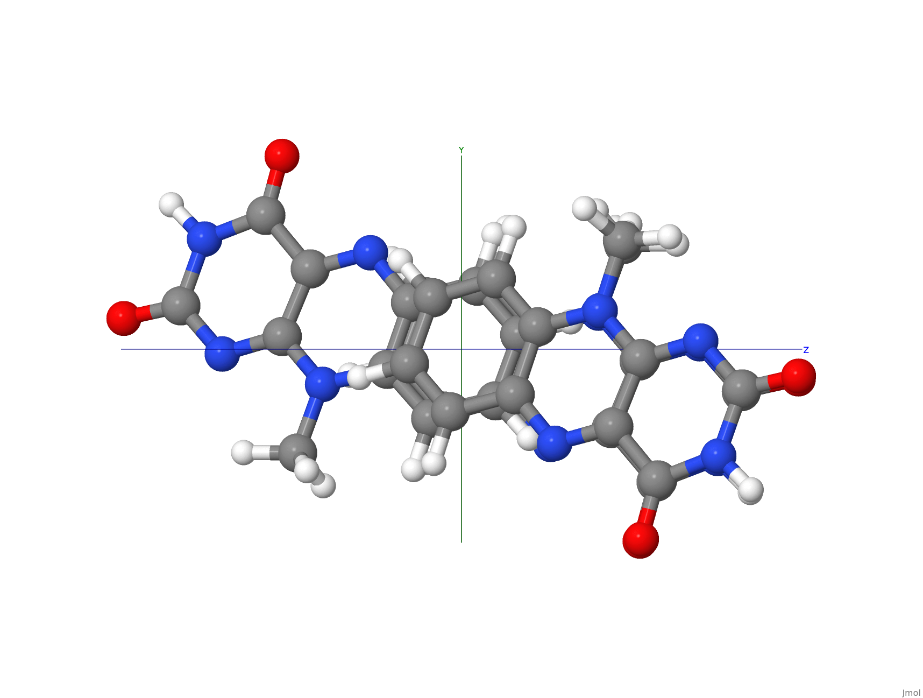

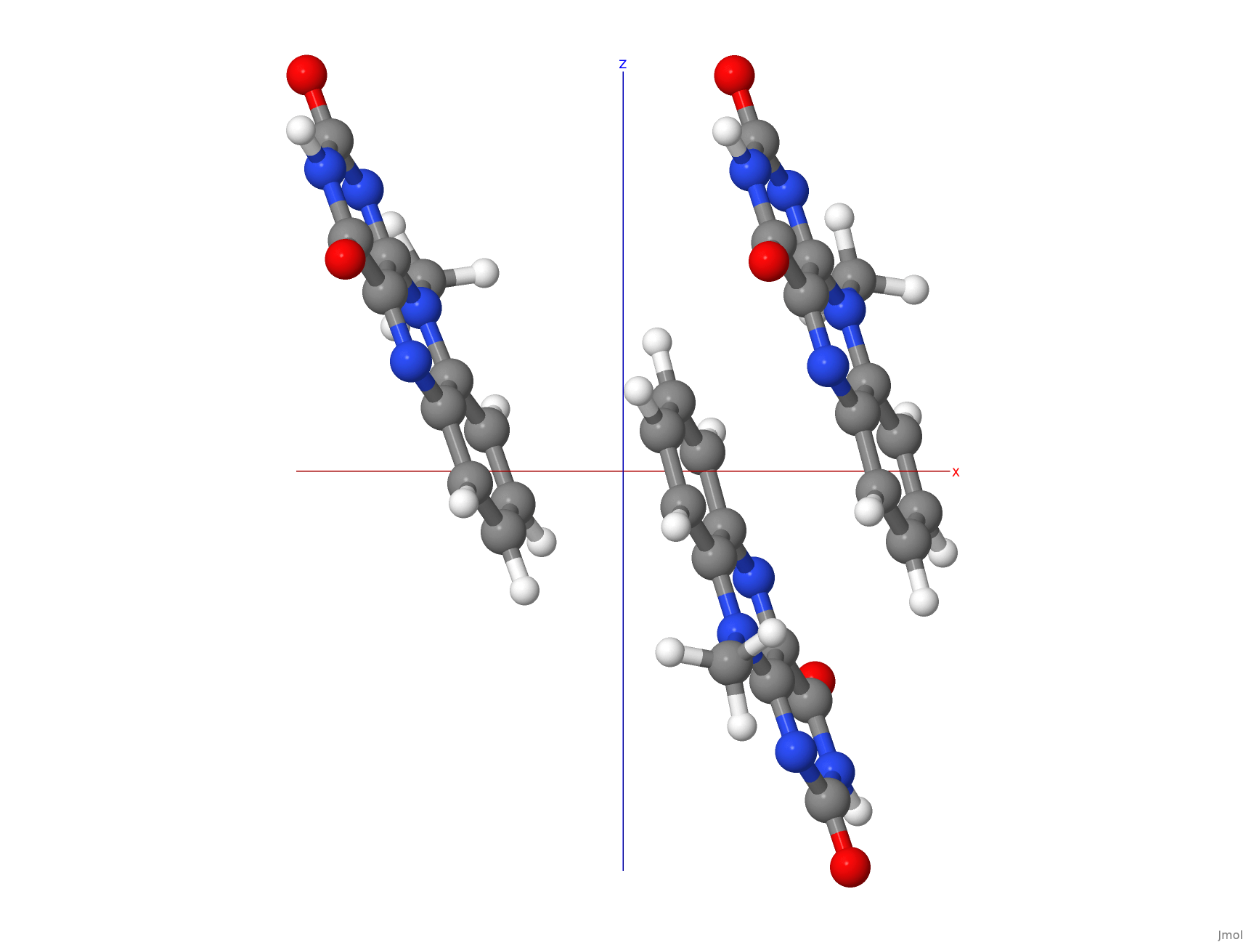


**Figure S35.** QM-Layer including three MIA molecules. During QM/MM-optimizationonly QM atoms were allowed to move (mobile layer), the remaining atom position were fixed at their optimized values from the corresponding plane-wave calculation with QuantumEspresso [[[23]](#endnote-23)]. (left: view along X axis, right: view along Y axis).


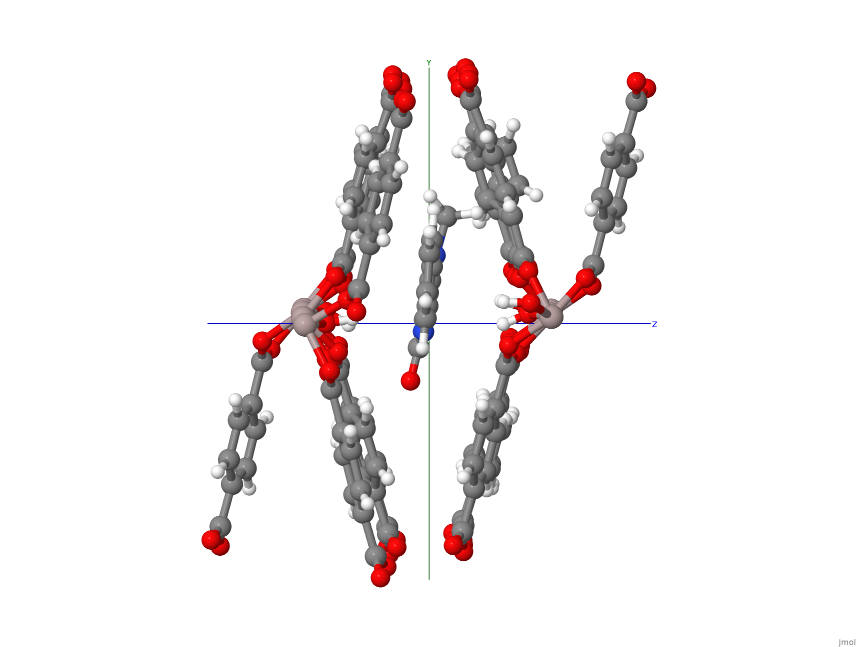

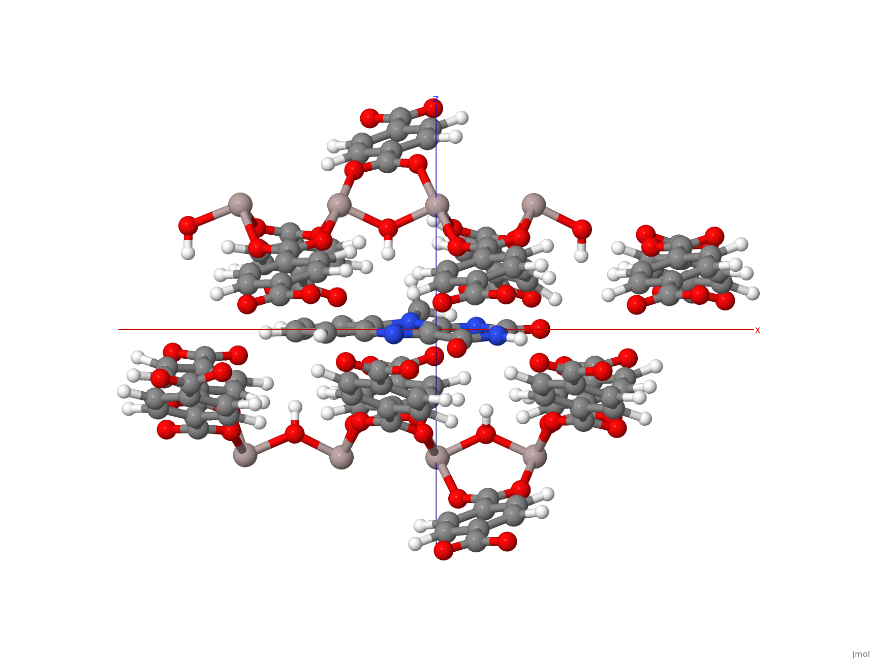


**Figure S36.** The mobile layer in MIL-53(Al) contains MIA and all residues that have at least 1 atom in a radius of 7.5 Å around the MIA chromophore (QM layer (MIA) and movable MM portion (MOF), left: view along X axis, right: view along Y axis). The remaining atoms (not shown) were fixed at their optimized positions from the plane-wave computation with QuantumEspresso [23].


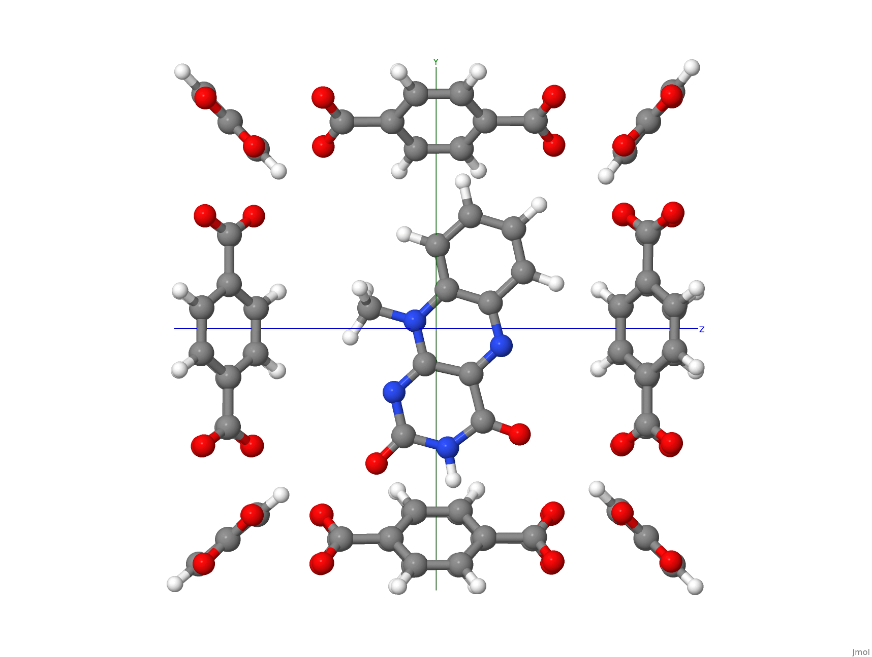

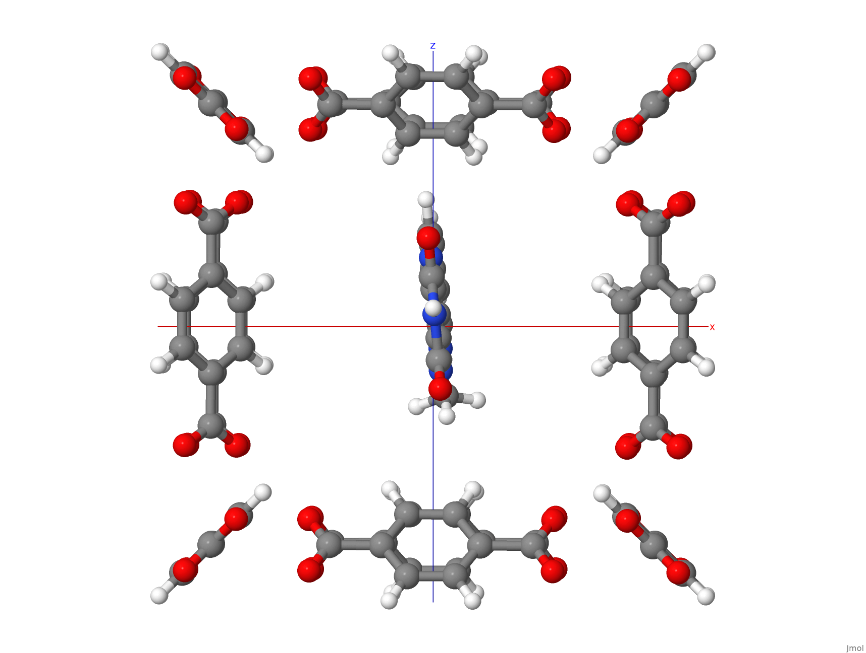


**Figure S37.** The mobile layer in both *inward* and *outward* pores of MOF-5, containing MIA and all residues that have at least one atom within a radius of 5.0 Å around the MIA chromophore. Zn4O residues and the remaining portion of the MOF were kept fixed at their plane-wave optimized positions. (QM layer (MIA) and medium layer (MOF), left: view along X axis, right: view along Y axis).

**Cluster for MIL-53(Al) Force Field generation:**

The same cluster as presented in the work of Vanduyfhuys et al. [[[24]](#endnote-24)] was used to generate the MIL-53(Al) force field (Figure S38). The total charge was –1. It was first geometry-optimized with the B3LYP hybrid functional and the 6-311++G(d,p) basis set, followed by vibrational analysis using the Gausian16 package [[[25]](#endnote-25)].


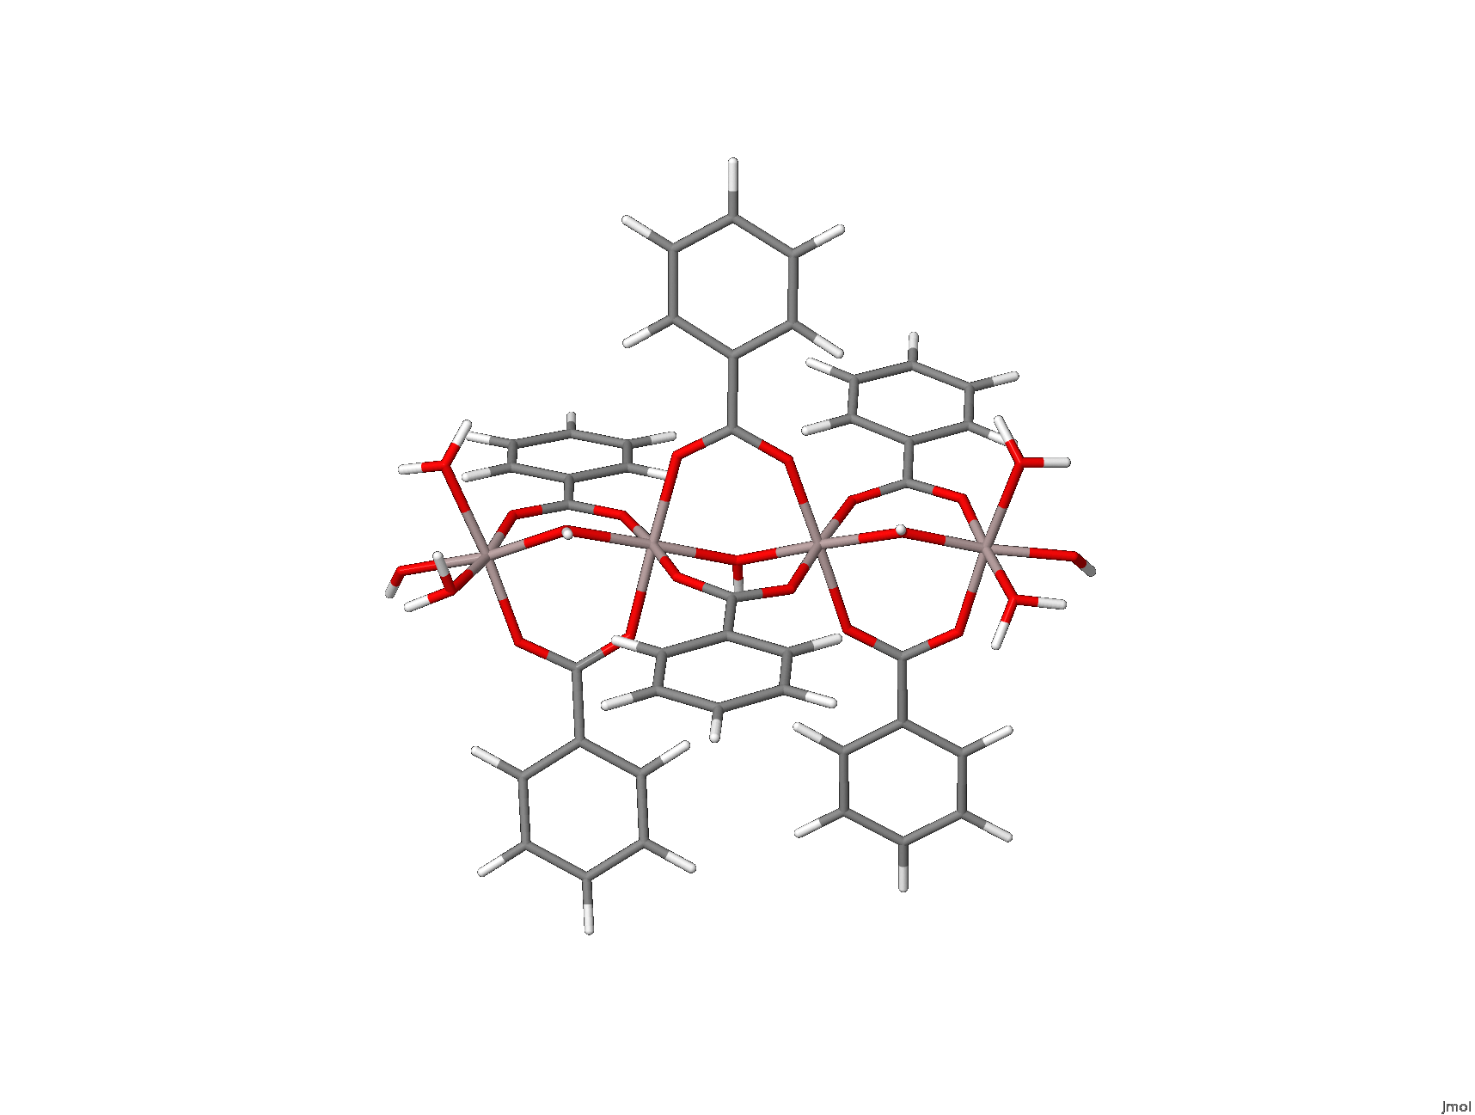


**Figure S38.** Cluster model of Vanduyfhuys et al. [24] used for generating the MIL-53(Al) force field used in this work.

**Table S3.** Crystallographic data for MIL-53 phases (powder data with Rietveld refinement from literature) and MIL-53 (computed).

| Compound | experiment.  MIL-53-lp *a* | computed  MIL‑53-lp *b* | experiment.  MIL-53-np *a,c* | computed  MIA@MIL‑53 *b* |
| --- | --- | --- | --- | --- |
| Crystal system | orthorhombic | unconstrained (triclinic) | monoclinic | unconstrained (triclinic) |
| Space group | *Imma* | unconstrained  (*P*1) | *Cc* | unconstrained  (*P*1) |
| a [Å] | 6.6085(9) | 6.8904 | 19.513(2) | 20.1698 *d* |
| b [Å] | 16.675(3) | 16.4224 | 7.612(1) | 18.8673 |
| c [Å] | 12.813(2) | 13.5000 | 6.576(1) | 8.9399 |
| α [°] | 90 | 90 | 90 | 89.92 |
| β [°] | 90 | 90 | 104.24(1) | 90.31 |
| γ [°] | 90 | 90 | 90 | 87.29 |
| V [Å3] | 1411.95(40) | 1527.62 | 946.74(10) | 3398.21 |

a CCDC no. 220476 (lp), 220477 (np) [6]. b Cell parameters refined through Quantum Espresso.
c The cell setting/orientation of the coordinate system in the experimental structure of MIL-53-np is different from those of the other three (exp. and comput.) structures. To facilitate a comparison of the axes lengths, matching directions are given in the same color. d Note that in computed MIA@MIL-53 the *a* axis (channel direction) was extended to about three times the corresponding axis length in experimental MIL-53-lp or -np (ca. 6.6 Å) to accommodate separated MIA molecules with their length of 12 Å (cf. Figure S11).

(a)
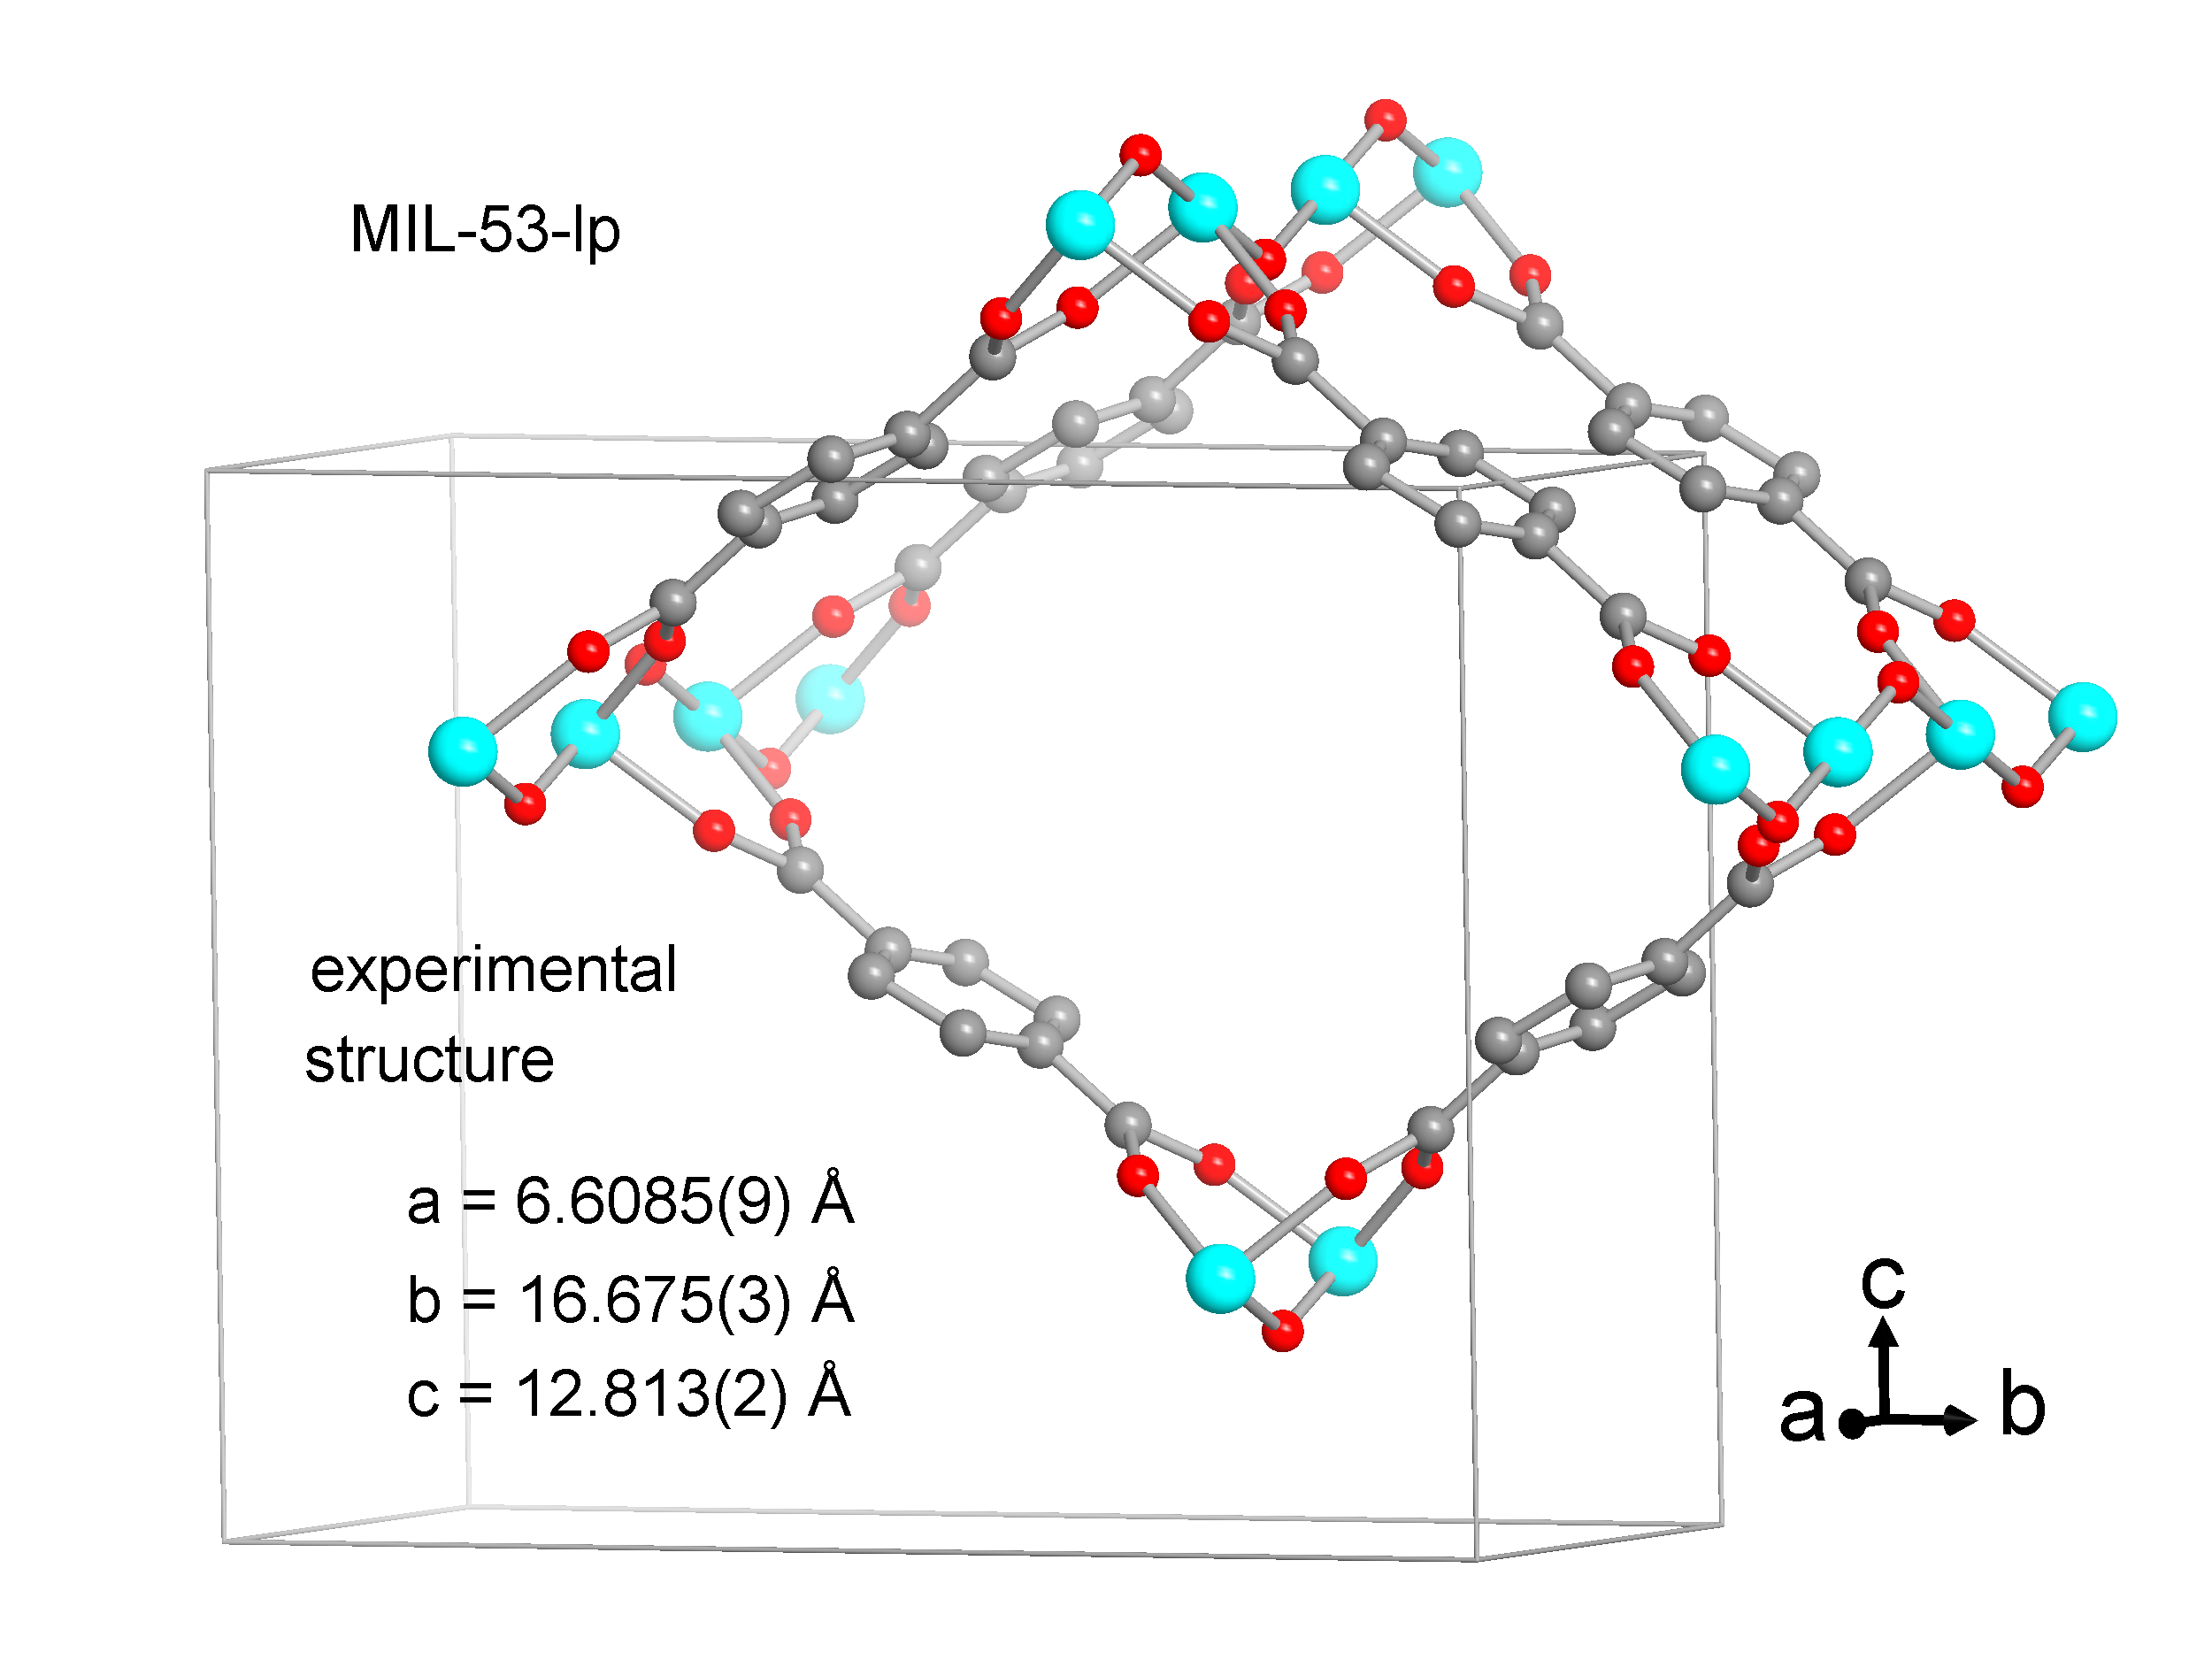


(b)
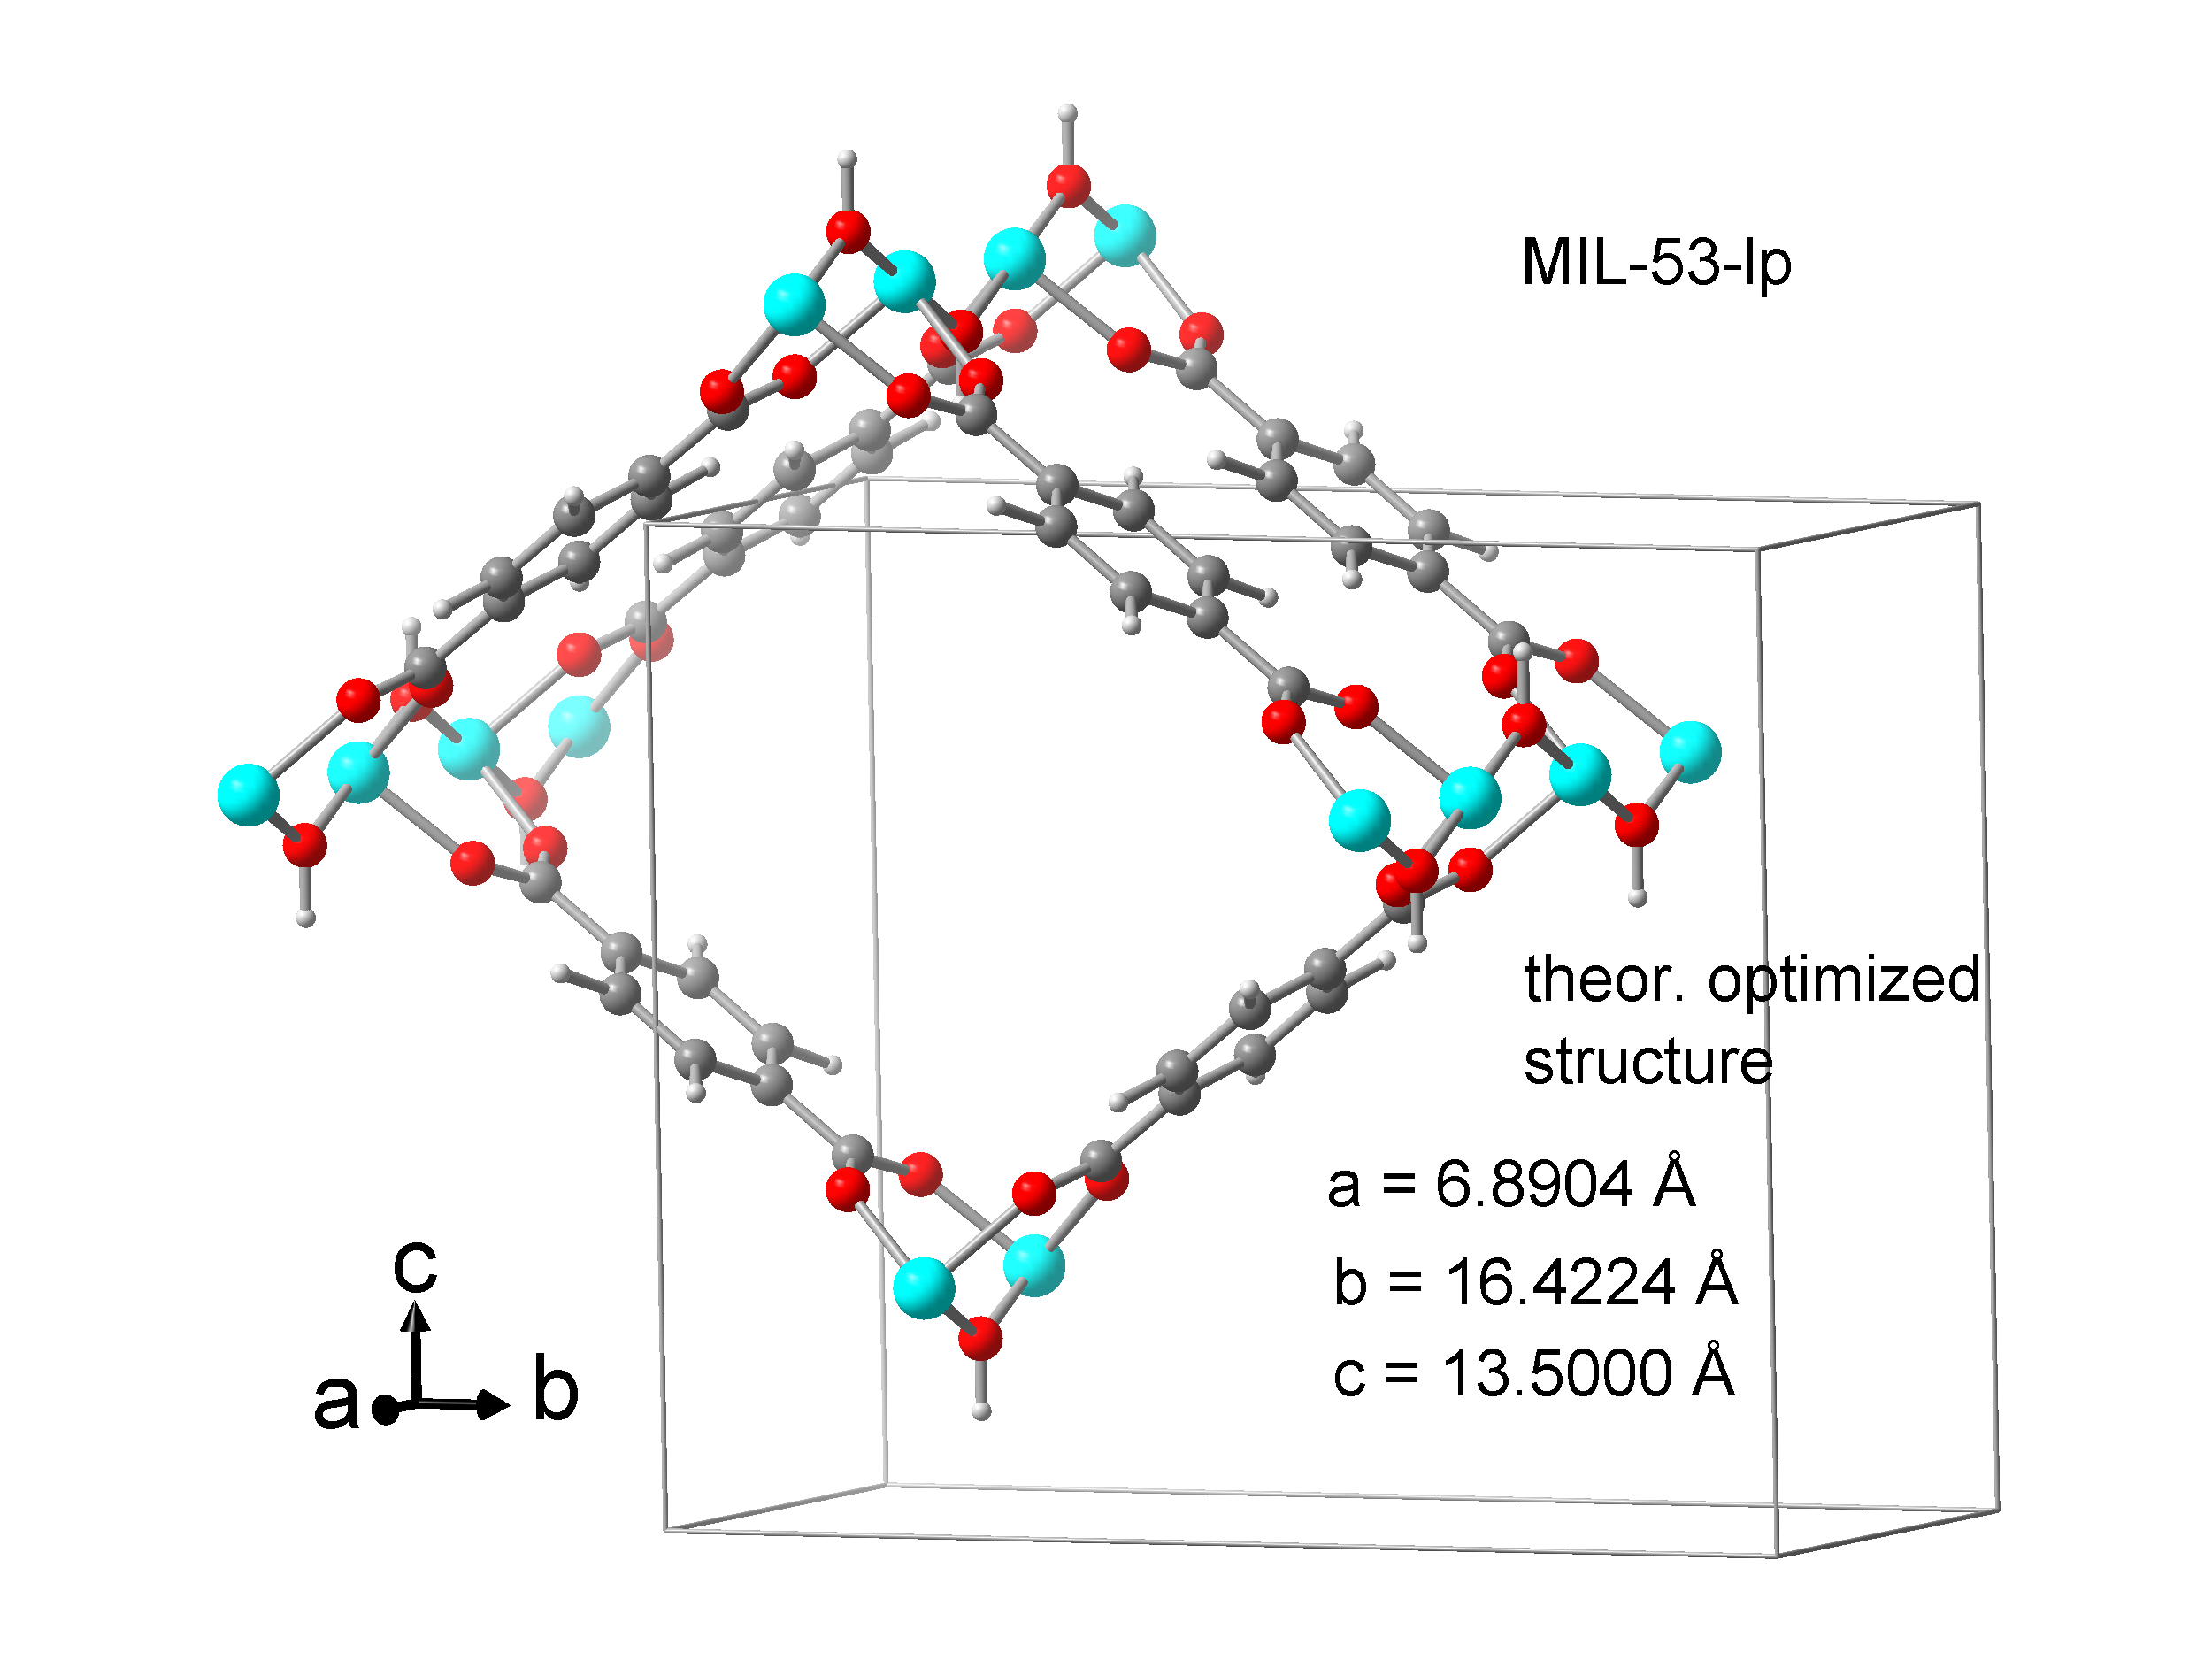


**Figure S39.** Sections of the structures with the cell edges and cell constants of MIL-53-lp from (a) experimental Rietveld refinement (CCDC no./Refcode 220476/SABVUN) [6] and (b) from theoretical optimization with QuantumEspresso (see also Table S3). Compared to the experimental orthorhombic large-pore form MIL-53-lp the computed guest-free MIL-53-lp structure after optimization widens by ca. 0.3 Å and 0.7 Å in a- and c-directions, respectively, while it shrinks by ca. 0.25 Å in the b-direction, with the cell angles remaining at 90°

(a)
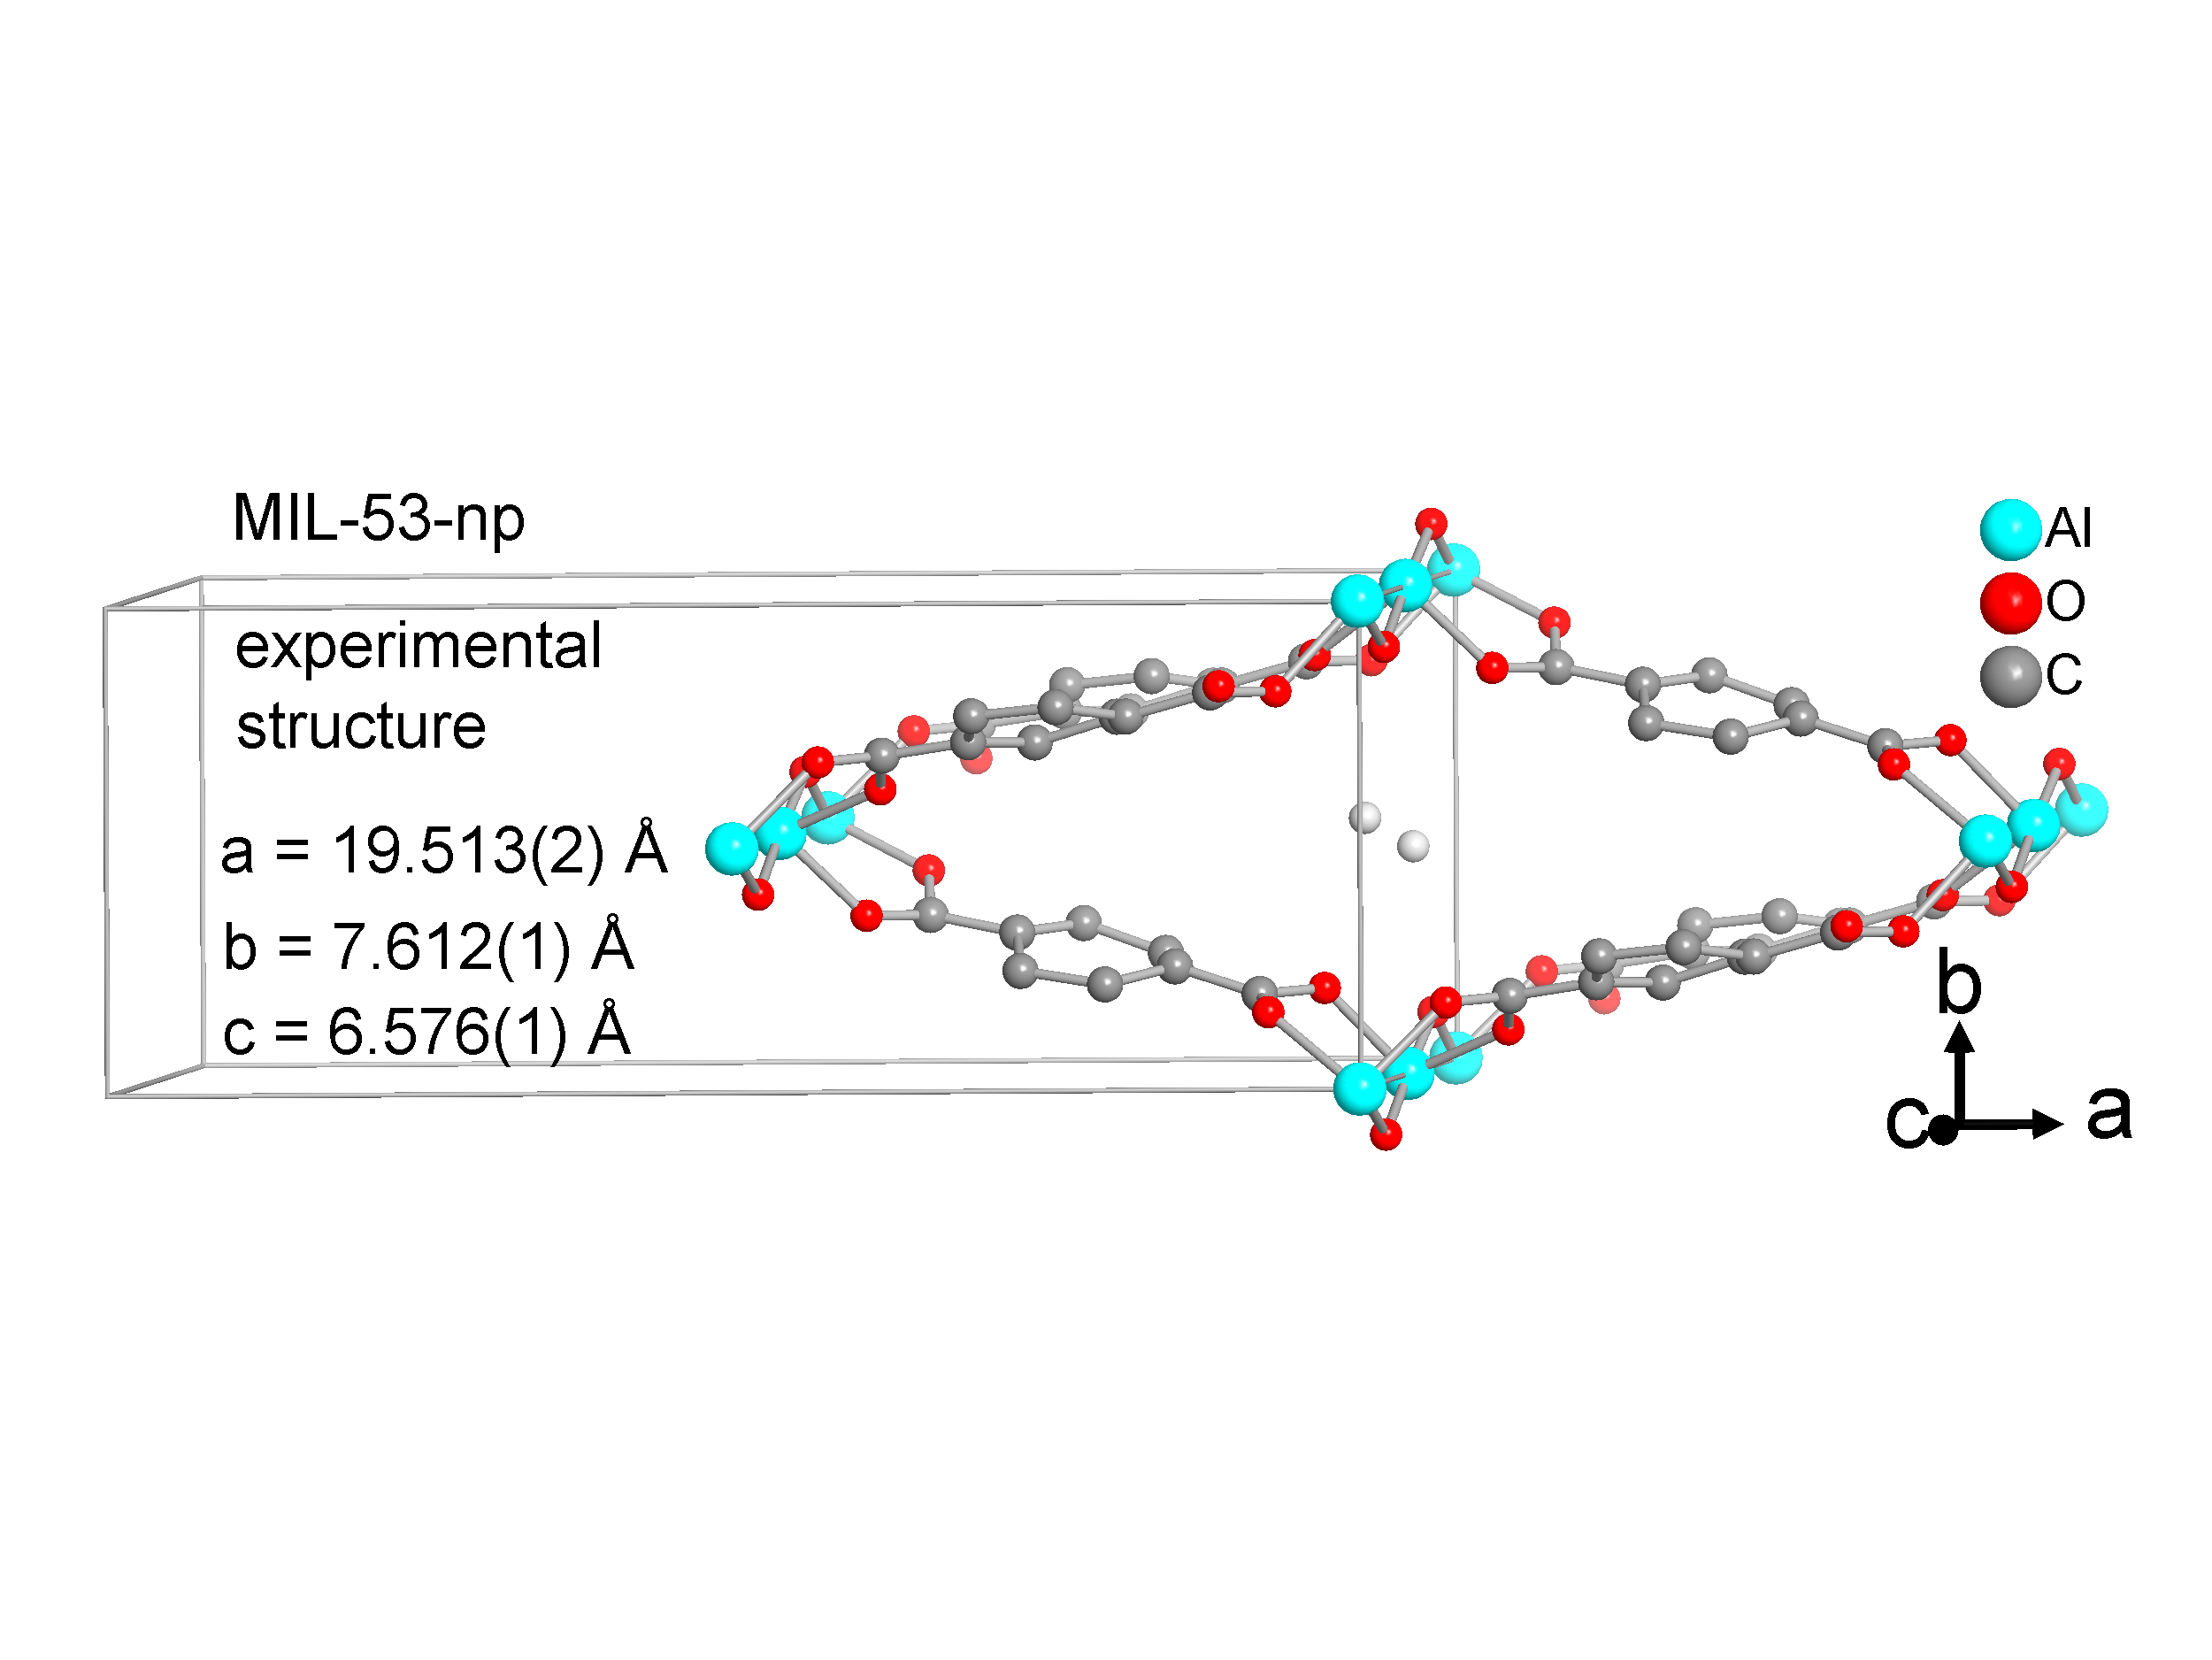


(b)
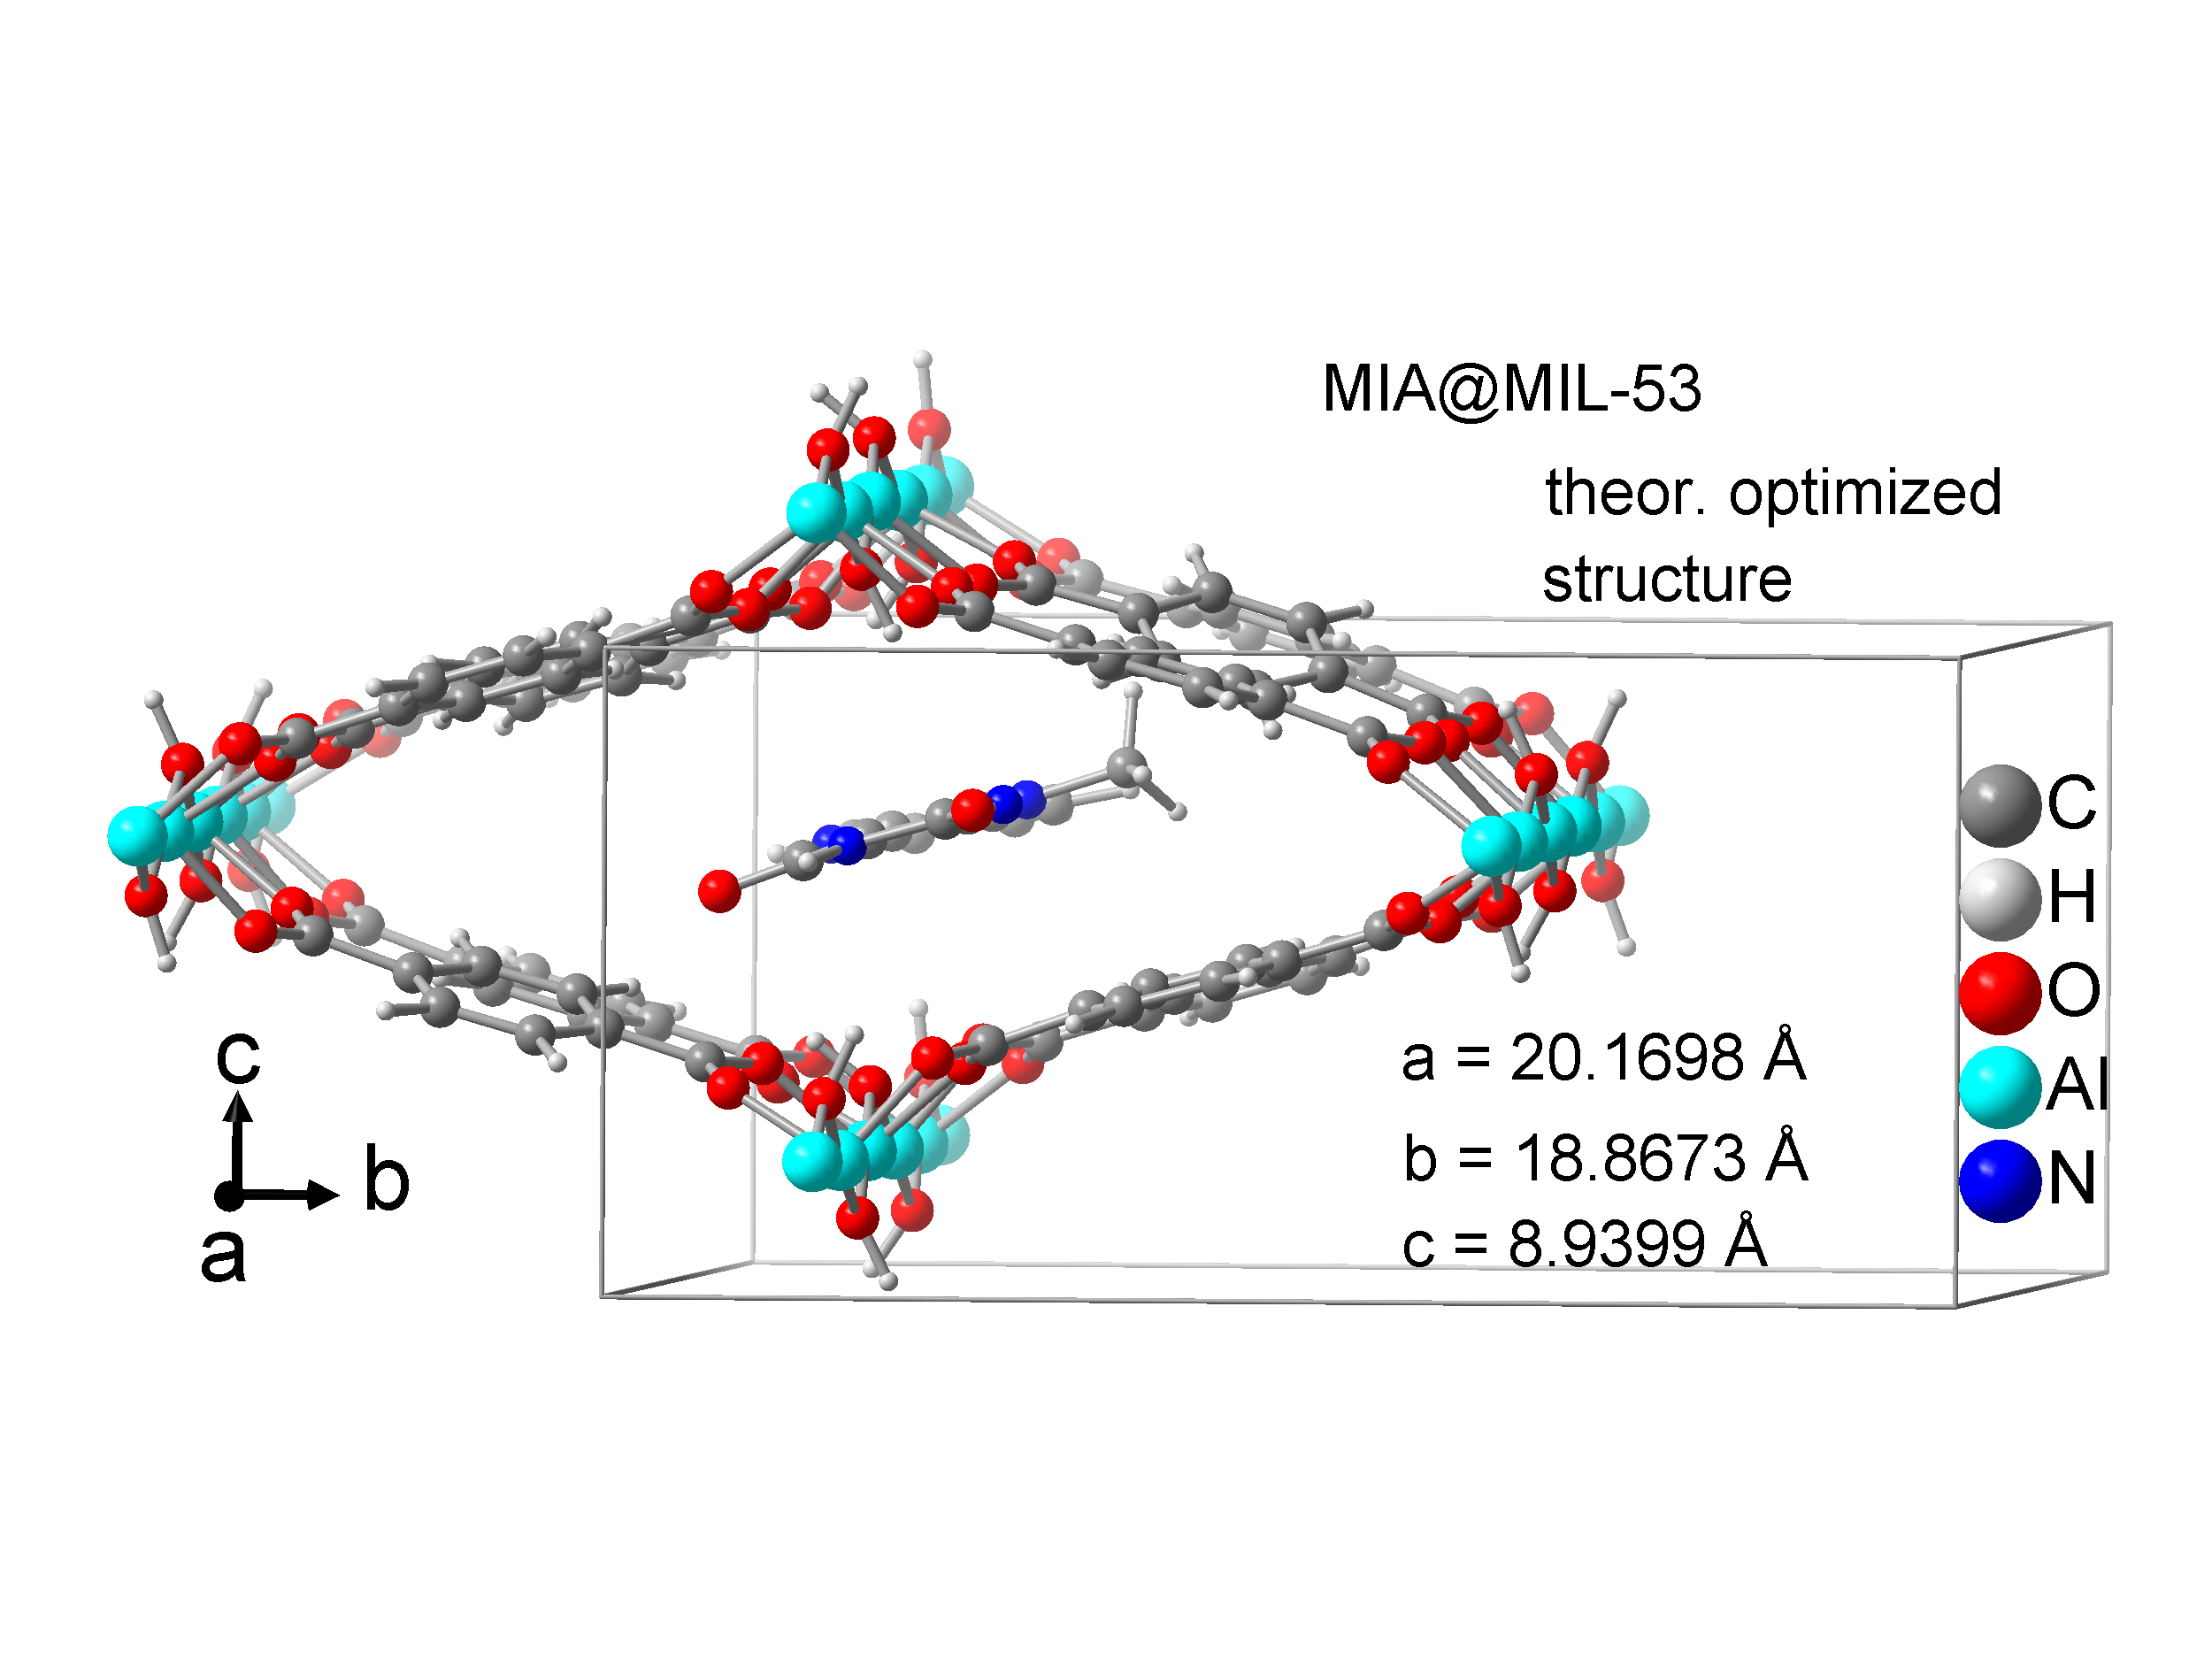


**Figure S40.** Sections of the structures with the cell edges and cell constants of (a) MIL-53-np from experimental Rietveld refinement (CCDC no./Refcode 220477/SABWAU) [6] and of (b) MIA@MIL-53 from theoretical optimization with QuantumEspresso. The theoretical cell setting/orientation of the coordinate system in (b) is the same as in the MIL-53-lp structures in Figure S39 but different to the MIL-53-np structure in (a). However, the axis parallel to the channel direction in MIA@MIL-53 (*a* axis, ca. 20 Å) was extended to about three times the corresponding axis length in experimental MIL-53-lp or -np (ca. 6.6 Å) to accommodate separated MIA molecules in the channels (cf. MIA length of 12 Å in Figure S11) (see also Table S3).

### Section S6.5: Transition dipole moments of MIA

The orientations of the transition dipole moment vector (TDM) were obtained from the quantum-chemical calculations for S0-> S1 (absorption) and for S1-> S0 (fluorescence) (see example in Figure S41). The vector coordinates are as follows:

| **MIA in vacuum** | | | |
| --- | --- | --- | --- |
| TDM | x | y | z |
| Absorption (S0-S1) | 1.8176223 | -0.4546537 | 0.7971484 |
| Emission (S1-S0) | 1.6719799 | -0.3554352 | 0.7142668 |
| Difference (S0-S1) | 0.1456424 | -0.0992185 | 0.0828816 |
| Angle = 1.9° | | | |

| **MIA@MIL-53** | | | |
| --- | --- | --- | --- |
| TDM | x | y | z |
| Absorption (S0-S1) | 1.7076416 | 0.9172188 | -0.1371604 |
| Emission (S1-S0) | 1.5876942 | -0.9185493 | -0.1183539 |
| Difference (S0-S1) | 0.1199474 | 0.0013305 | -0.0188065 |
| Angle = 1.8° | | | |

| **MIA@MOF-5** | | | |
| --- | --- | --- | --- |
| TDM | x | y | z |
| Absorption (S0-S1) | 0.0462862 | -2.0319814 | -0.0827332 |
| Emission (S1-S0) | -0.0345843 | -1.8358583 | -0.1126006 |
| Difference (S0-S1) | 0.0808705 | -0.1961231 |  |
| Angle = 2.7° | | | |


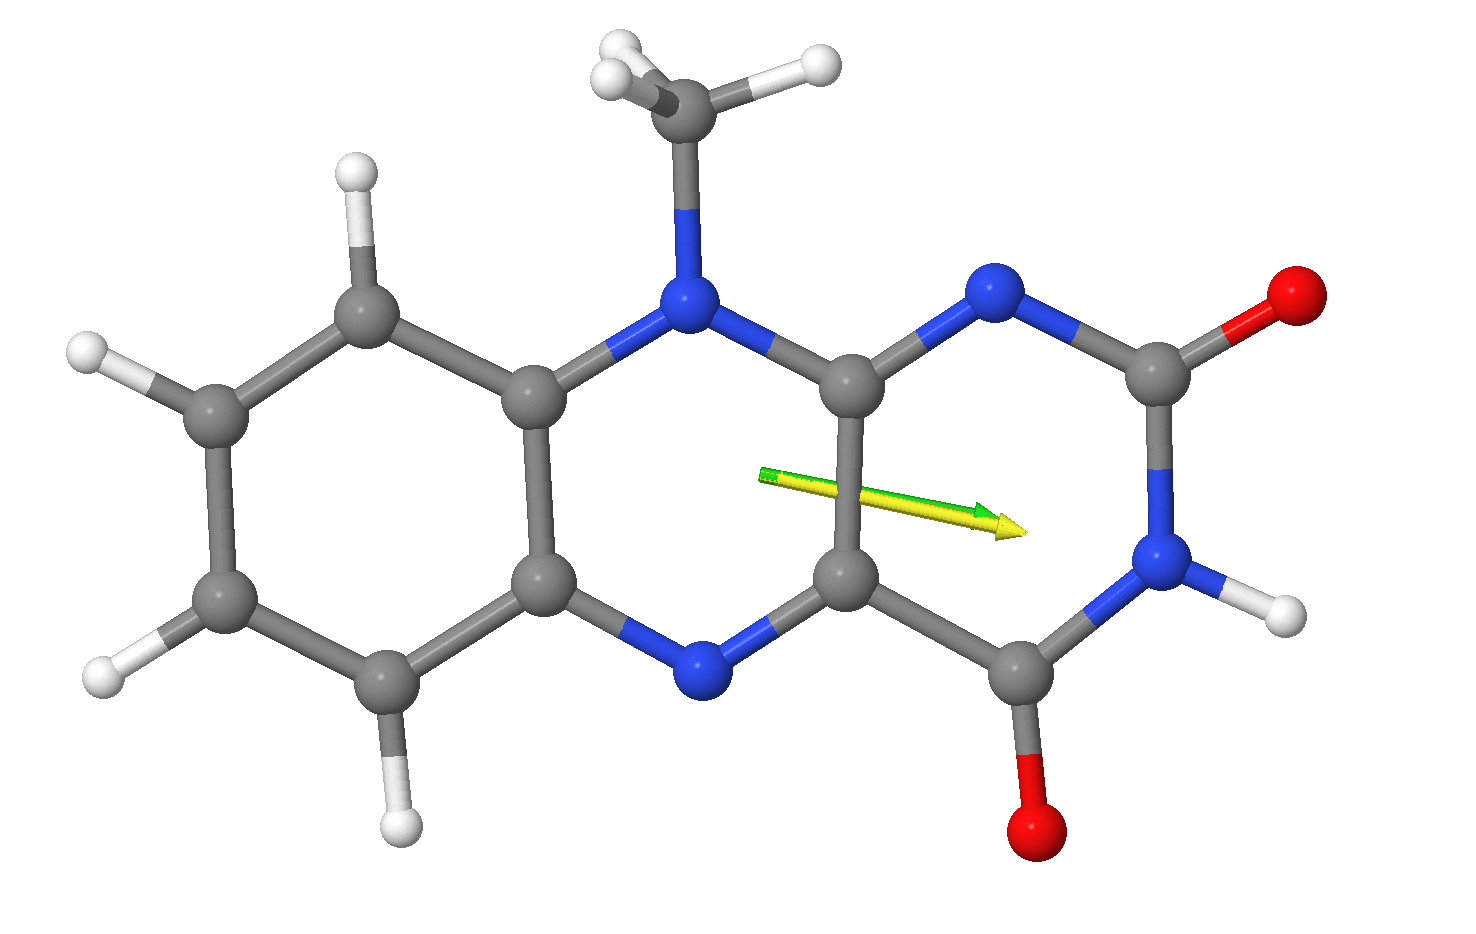


**Figure S41.** Transition dipole moments of MIA@MIL-53. Yellow arrow for S0-> S1 (absorption) and green arrow for S1-> S0 (fluorescence).

**References**

1. Brown, S.A.; Rizzo, C.J. A “One-Pot” Phase Transfer Alkylation/Hydrolysis of *o*-Nitrotrifluoroacetanilides. A Convenient Route to *N*-Alkyl o-Phenylenediamines. *Synth. Commun.* **1996**, *26*, 4065-4080. <https://doi.org/10.1080/00397919608003827> [↑](#endnote-ref-1)
2. Imada, Y.; Iida, H.; Ono, S.; Masui, Y.; Murahashi, S.-I. Flavin-Catalyzed Oxidation of Amines and Sulfides with Molecular Oxygen: Biomimetic Green Oxidation. *Chem. Asian J.* **2006**, 136-147. <https://doi.org/10.1002/asia.200600080> [↑](#endnote-ref-2)
3. Reiffers, A.; Ziegenbein, C.T.; Engelhardt, A.; Kühnemuth, R.; Gilch, P.; Czekelius, C. Impact of Mono-Fluorination on the Photophysics of the Flavin Chromophore. *Photochem. Photobiol.* **2018**, *94*, 667-676. <https://doi.org/10.1111/php.12921> [↑](#endnote-ref-3)
4. Kumar, V.; Bode, K.A.; Bryan, R.F.; Averill, B.A. Evidence for a competing condensation reaction in the alloxan synthesis of flavins: synthesis and crystal and molecular structures of 7-chloro-8-methylalloxazine and 7,10-dimethyl-8-[(2-hydroxyethyl)thio]isoalloxazine. *J. Am. Chem. Soc.* **1986**, *108*, 490-496. <https://doi.org/10.1021/ja00263a022> [↑](#endnote-ref-4)
5. Alaerts, L.; Maes, M.; Giebeler, L.; Jacobs, P.A.; Martens, J.A.; Denayer, J.F.M.; Kirschhock, C.E.A.; De Vos, D.E. Selective Adsorption and Separation of ortho-Substituted Alkylaromatics with the Microporous Aluminum Terephthalate MIL-53. *J. Am. Chem. Soc.* **2008**, *130*, 14170-14178. <https://doi.org/10.1021/ja802761z> [↑](#endnote-ref-5)
6. Loiseau, T.; Serre, C.; Huguenard, C.; Fink, G.; Taulelle, F.; Henry, M.; Bataille, T.; Férey, G. A Rationale for the Large Breathing of the Porous Aluminum Terephthalate (MIL-53) Upon Hydration *Chem. Eur. J.* **2004**, *10*, 1373-1382. <https://doi.org/10.1002/chem.200305413> [↑](#endnote-ref-6)
7. Han, S.; Wei, Y.; Valente, C.; Lagzi, I.; Gassensmith, J.J.; Coskun, A.; Stoddart, J.F.; Grzybowski, B.A. Chromatography in a Single Metal−Organic Framework (MOF) Crystal. *J. Am. Chem. Soc.* **2010**, *132*, 16358-16361. <https://doi.org/10.1021/ja1074322> [↑](#endnote-ref-7)
8. Eddaoudi, M.; Kim, J.; Rosi, N.; Vodak, D.; Wachter, J.; O'Keeffe, M.; Yaghi, O.M. Systematic Design of Pore Size and Functionality in Isoreticular MOFs and Their Application in Methane Storage. *Science* **2002**, *295*, 469-472. <https://doi.org/10.1126/science.1067208> [↑](#endnote-ref-8)
9. Brandenburg, K. *Diamond (Version 4.6), Crystal and Molecular Structure Visualization*, *Crystal Impact –* K. Brandenburg & H. Putz Gbr, Bonn, Germany, **2009-2022**. [↑](#endnote-ref-9)
10. Wang, M., Fritchie Jr., C.J. Geometry of the Unperturbed Flavin Nucleus. The Crystal Structure of 10-Methylisoalloxazine. *Acta Cryst.* **1973**, *B29*, 2040-2045. <https://doi.org/10.1107/S0567740873006096> [↑](#endnote-ref-10)
11. Meilikhov, M.; Yusenko, K.; Fischer, R.A. The adsorbate structure of ferrocene inside [Al(OH)(bdc)]x (MIL-53): a powder X-ray diffraction study. *Dalton Trans.* **2009**, 600-602. <https://doi.org/10.1039/B820882B> [↑](#endnote-ref-11)
12. Couck, S.; Gobechiya, E.; Kirschhock, C.E.A.; Serra-Crespo, P.; Juan-Alcañiz, J.; Martinez Joaristi, A.; Stavitski, E.; Gascon, J.; Kapteijn, F.; Baron, G.V.; Denayer, J.F.M. Adsorption and Separation of Light Gases on an Amino-Functionalized Metal–Organic Framework: An Adsorption and In Situ XRD Study. *ChemSusChem*, **2012**, *5*, 740-750. <https://doi.org/10.1002/cssc.201100378> [↑](#endnote-ref-12)
13. Rosenbach, N.J.; Jobic, H.; Ghoufi, A.; Salles, F.; Maurin, G.; Bourrelly, S.; Llewellyn, P.L.; Devic, T.; Serre, C.; Férey, G. Quasi-Elastic Neutron Scattering and Molecular Dynamics Study of Methane Diffusion in Metal Organic Frameworks MIL-47(V) and MIL-53(Cr). *Angew. Chem. Int. Ed.* **2008**, *47*, 6611-6615. <https://doi.org/10.1002/anie.200801748> [↑](#endnote-ref-13)
14. Salles, F.; Bourrelly, S.; Jobic, H.; Devic, T.; Guillerm, V.; Llewellyn, P.; Serre, C.; Ferey, G.; Maurin, G. Molecular Insight into the Adsorption and Diffusion of Water in the Versatile Hydrophilic/Hydrophobic Flexible MIL-53(Cr) MOF. *J. Phys. Chem. C* **2011**, 115, 21, 10764-10776. <https://doi.org/10.1021/jp202147m> [↑](#endnote-ref-14)
15. Bauer, S.; Serre, C.; Devic, T.; Horcajada, P.; Marrot, J.; Férey, G.; Stock, N. High-Throughput Assisted Rationalization of the Formation of Metal Organic Frameworks in the Iron(III) Aminoterephthalate Solvothermal System, *Inorg. Chem.* **2008**, *47*, 7568-7576. <https://doi.org/10.1021/ic800538r> [↑](#endnote-ref-15)
16. Serre, C.; Millange, F.; Thouvenot, C.; Noguès, M.; Marsolier, G.; Louër, D.; Férey, G. Very Large Breathing Effect in the First Nanoporous Chromium(III)-Based Solids: MIL-53 or CrIII(OH)·{O2C-C6H4-CO2}·{HO2C-C6H4-CO2H}x·H2Oy. *J. Am. Chem. Soc.* **2002**, *124*, 13519-13526. <https://doi.org/10.1021/ja0276974> [↑](#endnote-ref-16)
17. Millange, F.; Serre, C.; Férey, G. Synthesis, structure determination and properties of MIL-53as and MIL-53ht: the first CrIII hybrid inorganic–organic microporous solids: CrIII(OH)·{O2C-C6H4-CO2}·{HO2C-C6H4-CO2H}x. *Chem. Commun.* **2002**, 822-823. <https://doi.org/10.1039/B201381A> [↑](#endnote-ref-17)
18. Millange, F.; Guillou, N.; Walton, R.I.; Grenèche, J.-M.; Margiolaki, I.; Férey, G. Effect of the nature of the metal on the breathing steps in MOFs with dynamic frameworks. *Chem. Commun.* **2008**, 4732-4734. <https://doi.org/10.1039/B809419E> [↑](#endnote-ref-18)
19. H Li, H.; Eddaoudi, M.; O'Keeffe, M.; Yaghi, O.M. Design and synthesis of an exceptionally stable and highly porous metal-organic framework. *Nature* **1999**, *402*, 276-279. <https://doi.org/10.1038/46248> [↑](#endnote-ref-19)
20. Li, H.; Eddaoudi, M.; O'Keeffe, M.; Yaghi, O.M. *CCDC 256966: Experimental Crystal Structure Determination*, Cambridge Crystallographic Data Centre, **2005**. <https://doi.org/10.5517/cc8md7h> [↑](#endnote-ref-20)
21. Bailey, M.; Brown, C.J. The crystal structure of terephthalic acid. *Acta Crystallogr.* **1967**, *22*, 387-391. <https://doi.org/10.1107/s0365110x67000751> [↑](#endnote-ref-21)
22. Lock, N.; Wu, Y.; Christensen, M.; Cameron, L.J.; Peterson, V.K.; Bridgeman, A.J.; Kepert, C.J.; Iversen, B.B. Elucidating Negative Thermal Expansion in MOF-5. *J. Phys. Chem. C* **2010**, *114*, 16181-16186. <https://doi.org/10.1021/jp103212z> [↑](#endnote-ref-22)
23. Giannozzi, P.; Baroni, S.; Bonini, N.; Calandra, M.; Car, R.; Cavazzoni, C.; Ceresoli, D.; Chiarotti, G.L.; Cococcioni, M.; Dabo, I.; Dal Corso, A.; de Gironcoli, S.; Fabris, S.; Fratesi, G.; Gebauer, R.; Gerstmann, U.; Gougoussis, C.; Kokalj, A.; Lazzeri, M.; Martin-Samos, L.; Marzari, N.; Mauri, F.; Mazzarello, R.; Paolini, S.; Pasquarello, A.; Paulatto, L.; Sbraccia, C.; Scandolo, S.; Sclauzero, G.; Seitsonen, A.P.; Smogunov, A.; Umari, P.; Wentzcovitch, R.M. QUANTUM ESPRESSO: a modular and open-source software project for quantum simulations of materials. *J. Phys.: Condens. Matter* **2009**, *21*, 395502. <https://doi.org/10.1088/0953-8984/21/39/395502> [↑](#endnote-ref-23)
24. Vanduyfhuys, L.; Vandenbrande, S.; Verstraelen, T.; Schmid, R.; Waroquier, M.; Van Speybroeck, V. QuickFF: A program for a quick and easy derivation of force fields for metal-organic frameworks from ab initio input. *J. Comput. Chem.* **2015**, *36*, 1015-1027. <https://doi.org/10.1002/jcc.23877> [↑](#endnote-ref-24)
25. Frisch, M.J.; Trucks, G.W.; Schlegel, H.B.; Scuseria, G.E.; Robb, M.A.; Cheeseman, J.R.; Scalmani, G.; Barone, V.; Petersson, G.A.; Nakatsuji, H.; et al. *Gaussian 16*, Revision C.01; Gaussian, Inc.: Wallingford, CT, USA, 2016. [↑](#endnote-ref-25)
